# Supplementary material for: Palladium-catalysed oxidative nucleophilic allylation between alkenes and activated ketimines
Source: Royal Society of Chemistry journal article supplement (doi:10.1039/d1qo00505g), 2021-01-01

# **Palladium-catalysed oxidative nucleophilic allylation between alkenes and activated ketimines**

Yue Li,<sup>a</sup> Peng Chen,<sup>a</sup> Zhi-Chao Chen,<sup>\*a</sup> Wei Du,<sup>a</sup> Qin Ouyang,<sup>b</sup> Ying-Chun Chen<sup>\*a,b</sup>

<sup>a</sup> Key Laboratory of Drug-Targeting and Drug Delivery System of the Ministry of Education and Sichuan Research Center for Drug Precision Industrial Technology, West China School of Pharmacy, Sichuan University, Chengdu 610041, China

<sup>b</sup> College of Pharmacy, Third Military Medical University, Shapingba, Chongqing 400038, China

E-mail: chenzhichao@scu.edu.cn; ycchen@scu.edu.cn

## **Supplementary Information**

|                                                                                     |            |
|-------------------------------------------------------------------------------------|------------|
| <b>1. General methods .....</b>                                                     | <b>S2</b>  |
| <b>2. Screenings for the oxidative nucleophilic allylation.....</b>                 | <b>S4</b>  |
| <b>3. Mechanism study for the umpolung allylation reactions .....</b>               | <b>S7</b>  |
| <b>4. General procedure for the oxidative nucleophilic allylation.....</b>          | <b>S11</b> |
| <b>5. Screening conditions of asymmetric oxidative nucleophilic allylation.....</b> | <b>S32</b> |
| <b>6. Crystal data and structural refinement for racemic 7a and 7j.....</b>         | <b>S34</b> |
| <b>7. NMR, HRMS spectra and HPLC chromatograms .....</b>                            | <b>S37</b> |

## 1. General methods

Unless otherwise noted, the reactions were carried out under ambient atmosphere; when the reactions required heating, the heat source was oil bath. <sup>1</sup>H NMR (400 MHz or 600 MHz), <sup>13</sup>C NMR (100 MHz or 150 MHz) and <sup>19</sup>F NMR (376 MHz) spectra were recorded on Varian INOVA–400/54, Agilent DD2–600/54 or Bruker Ascend™ 400 instruments (Chemical shifts were reported in ppm from tetramethylsilane with the solvent resonance as the internal standard in CDCl<sub>3</sub> solution, unless otherwise noted). The following abbreviations were used to explain the multiplicities: s = singlet, d = doublet, t = triplet, q = quartet, dd = doublet doublet, td = triple doublet, dt = double triplet, brs = broad singlet, m = multiplet, and coupling constants (*J*) are reported in Hertz (Hz). High resolution mass spectra (HRMS) were recorded on a Waters SYNAPT G2, Agilent G1969-85000 or Shimadzu LCMS-IT-TOF using a time-of-flight mass spectrometer equipped with electrospray ionization (ESI) source. X-ray diffraction experiments were carried out on an Agilent Gemini and the data obtained were deposited at the Cambridge Crystallographic Data Centre. In each case, enantiomeric excess was determined by HPLC analysis on a chiral stationary phase in comparison with the authentic racemate, using a Daicel Chiralpak IE Column (250 × 4.6 mm). UV detection was monitored at 254 nm. Column chromatography was performed on silica gel (200–300 mesh) eluting with redistilled EtOAc and petroleum ether (PE). TLC was performed on glass-backed silica plates. UV light (monitored at 254 nm), I<sub>2</sub> and solution of potassium permanganate were used to visualize products or starting materials. All chemicals were used without purification as commercially available unless otherwise noted. Alkenes **1**,<sup>1</sup> isatin-derived ketimines **2**, pyrazoledione-derived ketimines **4**, isoquinoline-1,3,4-trione-derived ketimines **6**,<sup>2</sup> allylic carbonates **8**,<sup>3</sup> (allyl-1,1-*d*<sub>2</sub>)benzene *d*-**1a**<sup>4</sup> were prepared according to the literature procedures.

- (a) E. Alacid and C. Nájera, Palladium-Catalyzed Cross-Coupling Reactions of Potassium Alkenyltrifluoroborates with Organic Halides in Aqueous Media, *J. Org. Chem.*, 2009, **74**, 2321; (b) W. Yang, H. Chen, J. Li, C. Li, W. Wu and H. Jiang, Palladium-Catalyzed Aerobic Oxidative Double Allylic C–H Oxygenation of Alkenes: A Novel and Straightforward Route to  $\alpha,\beta$ -Unsaturated Esters, *Chem. Commun.*, 2015, **51**, 9575; (c) X. Wang and Y. Wu, Direct Oxidative Isoperfluoropropylation of Terminal Alkenes via Hexafluoropropylene (HFP) and Silver Fluoride, *Chem. Commun.*, 2018, **54**, 1877; (d) V. Sabatino, J. G. Rebelein and T. R. Ward, “Close-to-Release”: Spontaneous Bioorthogonal Uncaging Resulting from Ring-Closing

- Metathesis, *J. Am. Chem. Soc.*, 2019, **141**, 17048; (e) S. Engl and O. Reiser, Copper Makes the Difference: Visible Light-Mediated Atom Transfer Radical Addition Reactions of Iodoform with Olefins, *ACS Catal.*, 2020, **10**, 9899; (f) W. Li, S. Yu, J. Li and Y. Zhao, Nickel-Catalyzed Allylmethylation of Alkynes with Allylic Alcohols and AlMe<sub>3</sub>: Facile Access to Skipped Dienes and Trienes, *Angew. Chem., Int. Ed.*, 2020, **59**, 14404.
- 2 (a) J. Wang, Y. Liu, Y. Liu, Z. Wei, J. Cao, D. Liang, Y. Lin and H. Duan, L-*tert*-Leucine Derived Urea-Ammonium salts: Efficient Bifunctional Phase Transfer Catalysts for Highly Diastereo- and Enantioselective Aza-Henry Reaction of Isatin-Derived N-Boc Ketimines with  $\alpha$ -Aryl Nitromethanes, *Tetrahedron*, 2019, **75**, 2883; (b) G.-Y. Ran, C. Chen, X.-X. Yang, Z. Zhao, W. Du and Y.-C. Chen, Cu(I)-Catalyzed Asymmetric  $\alpha$ -Allenylation of Activated Ketimines with 3-Butynoates, *Org. Lett.*, 2020, **22**, 4732; (c) Y. You, W.-Y. Lu, K.-X. Xie, J.-Q. Zhao, Z.-H. Wang and W.-C. Yuan, Enantioselective Synthesis of Isoquinoline-1,3(2*H*,4*H*)-dione Derivatives via a Chiral Phosphoric Acid Catalyzed Aza-Friedel–Crafts Reaction, *Chem. Commun.*, 2019, **55**, 8478.
- 3 J. Štambaský, A. V. Malkov and P. Kočovský, Synthesis of Enantiopure 1-Arylprop-2-en-1-ols and Their *tert*-Butyl Carbonates, *J. Org. Chem.*, 2008, **73**, 9148.
- 4 Q. Wu, L. Wang, R. Jin, C. Kang, Z. Bian, Z. Du, X. Ma, H. Guo and L. Gao, Nickel-Catalyzed Allylic C(sp<sup>2</sup>)-H Activation: Stereoselective Allyl Isomerization and Regiospecific Allyl Arylation of Allylarenes, *Eur. J. Org. Chem.*, 2016, 5415.

## 2. Screenings for the oxidative nucleophilic allylation

### 2.1 Unsuccessful exploration of allylbenzene **1a** and other electrophilic reagents

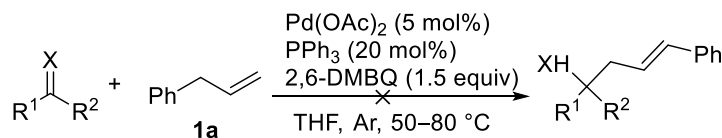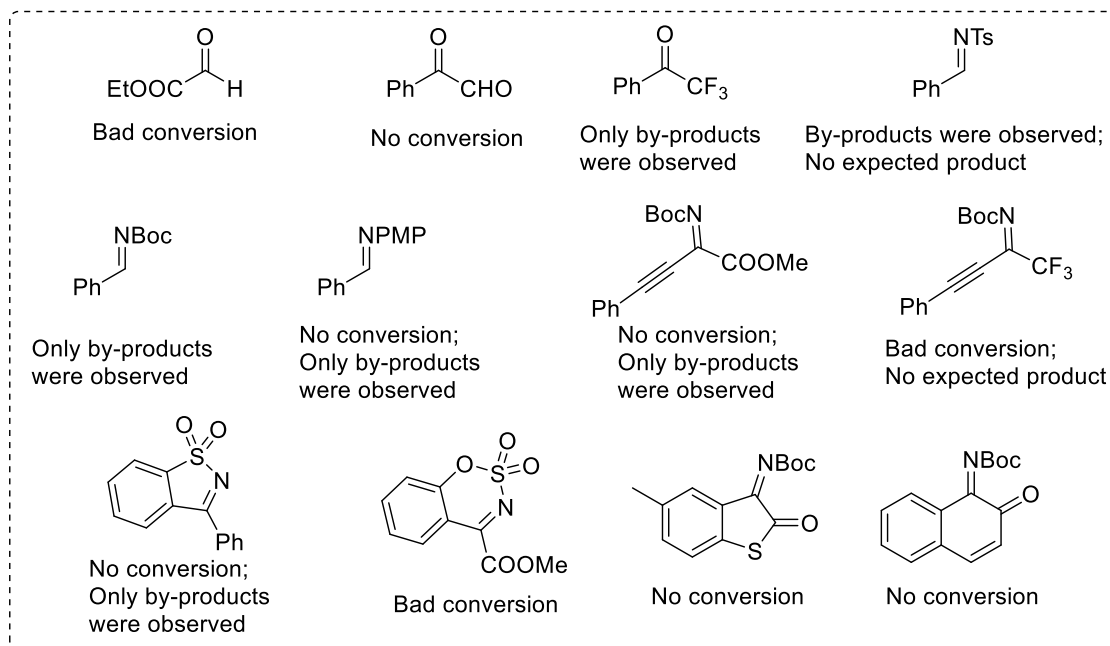

More electrophilic reagents were explored in the reactions with allylbenzene **1a** under similar catalytic conditions. Unfortunately, the reagents outlined in the above scheme did not react with allylbenzene **1a** or failed to give the desired allylation products.

### 2.2 Control experiments for the oxidative nucleophilic allylation of allylbenzene **1a** and isatin-derived ketimine **2a**

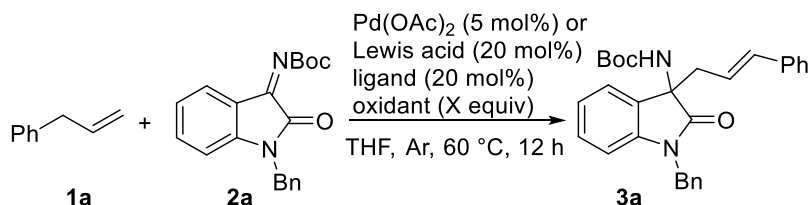

| entry <sup>a</sup> | [Pd]                 | Lewis acid | base | ligand           | oxidant  | solvent | yield (%) <sup>b</sup> |
|--------------------|----------------------|------------|------|------------------|----------|---------|------------------------|
| 1 <sup>c</sup>     | Pd(OAc) <sub>2</sub> | /          | /    | PPh <sub>3</sub> | 2,6-DMBQ | THF     | 40                     |
| 2                  | Pd(OAc) <sub>2</sub> | /          | /    | PPh <sub>3</sub> | 2,6-DMBQ | THF     | 52                     |
| 3                  | /                    | /          | /    | PPh <sub>3</sub> | 2,6-DMBQ | THF     | NR                     |
| 4                  | Pd(OAc) <sub>2</sub> | /          | /    | /                | 2,6-DMBQ | THF     | NR                     |

|                 |                      |                      |                                 |                  |                       |     |    |
|-----------------|----------------------|----------------------|---------------------------------|------------------|-----------------------|-----|----|
| 5               | Pd(OAc) <sub>2</sub> | /                    | /                               | PPh <sub>3</sub> | /                     | THF | NR |
| 6 <sup>d</sup>  | Pd(OAc) <sub>2</sub> | /                    | /                               | PPh <sub>3</sub> | 2,6-DMBQ              | THF | NR |
| 7               | /                    | Sc(OTf) <sub>3</sub> | /                               | /                | /                     | THF | NR |
| 8               | /                    | Zn(OAc) <sub>2</sub> | /                               | /                | /                     | THF | NR |
| 9               | /                    | AlCl <sub>3</sub>    | /                               | /                | /                     | THF | NR |
| 10              | /                    | FeCl <sub>3</sub>    | /                               | /                | /                     | THF | NR |
| 11 <sup>e</sup> | Pd(OAc) <sub>2</sub> | /                    | <i>t</i> -BuOK                  | PPh <sub>3</sub> | /                     | THF | NR |
| 12 <sup>e</sup> | Pd(OAc) <sub>2</sub> | /                    | Cs <sub>2</sub> CO <sub>3</sub> | PPh <sub>3</sub> | /                     | THF | NR |
| 13 <sup>e</sup> | Pd(OAc) <sub>2</sub> | /                    | Et <sub>3</sub> N               | PPh <sub>3</sub> | /                     | THF | NR |
| 14 <sup>e</sup> | Pd(OAc) <sub>2</sub> | /                    | NaHCO <sub>3</sub>              | PPh <sub>3</sub> | /                     | THF | NR |
| 15 <sup>e</sup> | Pd(OAc) <sub>2</sub> | /                    | /                               | PPh <sub>3</sub> | PhI(OAc) <sub>2</sub> | THF | NR |
| 16 <sup>f</sup> | Pd(OAc) <sub>2</sub> | /                    | /                               | PPh <sub>3</sub> | /                     | THF | NR |

<sup>a</sup>Unless noted otherwise, reactions were performed with allylbenzene **1a** (0.25 mmol), isatin ketimine **2a** (0.1 mmol), [Pd] (5 mol%), ligand (20 mol%) and oxidant (0.15 mmol) in distilled THF (1.0 mL) at 60 °C for 12 h. <sup>b</sup>Yield of the isolated **3a**. <sup>c</sup>At 50 °C. <sup>d</sup>With 2,6-DMBQ (10 mol%). <sup>e</sup>With isoquinoline-1,3,4-trione-derived ketimine **6a**. <sup>f</sup>With Pd(OAc)<sub>2</sub> (1.0 equiv) and PPh<sub>3</sub> (4.0 equiv). NR = No reaction.

Moreover, hydroquinone has been known as a viable catalyst for a carbonyl-ene reaction (*J. Am. Chem. Soc.*, **1960**, 82, 5411). Thus, control experiment between **1a** and **2a** in the presence of 2,6-dimethylhydroquinone were conducted, but only unwanted byproducts were observed, demonstrating that the current allylation of activated ketimine did not proceed through hydroquinone-catalyzed ene reaction.

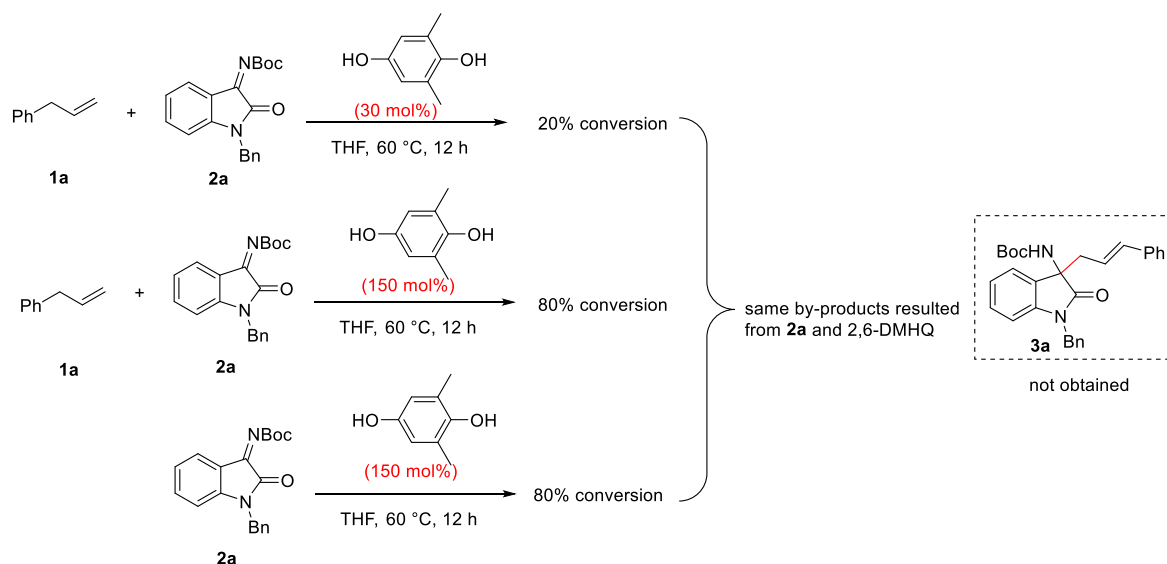

## 2.3 Detailed screening conditions for the oxidative nucleophilic allylation of allylbenzene 1a and isatin-derived ketimine 2a

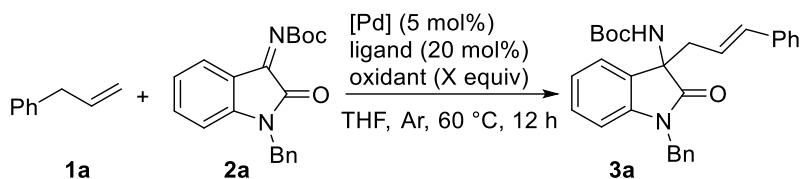

| entry <sup>a</sup> | [Pd]                               | ligand                                              | oxidant                        | X    | additive                   | solvent                    | yield (%) <sup>b</sup> |
|--------------------|------------------------------------|-----------------------------------------------------|--------------------------------|------|----------------------------|----------------------------|------------------------|
| 1 <sup>c</sup>     | Pd(OAc) <sub>2</sub>               | PPh <sub>3</sub>                                    | 2,6-DMBQ                       | 1.5  | /                          | THF                        | 52                     |
| 2 <sup>d</sup>     | Pd(OAc) <sub>2</sub>               | PPh <sub>3</sub>                                    | 2,6-DMBQ                       | 1.5  | /                          | THF                        | 44                     |
| 3                  | Pd(OAc) <sub>2</sub>               | PPh <sub>3</sub>                                    | 2,6-DMBQ                       | 1.5  | /                          | THF                        | 62                     |
| 4                  | Pd(OAc) <sub>2</sub>               | PPh <sub>3</sub>                                    | 2,6-DMBQ                       | 1.5  | /                          | toluene                    | 39                     |
| 5                  | Pd(OAc) <sub>2</sub>               | PPh <sub>3</sub>                                    | 2,6-DMBQ                       | 1.5  | /                          | dioxane                    | 42                     |
| 6                  | Pd(OAc) <sub>2</sub>               | PPh <sub>3</sub>                                    | 2,6-DMBQ                       | 1.5  | /                          | MTBE                       | 49                     |
| 7                  | Pd(OAc) <sub>2</sub>               | PPh <sub>3</sub>                                    | 2,6-DMBQ                       | 1.5  | /                          | <i>n</i> Bu <sub>2</sub> O | trace                  |
| 8                  | Pd(OAc) <sub>2</sub>               | (4-MeC <sub>6</sub> H <sub>4</sub> ) <sub>3</sub> P | 2,6-DMBQ                       | 1.5  | /                          | THF                        | 53                     |
| 9                  | Pd(OAc) <sub>2</sub>               | (4-FC <sub>6</sub> H <sub>4</sub> ) <sub>3</sub> P  | 2,6-DMBQ                       | 1.5  | /                          | THF                        | trace                  |
| 10                 | Pd(OAc) <sub>2</sub>               | PCy <sub>3</sub>                                    | 2,6-DMBQ                       | 1.5  | /                          | THF                        | NR                     |
| 11                 | Pd(OAc) <sub>2</sub>               | PBu <sub>3</sub>                                    | 2,6-DMBQ                       | 1.5  | /                          | THF                        | NR                     |
| 12                 | Pd(OAc) <sub>2</sub>               | PPh <sub>3</sub>                                    | 2,6-DMBQ                       | 1.5  | 3 Å MS                     | THF                        | trace                  |
| 13                 | Pd(OAc) <sub>2</sub>               | PPh <sub>3</sub>                                    | 2,6-DMBQ                       | 1.5  | 3 Å MS/PhCO <sub>2</sub> H | THF                        | 50                     |
| 14                 | Pd(OAc) <sub>2</sub>               | PPh <sub>3</sub>                                    | 2,6-DMBQ                       | 1.5  | 3 Å MS/H <sub>2</sub> O    | THF                        | 68                     |
| 15                 | Pd(OAc) <sub>2</sub>               | PPh <sub>3</sub>                                    | BQ                             | 1.5  | 3 Å MS/H <sub>2</sub> O    | THF                        | bad conv.              |
| 16                 | Pd(OAc) <sub>2</sub>               | PPh <sub>3</sub>                                    | 2,5-DMBQ                       | 1.5  | 3 Å MS/H <sub>2</sub> O    | THF                        | 66                     |
| 17                 | Pd(OAc) <sub>2</sub>               | PPh <sub>3</sub>                                    | 2,6-DTBQ                       | 1.5  | 3 Å MS/H <sub>2</sub> O    | THF                        | trace                  |
| 18                 | Pd(OAc) <sub>2</sub>               | PPh <sub>3</sub>                                    | phenyl- <i>p</i> -benzoquinone | 1.5  | 3 Å MS/H <sub>2</sub> O    | THF                        | trace                  |
| 19                 | Pd(OAc) <sub>2</sub>               | PPh <sub>3</sub>                                    | DDQ                            | 1.5  | 3 Å MS/H <sub>2</sub> O    | THF                        | NR                     |
| 20                 | Pd(OAc) <sub>2</sub>               | PPh <sub>3</sub>                                    | 2,6-DMBQ                       | 1.0  | 3 Å MS/H <sub>2</sub> O    | THF                        | 43                     |
| 21                 | Pd(OAc) <sub>2</sub>               | PPh <sub>3</sub>                                    | 2,6-DMBQ                       | 1.25 | 3 Å MS/H <sub>2</sub> O    | THF                        | 50                     |
| 22                 | Pd(OAc) <sub>2</sub>               | PPh <sub>3</sub>                                    | 2,6-DMBQ                       | 1.75 | 3 Å MS/H <sub>2</sub> O    | THF                        | 52                     |
| 23 <sup>e</sup>    | Pd(OAc) <sub>2</sub>               | PPh <sub>3</sub>                                    | 2,6-DMBQ                       | 1.5  | 3 Å MS/H <sub>2</sub> O    | THF                        | 58                     |
| 24 <sup>f</sup>    | Pd(OAc) <sub>2</sub>               | PPh <sub>3</sub>                                    | 2,6-DMBQ                       | 1.5  | 3 Å MS/H <sub>2</sub> O    | THF                        | 67                     |
| 25 <sup>g</sup>    | Pd(OAc) <sub>2</sub>               | PPh <sub>3</sub>                                    | 2,6-DMBQ                       | 1.5  | 3 Å MS/H <sub>2</sub> O    | THF                        | 65                     |
| 26                 | PdCl <sub>2</sub>                  | PPh <sub>3</sub>                                    | 2,6-DMBQ                       | 1.5  | 3 Å MS/H <sub>2</sub> O    | THF                        | NR                     |
| 27                 | Pd(PPh <sub>3</sub> ) <sub>4</sub> | /                                                   | 2,6-DMBQ                       | 1.5  | 3 Å MS/H <sub>2</sub> O    | THF                        | trace                  |
| 28                 | Pd <sub>2</sub> (dba) <sub>3</sub> | PPh <sub>3</sub>                                    | 2,6-DMBQ                       | 1.5  | 3 Å MS/H <sub>2</sub> O    | THF                        | trace                  |
| 29                 | Pd(TFA) <sub>2</sub>               | PPh <sub>3</sub>                                    | 2,6-DMBQ                       | 1.5  | 3 Å MS/H <sub>2</sub> O    | THF                        | NR                     |
| 30 <sup>h</sup>    | Pd(OAc) <sub>2</sub>               | PPh <sub>3</sub>                                    | 2,6-DMBQ                       | 1.5  | 3 Å MS/H <sub>2</sub> O    | THF                        | no product             |
| 31 <sup>i</sup>    | Pd(OAc) <sub>2</sub>               | PPh <sub>3</sub>                                    | 2,6-DMBQ                       | 1.5  | 3 Å MS/H <sub>2</sub> O    | THF                        | no product             |

|                 |                                    |   |          |     |                         |     |    |
|-----------------|------------------------------------|---|----------|-----|-------------------------|-----|----|
| 32 <sup>j</sup> | Pd(PPh <sub>3</sub> ) <sub>4</sub> | / | 2,6-DMBQ | 1.5 | 3 Å MS/H <sub>2</sub> O | THF | 51 |
| 33 <sup>k</sup> | Pd(PPh <sub>3</sub> ) <sub>4</sub> | / | 2,6-DMBQ | 1.5 | 3 Å MS/H <sub>2</sub> O | THF | 49 |

<sup>a</sup>Unless noted otherwise, reactions were performed with allylbenzene **1a** (0.25 mmol), isatin ketimine **2a** (0.1 mmol), [Pd] (5 mol%), ligand (20 mol%) and oxidant (0.15 mmol) in distilled THF (2.0 mL) at 60 °C for 12 h. For 3 Å MS (50 mg); H<sub>2</sub>O (2 µL); PhCO<sub>2</sub>H (20 mol%). <sup>b</sup>Yield of the isolated **3a**. <sup>c</sup>In THF (1.0 mL). <sup>d</sup>In THF (0.4 mL). <sup>e</sup>With allylbenzene **1a** (0.20 mmol). <sup>f</sup>With allylbenzene **1a** (0.30 mmol). <sup>g</sup>With PPh<sub>3</sub> (10 mol%). <sup>h</sup>With *n*-Bu<sub>4</sub>NBr (20 mol%). <sup>i</sup>With *n*-Bu<sub>4</sub>NCl (20 mol%). <sup>j</sup>With PhCO<sub>2</sub>H (20 mol%). <sup>k</sup>With HOAc (20 mol%). NR = No reaction.

### 3. Mechanism study for the umpolung allylation reactions

#### 3.1 Reactions with allylic carbonate

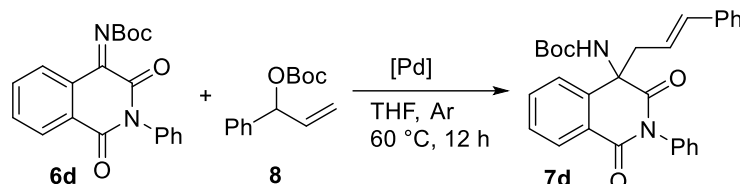

Procedure A: Pd(PPh<sub>3</sub>)<sub>4</sub> (1.0 equiv) 63% yield  
 Procedure B: Pd(OAc)<sub>2</sub> (1.0 equiv)/PPh<sub>3</sub> (4.0 equiv) 66% yield  
 Procedure C: Pd(OAc)<sub>2</sub> (5 mol%)/PPh<sub>3</sub> (20 mol%) trace

**Procedure A:** *Tert*-butyl (1,3-dioxo-2-phenyl-2,3-dihydroisoquinolin-4(1*H*)-ylidene)carbamate **6d** (17.5 mg, 0.0499 mmol), Pd(PPh<sub>3</sub>)<sub>4</sub> (57.8 mg, 0.0500 mmol, 1.0 equiv) and *tert*-butyl (1-phenylallyl) carbonate **8** (29.3 mg, 0.125 mmol, 2.5 equiv) were added to a 10 mL Schlenk tube, and the tube was evacuated and back-filled three times with argon. Then distilled THF (0.5 mL) was added by syringe, and the tube was evacuated and back-filled three times with argon again. The Schlenk tube was tightly capped. The reaction mixture was stirred at 60 °C for 12 h. After completion (monitored by TLC), the solvent was evaporated in vacuo. The residue was purified by flash chromatography on silica gel (petroleum ether/EtOAc = 8:1) to give the product **7d**: 14.8 mg (0.0316 mmol), as a white solid, 63% yield.

**Procedure B:** *Tert*-butyl (1,3-dioxo-2-phenyl-2,3-dihydroisoquinolin-4(1*H*)-ylidene)carbamate **6d** (17.5 mg, 0.0499 mmol), Pd(OAc)<sub>2</sub> (11.2 mg, 0.0499 mmol, 1.0 equiv), PPh<sub>3</sub> (52.5 mg, 0.200 mmol, 4.0 equiv) and *tert*-butyl (1-phenylallyl) carbonate **8** (29.3 mg, 0.125 mmol, 2.5 equiv) were added to a 10 mL Schlenk tube, and the tube was evacuated and back-filled three times with argon. Then distilled THF (0.5 mL) was added by syringe, and the tube was evacuated and back-filled three times with argon again. The Schlenk tube was tightly capped. The reaction mixture was stirred at 60 °C for 12 h. After completion (monitored by TLC), the solvent was evaporated in vacuo. The residue was purified by flash chromatography on silica gel (petroleum ether/EtOAc = 8:1) to give the product **7d**: 15.5 mg (0.0331 mmol), as a white solid, 66% yield.

**Procedure C:** *Tert*-butyl (1,3-dioxo-2-phenyl-2,3-dihydroisoquinolin-4(1*H*)-ylidene)carbamate **6d** (17.5 mg, 0.0499 mmol), Pd(OAc)<sub>2</sub> (0.6 mg, 0.0027 mmol, 5 mol%), PPh<sub>3</sub> (2.6 mg, 0.0099 mmol, 20 mol%) and *tert*-butyl (1-phenylallyl) carbonate **8** (29.3 mg, 0.125 mmol, 2.5 equiv) were added to a 10 mL Schlenk tube, and the tube was evacuated and back-filled three times with argon. Then distilled THF (0.5 mL) was added by syringe, and the tube was evacuated and back-filled three times with argon again. The Schlenk tube was tightly capped. The reaction mixture was stirred at 60 °C for 12 h. After completion (monitored by TLC), only trace amount of product **7d** was generated.

### 3.2 Deuterium experiments

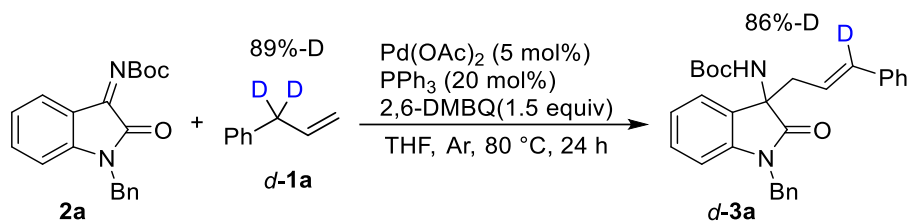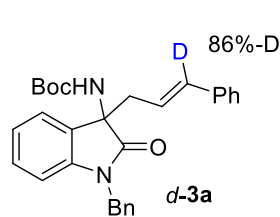

**Synthesis of (*d*-3a):** *Tert*-butyl (*E*)-(1-benzyl-2-oxoindolin-3-ylidene)carbamate **2a** (33.6 mg, 0.0999 mmol), Pd(OAc)<sub>2</sub> (1.2 mg, 0.0053 mmol, 5 mol%), PPh<sub>3</sub> (5.2 mg, 0.020 mmol, 20 mol%), 2,6-DMBQ (20.4 mg, 0.150 mmol, 1.5 equiv), 3 Å MS (50 mg) and (allyl-1,1-*d*<sub>2</sub>)benzene

***d*-1a** (35.6 mg, 0.250 mmol, 2.5 equiv) were added to a 10 mL Schlenk tube, and the tube was evacuated and back-filled three times with argon. Then H<sub>2</sub>O (2 μL) and distilled THF (2.0 mL) were added by syringe, and the tube was evacuated and back-filled three times with argon again. The Schlenk tube was tightly capped. The reaction mixture was stirred at 80 °C for 24 h. After completion (monitored by TLC), the reaction was quenched by saturated sodium carbonate solution, and the mixture was stirred vigorously for 30 min, then extracted with EtOAc. The combined organic phases were evaporated under vacuo. The crude reaction mixture was purified by flash chromatography on silica gel (petroleum ether/EtOAc = 7:1) to give the product ***d*-3a**: 28.8 mg (0.0632 mmol), as a white solid, 63% yield, D% = 86%; m.p. 157–159 °C; <sup>1</sup>H NMR (400 MHz, CDCl<sub>3</sub>): δ (ppm) 7.49–6.92 (m, 13H), 6.66 (d, *J* = 7.6 Hz, 1H), 6.51 (d, *J* = 15.6 Hz, 0.14H), 6.12–5.80 (m, 1H), 5.48–4.92 (m, 2H), 4.64 (s, 1H), 2.82 (dd, *J* = 13.2 Hz, 7.2 Hz, 1H), 2.70 (dd, *J* = 13.2 Hz, 8.0 Hz, 1H), 1.26 (s, 9H); <sup>13</sup>C NMR (100 MHz, CDCl<sub>3</sub>): δ (ppm) 176.7, 153.7, 142.5, 136.4, 135.7, 128.8, 128.7, 128.6, 127.8, 127.4, 127.2, 126.49, 126.47, 122.73, 122.65, 120.9, 109.3,



80.5, 61.5, 44.2, 41.6, 28.1; HRMS (ESI-TOF)  $m/z$ :  $[M + Na]^+$  Calcd for  $[C_{29}H_{29}DN_2O_3 + Na]^+$  478.2211; Found 478.2209.

### 3.3 Characterisation of by-products in the oxidative nucleophilic allylation reaction

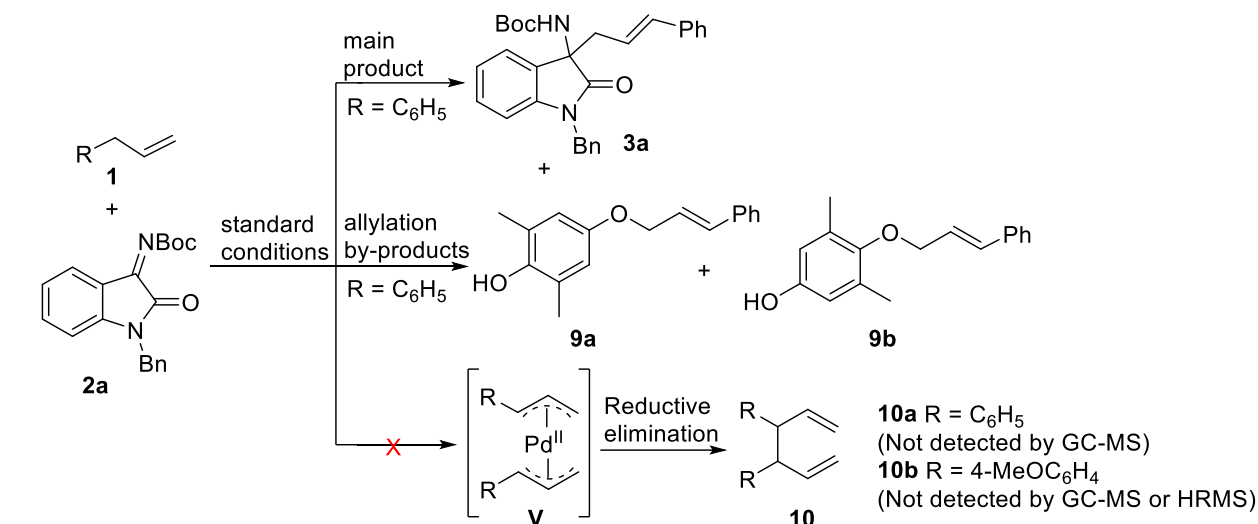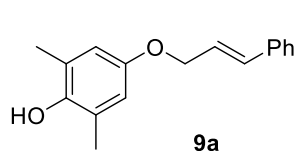

**4-(Cinnamyloxy)-2,6-dimethylphenol (9a):** *Tert*-butyl

(1-benzyl-2-oxindolin-3-ylidene)carbamate **2a** (33.6 mg, 0.0999 mmol), Pd(OAc)<sub>2</sub> (1.2 mg, 0.0053 mmol, 5 mol%), PPh<sub>3</sub> (5.2 mg, 0.020 mmol, 20 mol%), 2,6-DMBQ (20.4 mg, 0.150 mmol, 1.5 equiv), 3 Å MS (50 mg) and allylbenzene **1a** (29.5 mg, 0.250 mmol, 2.5 equiv) were added to a 10 mL Schlenk tube, and the tube was evacuated and back-filled three times with argon. Then H<sub>2</sub>O (2 μL) and distilled THF (2.0 mL) was added by syringe, and the tube was evacuated and back-filled three times with argon again. The Schlenk tube was tightly capped. The reaction mixture was stirred at 60 °C for 12 h. After completion (monitored by TLC), the combined organic phases were evaporated under vacuo. The crude reaction mixture was purified by flash chromatography on silica gel (petroleum ether/EtOAc = 18:1) to give the **9a**:

11.2 mg (0.0440 mmol), as a white solid, consumed 18% of allylbenzene; m.p. 82–84 °C; <sup>1</sup>H NMR (400 MHz, CDCl<sub>3</sub>) δ (ppm) 7.40 (d,  $J = 7.2$  Hz, 2H), 7.32 (t,  $J = 7.2$  Hz, 2H), 7.28–7.20 (m, 1H), 6.71 (d,  $J = 16.0$  Hz, 1H), 6.61 (s, 2H), 6.48–6.30 (m, 1H), 4.61 (d,  $J = 4.8$  Hz, 2H), 4.27 (s, 1H), 2.23 (s, 6H); <sup>13</sup>C NMR (100 MHz, CDCl<sub>3</sub>): δ (ppm) 152.1, 146.4, 136.6, 132.6, 128.6, 127.8, 126.6, 125.0, 124.1, 114.9, 69.3, 16.3; HRMS (ESI-TOF)  $m/z$ :  $[M + H]^+$  Calcd for  $[C_{17}H_{18}O_2 + H]^+$  255.1380; Found 255.1375.

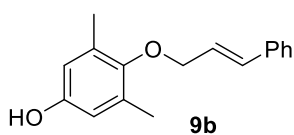

**4-(Cinnamyloxy)-3,5-dimethylphenol (9b):** *Tert*-butyl (1-benzyl-2-oxoindolin-3-ylidene)carbamate **2a** (33.6 mg, 0.0999 mmol), Pd(OAc)<sub>2</sub> (1.2 mg, 0.0053 mmol, 5 mol%), PPh<sub>3</sub> (5.2 mg, 0.020 mmol, 20 mol%),

2,6-DMBQ (20.4 mg, 0.150 mmol, 1.5 equiv), 3 Å MS (50 mg) and allylbenzene **1a** (29.5 mg, 0.250 mmol, 2.5 equiv) were added to a 10 mL Schlenk tube, and the tube was evacuated and back-filled three times with argon. Then H<sub>2</sub>O (2 μL) and distilled THF (2.0 mL) was added by syringe, and the tube was evacuated and back-filled three times with argon again. The Schlenk tube was tightly capped. The reaction mixture was stirred at 60 °C for 12 h. After completion (monitored by TLC), the combined organic phases were evaporated under vacuo. The crude reaction mixture was purified by flash chromatography on silica gel (petroleum ether/EtOAc = 18:1) to give the **9b**: 12.0 mg (0.0472 mmol), as a white solid, consumed 19% of allylbenzene; m.p. 74–76 °C; <sup>1</sup>H NMR (400 MHz, CDCl<sub>3</sub>) δ (ppm) 7.42 (d, *J* = 7.6 Hz, 2H), 7.33 (t, *J* = 7.6 Hz, 2H), 7.30–7.21 (m, 1H), 6.72 (d, *J* = 16.0 Hz, 1H), 6.49 (s, 2H), 6.48–6.41 (m, 1H), 4.57 (s, 1H), 4.42 (d, *J* = 5.6 Hz, 1H), 2.26 (s, 6H); <sup>13</sup>C NMR (100 MHz, CDCl<sub>3</sub>): δ (ppm) 150.2, 148.7, 135.6, 131.4, 131.2, 127.6, 126.8, 125.5, 124.3, 114.0, 72.1, 15.5; HRMS (ESI-TOF) *m/z*: [M + H]<sup>+</sup> Calcd for [C<sub>17</sub>H<sub>18</sub>O<sub>2</sub> + H]<sup>+</sup> 255.1380; Found 255.1373.

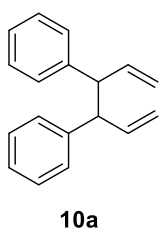

**10a**

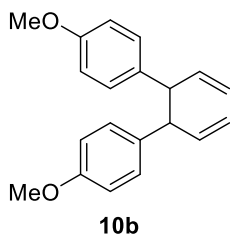

**10b**

To further verifying whether the reaction involves the bisallylpalladium intermediate **V**, GC-MS and HRMS were used to monitor the formation of the reductive elimination product **10** of the  $\eta^3,\eta^3$ -bisallylpalladium complex. However, the signal of the possible allyl-allyl cross-coupling product **10a** was not detected by GC-MS and **10b** was not detected by GC-MS or HRMS. As a result, the  $\eta^3,\eta^3$ -bisallylpalladium species might not be formed in the current catalytic reaction, and the reaction might proceed via isomerisation to  $\eta^1$ -allylpalladium species, as reported in the literature (*Chem. Commun.*, 2015, 51, 8027).

### 3.4 Plausible mechanism of oxidative nucleophilic allylation

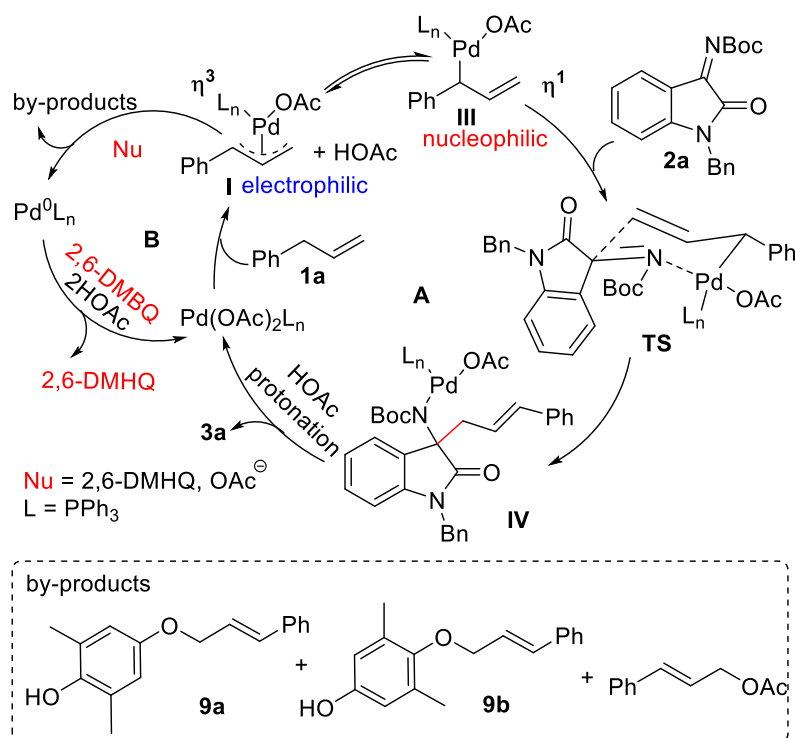

## 4. General procedure for the oxidative nucleophilic allylation

### 4.1 General procedure for the oxidative nucleophilic allylation of alkenes **1** and isatin-derived ketimines **2**

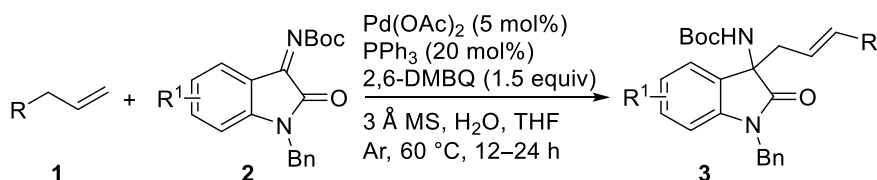

**General procedure:** Isatin-derived ketimine **2** (0.1 mmol),  $\text{Pd}(\text{OAc})_2$  (0.005 mmol, 5 mol%),  $\text{PPh}_3$  (0.02 mmol, 20 mol%), 2,6-DMBQ (0.15 mmol, 1.5 equiv), 3 Å MS (50 mg) and alkene **1** (0.25 mmol, 2.5 equiv) were added to a 10 mL Schlenk tube, and the tube was evacuated and back-filled three times with argon. Then  $\text{H}_2\text{O}$  (2  $\mu\text{L}$ ) and distilled THF (2.0 mL) were added by syringe, and the tube was evacuated and back-filled three times with argon again. The Schlenk tube was tightly capped. The mixture was stirred at indicated temperature for 12–24 h. After completion (monitored by TLC), the reaction was quenched by saturated sodium carbonate solution, and the mixture was stirred vigorously for 30 min, then extracted with EtOAc. The combined organic phases were evaporated under vacuo. The crude reaction mixture was purified by flash chromatography on silica gel (petroleum ether/EtOAc) to give the product **3**.

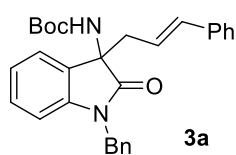

**Tert-butyl (1-benzyl-3-cinnamyl-2-oxoindolin-3-yl)carbamate (3a):**

**Tert-butyl (1-benzyl-2-oxoindolin-3-ylidene)carbamate 2a** (33.6 mg, 0.0999 mmol), Pd(OAc)<sub>2</sub> (1.2 mg, 0.0053 mmol, 5 mol%), PPh<sub>3</sub> (5.2 mg, 0.020 mmol, 20 mol%), 2,6-DMBQ (20.4 mg, 0.150 mmol, 1.5 equiv), 3 Å MS (50 mg) and allylbenzene **1a** (29.5 mg, 0.250 mmol, 2.5 equiv) were added to a 10 mL Schlenk tube, and the tube was evacuated and back-filled three times with argon. Then H<sub>2</sub>O (2 μL) and distilled THF (2.0 mL) were added by syringe, and the tube was evacuated and back-filled three times with argon again. The Schlenk tube was tightly capped. The reaction mixture was stirred at 60 °C for 12 h. After completion (monitored by TLC), the reaction was quenched by saturated sodium carbonate solution, and the mixture was stirred vigorously for 30 min, then extracted with EtOAc. The combined organic phases were evaporated under vacuo. The crude reaction mixture was purified by flash chromatography on silica gel (petroleum ether/EtOAc = 7:1) to give the product **3a**: 31.0 mg (0.0682 mmol), as a white solid, 68% yield; m.p. 158–160 °C; <sup>1</sup>H NMR (400 MHz, CDCl<sub>3</sub>): δ (ppm) 7.36–7.20 (m, 8H), 7.21–7.13 (m, 2H), 7.13–7.02 (m, 3H), 6.66 (d, *J* = 7.6 Hz, 1H), 6.51 (d, *J* = 16.0 Hz, 1H), 6.12–5.79 (m, 1H), 5.42–5.05 (m, 2H), 4.63 (brs, 1H), 2.82 (dd, *J* = 13.2 Hz, 7.2 Hz, 1H), 2.70 (dd, *J* = 13.2 Hz, 7.6 Hz, 1H), 1.26 (s, 9H); <sup>13</sup>C NMR (100 MHz, CDCl<sub>3</sub>): δ (ppm) 176.7, 153.8, 142.5, 136.5, 135.9, 135.7, 130.4, 128.8, 128.7, 128.6, 127.8, 127.4, 127.2, 126.5, 122.73, 122.65, 121.0, 109.3, 80.5, 61.5, 44.2, 41.6, 28.1; HRMS (ESI-TOF) *m/z*: [M + Na]<sup>+</sup> Calcd for [C<sub>29</sub>H<sub>30</sub>N<sub>2</sub>O<sub>3</sub> + Na]<sup>+</sup> 477.2149; Found 477.2148.

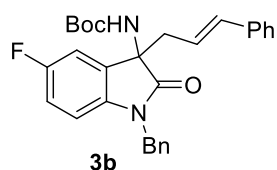

**Tert-butyl (1-benzyl-3-cinnamyl-5-fluoro-2-oxoindolin-3-yl)carbamate**

**(3b):** **Tert-butyl (1-benzyl-5-fluoro-2-oxoindolin-3-ylidene)carbamate 2b**

(35.4 mg, 0.0999 mmol), Pd(OAc)<sub>2</sub> (1.2 mg, 0.0053 mmol, 5 mol%), PPh<sub>3</sub>

(5.2 mg, 0.020 mmol, 20 mol%), 2,6-DMBQ (20.4 mg, 0.150 mmol, 1.5

equiv), 3 Å MS (50 mg) and allylbenzene **1a** (29.5 mg, 0.250 mmol, 2.5 equiv) were added to a 10 mL Schlenk tube, and the tube was evacuated and back-filled three times with argon. Then H<sub>2</sub>O (2 μL) and distilled THF (2.0 mL) were added by syringe, and the tube was evacuated and back-filled three times with argon again. The Schlenk tube was tightly capped. The reaction mixture was stirred at 60 °C for 12 h. After completion (monitored by TLC), the reaction was quenched by saturated sodium carbonate solution, and the mixture was stirred vigorously for 30 min, then extracted with EtOAc. The combined organic phases were evaporated under vacuo. The crude reaction mixture

was purified by flash chromatography on silica gel (petroleum ether/EtOAc = 7:1) to give the product **3b**: 30.5 mg (0.0645 mmol), as a white solid, 65% yield; m.p. 134–136 °C; <sup>1</sup>H NMR (400 MHz, CDCl<sub>3</sub>): δ (ppm) 7.36–7.21 (m, 7H), 7.20–7.02 (m, 4H), 6.86 (td, *J* = 8.8 Hz, 2.4 Hz, 1H), 6.59–6.54 (m, 1H), 6.51 (d, *J* = 15.6 Hz, 1H), 6.02–5.83 (m, 1H), 5.35–5.06 (m, 2H), 4.66 (s, 1H), 2.81 (dd, *J* = 13.2 Hz, 7.2 Hz, 1H), 2.71 (dd, *J* = 13.2 Hz, 8.0 Hz, 1H), 1.30 (s, 9H); <sup>13</sup>C NMR (100 MHz, CDCl<sub>3</sub>): δ (ppm) 176.5, 159.3 (<sup>1</sup>*J*<sub>FC</sub> = 241.2 Hz), 153.7, 138.4, 136.3 (<sup>3</sup>*J*<sub>FC</sub> = 5.6 Hz), 135.4, 128.8, 128.7, 128.0, 127.5, 127.2, 126.5, 120.4, 115.0 (<sup>2</sup>*J*<sub>FC</sub> = 23.6 Hz), 110.9 (<sup>2</sup>*J*<sub>FC</sub> = 24.9 Hz), 109.9, 80.8, 61.8, 44.3, 41.5, 28.1; <sup>19</sup>F NMR (376 MHz, CDCl<sub>3</sub>): δ (ppm) –120.3; HRMS (ESI-TOF) *m/z*: [M + Na]<sup>+</sup> Calcd for [C<sub>29</sub>H<sub>29</sub>FN<sub>2</sub>O<sub>3</sub> + Na]<sup>+</sup> 495.2054; Found 495.2054.

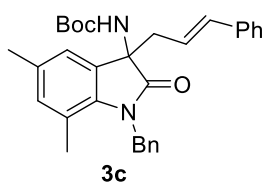

**Tert-butyl (1-benzyl-3-cinnamyl-5,7-dimethyl-2-oxoindolin-3-yl)**

**carbamate (3c):** *Tert*-butyl (1-benzyl-5,7-dimethyl-2-oxoindolin-3-ylidene)-carbamate **2c** (36.4 mg, 0.0999 mmol), Pd(OAc)<sub>2</sub> (1.2 mg, 0.0053 mmol, 5 mol%), PPh<sub>3</sub> (5.2 mg, 0.020 mmol, 20 mol%), 2,6-DMBQ (20.4 mg, 0.150

mmol, 1.5 equiv), 3Å MS (50 mg) and allylbenzene **1a** (29.5 mg, 0.250 mmol, 2.5 equiv) were added to a 10 mL Schlenk tube, and the tube was evacuated and back-filled three times with argon. Then H<sub>2</sub>O (2 μL) and distilled THF (2.0 mL) were added by syringe, and the tube was evacuated and back-filled three times with argon again. The Schlenk tube was tightly capped. The reaction mixture was stirred at 60 °C for 12 h. After completion (monitored by TLC), the reaction was quenched by saturated sodium carbonate solution, and the mixture was stirred vigorously for 30 min, then extracted with EtOAc. The combined organic phases were evaporated under vacuo. The crude reaction mixture was purified by flash chromatography on silica gel (petroleum ether/EtOAc = 7:1) to give the product **3c**: 31.4 mg (0.0651 mmol), as a yellow solid, 65% yield; m.p. 193–195 °C; <sup>1</sup>H NMR (400 MHz, CDCl<sub>3</sub>): δ (ppm) 7.36–7.23 (m, 5H), 7.24–7.17 (m, 2H), 7.18–7.05 (m, 3H), 7.00 (s, 1H), 6.77 (s, 1H), 6.53 (d, *J* = 16.0 Hz, 1H), 6.18–5.96 (m, 1H), 5.36–5.13 (m, 2H), 5.04 (s, 1H), 2.78 (dd, *J* = 13.2 Hz, 6.8 Hz, 1H), 2.69 (dd, *J* = 13.2 Hz, 8.0 Hz, 1H), 2.29 (s, 3H), 2.16 (s, 3H), 1.30 (s, 9H); <sup>13</sup>C NMR (100 MHz, CDCl<sub>3</sub>): δ (ppm) 177.6, 153.8, 138.0, 137.8, 136.6, 135.8, 133.3, 132.1, 131.4, 128.7, 128.6, 127.8, 126.9, 126.5, 125.6, 125.8, 121.4, 119.5, 80.4, 60.8, 45.4, 42.2, 28.1, 20.9, 18.6; HRMS (ESI-TOF) *m/z*: [M + Na]<sup>+</sup> Calcd for [C<sub>31</sub>H<sub>34</sub>N<sub>2</sub>O<sub>3</sub> + Na]<sup>+</sup> 505.2462; Found 505.2461.

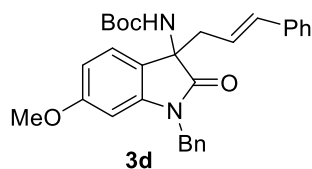

**Tert-butyl (1-benzyl-3-cinnamyl-6-methoxy-2-oxoindolin-3-yl)carbamate (3d):**

*Tert*-butyl (1-benzyl-6-methoxy-2-oxoindolin-3-ylidene) carbamate **2d** (36.6 mg, 0.0999 mmol), Pd(OAc)<sub>2</sub> (1.2 mg, 0.0053 mmol, 5 mol%), PPh<sub>3</sub> (5.2 mg, 0.020 mmol, 20 mol%), 2,6-DMBQ (20.4 mg, 0.150 mmol, 1.5 equiv), 3 Å MS (50 mg) and allylbenzene **1a** (29.5 mg, 0.250 mmol, 2.5 equiv) were added to a 10 mL Schlenk tube, and the tube was evacuated and back-filled three times with argon. Then H<sub>2</sub>O (2 μL) and distilled THF (2.0 mL) were added by syringe, and the tube was evacuated and back-filled three times with argon again. The Schlenk tube was tightly capped. The reaction mixture was stirred at 60 °C for 12 h. After completion (monitored by TLC), the reaction was quenched by saturated sodium carbonate solution, and the mixture was stirred vigorously for 30 min, then extracted with EtOAc. The combined organic phases were evaporated under vacuo. The crude reaction mixture was purified by flash chromatography on silica gel (petroleum ether/EtOAc = 6:1) to give the product **3d**: 32.3 mg (0.0667 mmol), as a white solid, 67% yield; m.p. 134–136 °C; <sup>1</sup>H NMR (400 MHz, CDCl<sub>3</sub>): δ (ppm) 7.34–7.18 (m, 8H), 7.15 (t, *J* = 7.2 Hz, 1H), 7.08 (t, *J* = 7.2 Hz, 2H), 6.58–6.53 (m, 1H), 6.51 (d, *J* = 15.2 Hz, 1H), 6.25 (d, *J* = 2.0 Hz, 1H), 6.06–5.86 (m, 1H), 5.41–5.09 (m, 2H), 4.60 (s, 1H), 3.71 (s, 3H), 2.80 (dd, *J* = 13.2 Hz, 7.2 Hz, 1H), 2.68 (dd, *J* = 13.2 Hz, 8.4 Hz, 1H), 1.28 (s, 9H); <sup>13</sup>C NMR (100 MHz, CDCl<sub>3</sub>): δ (ppm) 177.2, 160.4, 153.8, 143.8, 136.5, 135.8, 135.7, 128.7, 128.6, 127.8, 127.4, 127.2, 126.5, 123.5, 122.3, 121.3, 106.2, 97.5, 80.4, 61.2, 55.4, 44.2, 41.7, 28.2; HRMS (ESI-TOF) *m/z*: [M + Na]<sup>+</sup> Calcd for [C<sub>30</sub>H<sub>32</sub>N<sub>2</sub>O<sub>4</sub> + Na]<sup>+</sup> 507.2254; Found 507.2249.

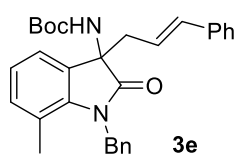

**Tert-butyl (1-benzyl-3-cinnamyl-7-methyl-2-oxoindolin-3-yl)carbamate**

**(3e):** *Tert*-butyl (1-benzyl-7-methyl-2-oxoindolin-3-ylidene)carbamate **2e** (35.0 mg, 0.0999 mmol), Pd(OAc)<sub>2</sub> (1.2 mg, 0.0053 mmol, 5 mol%), PPh<sub>3</sub> (5.2 mg, 0.020 mmol, 20 mol%), 2,6-DMBQ (20.4 mg, 0.150 mmol, 1.5 equiv), 3 Å MS (50 mg) and allylbenzene **1a** (29.5 mg, 0.250 mmol, 2.5 equiv) were added to a 10 mL Schlenk tube, and the tube was evacuated and back-filled three times with argon. Then H<sub>2</sub>O (2 μL) and distilled THF (2.0 mL) were added by syringe, and the tube was evacuated and back-filled three times with argon again. The Schlenk tube was tightly capped. The reaction mixture was stirred at 60 °C for 12 h. After completion (monitored by TLC), the reaction was quenched by saturated sodium carbonate solution, and the mixture was stirred vigorously for 30 min, then extracted with EtOAc. The

combined organic phases were evaporated under vacuo. The crude reaction mixture was purified by flash chromatography on silica gel (petroleum ether/EtOAc = 7:1) to give the product **3e**: 30.2 mg (0.06444 mmol), as a white solid, 64% yield; m.p. 187–189 °C; <sup>1</sup>H NMR (400 MHz, CDCl<sub>3</sub>): δ (ppm) 7.43–7.06 (m, 11H), 7.05–6.92 (m, 2H), 6.53 (d, *J* = 15.8 Hz, 1H), 6.24–5.94 (m, 1H), 5.39–5.18 (m, 1H), 5.05 (s, 1H), 2.80 (dd, *J* = 13.2 Hz, 6.8 Hz, 1H), 2.70 (dd, *J* = 13.2 Hz, 8.0 Hz, 1H), 2.22 (s, 3H), 1.29 (s, 9H); <sup>13</sup>C NMR (100 MHz, CDCl<sub>3</sub>): δ (ppm) 177.7, 153.7, 140.5, 137.8, 136.5, 135.9, 132.8, 131.3, 128.7, 128.6, 127.8, 126.9, 126.5, 125.8, 122.7, 121.2, 120.7, 119.8, 80.4, 60.8, 45.4, 42.1, 28.1, 18.2; HRMS (ESI-TOF) *m/z*: [M + Na]<sup>+</sup> Calcd for [C<sub>30</sub>H<sub>32</sub>N<sub>2</sub>O<sub>3</sub> + Na]<sup>+</sup> 491.2305; Found 491.2305.

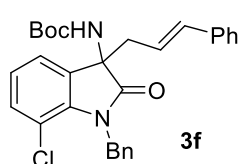

**Tert-butyl (1-benzyl-7-chloro-3-cinnamyl-2-oxoindolin-3-yl)carbamate (3f):**

**Tert-butyl (1-benzyl-7-chloro-2-oxoindolin-3-ylidene)carbamate 2f** (37.1 mg, 0.100 mmol), Pd(OAc)<sub>2</sub> (1.2 mg, 0.0053 mmol, 5 mol%), PPh<sub>3</sub> (5.2 mg, 0.020 mmol, 20 mol%), 2,6-DMBQ (20.4 mg, 0.150 mmol, 1.5 equiv), 3 Å MS (50 mg) and allylbenzene **1a** (29.5 mg, 0.250 mmol, 2.5 equiv) were added to a 10 mL Schlenk tube, and the tube was evacuated and back-filled three times with argon. Then H<sub>2</sub>O (2 μL) and distilled THF (2.0 mL) were added by syringe, and the tube was evacuated and back-filled three times with argon again. The Schlenk tube was tightly capped. The reaction mixture was stirred at 60 °C for 12 h. After completion (monitored by TLC), the reaction was quenched by saturated sodium carbonate solution, and the mixture was stirred vigorously for 30 min, then extracted with EtOAc. The combined organic phases were evaporated under vacuo. The crude reaction mixture was purified by flash chromatography on silica gel (petroleum ether/EtOAc = 7:1) to give the product **3f**: 31.7 mg (0.0648 mmol), as a white solid, 65% yield; m.p. 161–164 °C; <sup>1</sup>H NMR (400 MHz, CDCl<sub>3</sub>): δ (ppm) 7.37–7.23 (m, 7H), 7.23–7.09 (m, 5H), 7.00 (t, *J* = 7.6 Hz, 1H), 6.50 (d, *J* = 15.8 Hz, 1H), 6.14–5.90 (m, 1H), 5.51–5.08 (m, 3H), 2.77 (dd, *J* = 13.6 Hz, 7.2 Hz, 1H), 2.67 (dd, *J* = 13.2 Hz, 8.0 Hz, 1H), 1.29 (s, 9H); <sup>13</sup>C NMR (100 MHz, CDCl<sub>3</sub>): δ (ppm) 177.3, 153.7, 138.6, 137.6, 136.4, 136.3, 133.6, 131.3, 128.6, 128.4, 128.0, 126.9, 126.51, 126.47, 123.5, 121.2, 120.4, 115.6, 80.8, 60.9, 45.2, 41.8, 28.1; HRMS (ESI-TOF) *m/z*: [M + Na]<sup>+</sup> Calcd for [C<sub>29</sub>H<sub>29</sub><sup>35</sup>ClN<sub>2</sub>O<sub>3</sub> + Na]<sup>+</sup> 511.1759; Found 511.1758; Calcd for [C<sub>29</sub>H<sub>29</sub><sup>37</sup>ClN<sub>2</sub>O<sub>3</sub> + Na]<sup>+</sup> 513.1729; Found 513.1743.

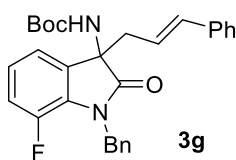

**Tert-butyl (1-benzyl-3-cinnamyl-7-fluoro-2-oxoindolin-3-yl)carbamate (3g):**

**Tert-butyl (1-benzyl-7-fluoro-2-oxoindolin-3-ylidene)carbamate 2g** (35.4 mg, 0.0999 mmol), Pd(OAc)<sub>2</sub> (1.2 mg, 0.0053 mmol, 5 mol%), PPh<sub>3</sub> (5.2 mg, 0.020

mmol, 20 mol%), 2,6-DMBQ (20.4 mg, 0.150 mmol, 1.5 equiv), 3 Å MS (50 mg) and allylbenzene **1a** (29.5 mg, 0.250 mmol, 2.5 equiv) were added to a 10 mL Schlenk tube, and the tube was evacuated and back-filled three times with argon. Then H<sub>2</sub>O (2 μL) and distilled THF (2.0 mL) were added by syringe, and the tube was evacuated and back-filled three times with argon again. The Schlenk tube was tightly capped. The reaction mixture was stirred at 60 °C for 12 h. After completion (monitored by TLC), the reaction was quenched by saturated sodium carbonate solution, and the mixture was stirred vigorously for 30 min, then extracted with EtOAc. The combined organic phases were evaporated under vacuo. The crude reaction mixture was purified by flash chromatography on silica gel (petroleum ether/EtOAc = 8:1) to give the product **3g**: 28.2 mg (0.0597 mmol), as a white solid, 60% yield; m.p. 172–174 °C; <sup>1</sup>H NMR (400 MHz, CDCl<sub>3</sub>): δ (ppm) 7.34 (d, *J* = 7.2 Hz, 2H), 7.31–7.19 (m, 5H), 7.19–7.11 (m, 3H), 7.08 (d, *J* = 6.8 Hz, 1H), 7.05–6.88 (m, 2H), 6.48 (d, *J* = 16.0 Hz, 1H), 6.06–5.87 (m, 1H), 5.38–5.07 (m, 2H), 4.92 (s, 1H), 2.76 (dd, *J* = 13.6 Hz, 7.6 Hz, 1H), 2.65 (dd, *J* = 13.6 Hz, 8.0 Hz, 1H), 1.26 (s, 9H); <sup>13</sup>C NMR (100 MHz, CDCl<sub>3</sub>): δ (ppm) 176.4, 153.7, 147.5 (<sup>1</sup>*J*<sub>FC</sub> = 244.5 Hz), 137.0, 136.3, 136.2, 129.0 (<sup>3</sup>*J*<sub>FC</sub> = 8.8 Hz), 128.6, 128.5, 127.9, 127.4 (<sup>3</sup>*J*<sub>FC</sub> = 8.8 Hz), 126.5, 123.33, 123.26, 120.4, 118.6 (<sup>4</sup>*J*<sub>FC</sub> = 3.2 Hz), 117.0 (<sup>2</sup>*J*<sub>FC</sub> = 19.7 Hz), 80.8, 61.5, 45.7, 45.6, 41.7, 28.0; <sup>19</sup>F NMR (376 MHz, CDCl<sub>3</sub>): δ (ppm) –133.8; HRMS (ESI-TOF) *m/z*: [M + Na]<sup>+</sup> Calcd for [C<sub>29</sub>H<sub>29</sub>FN<sub>2</sub>O<sub>3</sub> + Na]<sup>+</sup> 495.2054; Found 495.2055.

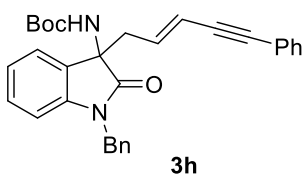

**Tert-butyl (E)-(1-benzyl-2-oxo-3-(5-phenylpent-2-en-4-yn-1-yl)**

**indolin-3-yl)carbamate (3h):** **Tert-butyl (1-benzyl-2-oxoindolin-3-ylidene) carbamate 2a** (33.6 mg, 0.0999 mmol), Pd(OAc)<sub>2</sub> (1.2 mg, 0.0053 mmol, 5 mol%), PPh<sub>3</sub> (5.2 mg, 0.020 mmol, 20 mol%), 2,6-DMBQ (20.4

mg, 0.150 mmol, 1.5 equiv), 3 Å MS (50 mg) and pent-4-en-1-yn-1-ylbenzene **1b** (35.6 mg, 0.250 mmol, 2.5 equiv) were added to a 10 mL Schlenk tube, and the tube was evacuated and back-filled three times with argon. Then H<sub>2</sub>O (2 μL) and distilled THF (2.0 mL) were added by syringe, and the tube was evacuated and back-filled three times with argon again. The Schlenk tube was tightly capped. The reaction mixture was stirred at 80 °C for 24 h. After completion (monitored by TLC),



the reaction was quenched by saturated sodium carbonate solution, and the mixture was stirred vigorously for 30 min, then extracted with EtOAc. The combined organic phases were evaporated under vacuo. The crude reaction mixture was purified by flash chromatography on silica gel (petroleum ether/EtOAc = 7:1) to give the product **3h**: 20.2 mg (0.0422 mmol), as a yellow solid, 42% yield; m.p. 122–125 °C; <sup>1</sup>H NMR (400 MHz, CDCl<sub>3</sub>): δ (ppm) 7.46–7.38 (m, 2H), 7.39–7.24 (m, 8H), 7.24–7.14 (m, 2H), 7.05 (t, *J* = 7.4 Hz, 1H), 6.69 (d, *J* = 7.6 Hz, 1H), 6.08–5.93 (m, 1H), 5.85 (d, *J* = 15.8 Hz, 1H), 5.32–5.08 (m, 2H), 4.69 (s, 1H), 2.78 (dd, *J* = 13.2 Hz, 7.2 Hz, 1H), 2.63 (dd, *J* = 13.2 Hz, 7.6 Hz, 1H), 1.26 (s, 9H); <sup>13</sup>C NMR (100 MHz, CDCl<sub>3</sub>): δ (ppm) 176.4, 153.7, 142.4, 135.7, 134.7, 131.6, 130.1, 128.91, 128.85, 128.39, 128.37, 127.5, 127.3, 123.0, 122.9, 122.8, 116.0, 109.4, 90.1, 87.2, 80.6, 61.2, 44.2, 41.5, 28.1; HRMS (ESI-TOF) *m/z*: [M + Na]<sup>+</sup> Calcd for [C<sub>31</sub>H<sub>30</sub>N<sub>2</sub>O<sub>3</sub> + Na]<sup>+</sup> 501.2149; Found 501.2140.

#### 4.2 General procedure for the oxidative nucleophilic allylation of alkenes **1** and pyrazoledione-derived ketimines **4**

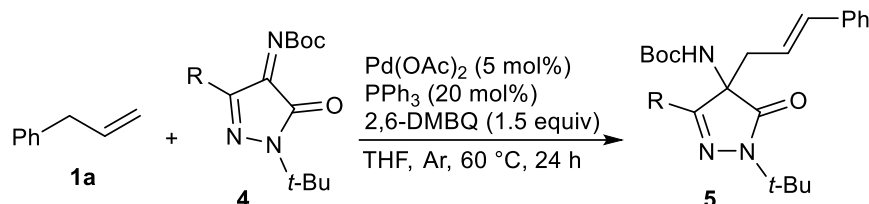

**General procedure:** Pyrazoledione-derived ketimine **4** (0.1 mmol), Pd(OAc)<sub>2</sub> (0.005 mmol, 5 mol%), PPh<sub>3</sub> (0.02 mmol, 20 mol%), 2,6-DMBQ (0.15 mmol, 1.5 equiv) and allylbenzene **1a** (0.25 mmol, 2.5 equiv) were added to a 10 mL Schlenk tube, and the tube was evacuated and back-filled three times with argon. Then distilled THF (1.0 mL) was added by syringe, and the tube was evacuated and back-filled three times with argon again. The Schlenk tube was tightly capped. The reaction mixture was stirred at 60 °C for 24 h. After completion (monitored by TLC), the reaction was quenched by saturated sodium carbonate solution, and the mixture was stirred vigorously for 30 min, then extracted with EtOAc. The combined organic phases were evaporated under vacuo. The crude reaction mixture was purified by flash chromatography on silica gel (petroleum ether/EtOAc) to give the product **5**.

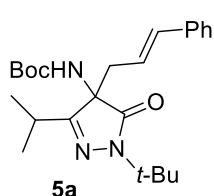

**Tert-butyl (1-(tert-butyl)-4-cinnamyl-3-isopropyl-5-oxo-4,5-dihydro-1H-pyrazol-4-yl)carbamate (5a):** *Tert*-butyl (1-(*tert*-butyl)-3-isopropyl-5-oxo-1,5-dihydro-4*H*-pyrazol-4-ylidene)carbamate **4a** (29.5 mg, 0.0999 mmol),

Pd(OAc)<sub>2</sub> (1.2 mg, 0.0053 mmol, 5 mol%), PPh<sub>3</sub> (5.2 mg, 0.020 mmol, 20 mol%), 2,6-DMBQ (20.4 mg, 0.150 mmol, 1.5 equiv) and allylbenzene **1a** (29.5 mg, 0.250 mmol, 2.5 equiv) were added to a 10 mL Schlenk tube, and the tube was evacuated and back-filled three times with argon. Then distilled THF (1.0 mL) was added by syringe, and the tube was evacuated and back-filled three times with argon again. The Schlenk tube was tightly capped. The reaction mixture was stirred at 60 °C for 24 h. After completion (monitored by TLC), the reaction was quenched by saturated sodium carbonate solution, and the mixture was stirred vigorously for 30 min, then extracted with EtOAc. The combined organic phases were evaporated under vacuo. The crude reaction mixture was purified by flash chromatography on silica gel (petroleum ether/EtOAc = 8:1) to give the product **5a**: 30.5 mg (0.0737 mmol), as a yellow solid, 74% yield; m.p. 129–132 °C; <sup>1</sup>H NMR (400 MHz, CDCl<sub>3</sub>): δ (ppm) 7.31–7.28 (m, 4H), 7.27–7.19 (m, 1H), 6.49 (d, *J* = 15.6 Hz, 1H), 6.13–5.73 (m, 1H), 5.02 (s, 1H), 2.69–2.59 (m, 1H), 2.55 (d, *J* = 7.6 Hz, 2H), 1.44 (s, 9H), 1.40 (s, 9H), 1.26 (d, *J* = 6.8 Hz, 3H), 1.22 (d, *J* = 6.8 Hz, 3H); <sup>13</sup>C NMR (100 MHz, CDCl<sub>3</sub>): δ (ppm) 173.9, 162.8, 153.6, 136.5, 135.7, 128.6, 127.8, 126.6, 120.1, 65.7, 57.5, 38.2, 28.2, 28.1, 20.8, 20.4; HRMS (ESI-TOF) *m/z*: [M + Na]<sup>+</sup> Calcd for [C<sub>24</sub>H<sub>35</sub>N<sub>3</sub>O<sub>3</sub> + Na]<sup>+</sup> 436.2571; Found 436.2571.

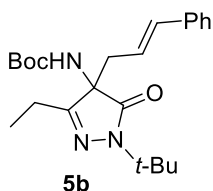

**Tert-butyl (1-(tert-butyl)-4-cinnamyl-3-ethyl-5-oxo-4,5-dihydro-1H-pyrazol-4-yl)carbamate (5b):** *Tert*-butyl (1-(*tert*-butyl)-3-ethyl-5-oxo-1,5-dihydro-4H-pyrazol-4-ylidene)carbamate **4b** (28.1 mg, 0.0999 mmol), Pd(OAc)<sub>2</sub> (1.2 mg, 0.0053 mmol, 5 mol%), PPh<sub>3</sub> (5.2 mg, 0.020 mmol, 20 mol%), 2,6-DMBQ (20.4

mg, 0.150 mmol, 1.5 equiv) and allylbenzene **1a** (29.5 mg, 0.250 mmol, 2.5 equiv) were added to a 10 mL Schlenk tube, and the tube was evacuated and back-filled three times with argon. Then distilled THF (1.0 mL) was added by syringe, and the tube was evacuated and back-filled three times with argon again. The Schlenk tube was tightly capped. The reaction mixture was stirred at 60 °C for 24 h. After completion (monitored by TLC), the reaction was quenched by saturated sodium carbonate solution, and the mixture was stirred vigorously for 30 min, then extracted with EtOAc. The combined organic phases were evaporated under vacuo. The crude reaction mixture was purified by flash chromatography on silica gel (petroleum ether/EtOAc = 8:1) to give the product **5b**: 30.1 mg (0.0753 mmol), as a white solid, 75% yield; m.p. 112–115 °C; <sup>1</sup>H NMR (400 MHz, CDCl<sub>3</sub>): δ (ppm) 7.52–7.09 (m, 5H), 6.49 (d, *J* = 15.6 Hz, 1H), 6.06–5.83 (m, 1H), 5.08 (s, 1H), 2.59–2.44 (m, 2H), 2.39–2.28 (m, 2H), 1.46 (s, 9H), 1.39 (s, 9H), 1.23 (t, *J* = 7.6 Hz, 3H); <sup>13</sup>C NMR

(100 MHz, CDCl<sub>3</sub>):  $\delta$  (ppm) 174.0, 160.6, 153.7, 136.5, 135.7, 128.6, 127.8, 126.4, 126.3, 120.0, 80.7, 65.6, 57.4, 38.3, 28.2, 28.1, 21.1, 9.5; HRMS (ESI-TOF)  $m/z$ :  $[M + Na]^+$  Calcd for  $[C_{23}H_{33}N_3O_3 + Na]^+$  422.2414; Found 422.2414.

### 4.3 General procedure for the oxidative nucleophilic allylation of alkenes **1** and isoquinoline-1,3,4-trione-derived ketimines **6**

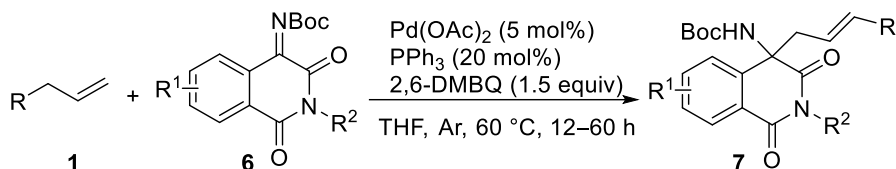

**General procedure:** Isoquinoline-1,3,4-trione-derived ketimine **6** (0.1 mmol), Pd(OAc)<sub>2</sub> (0.005 mmol, 5 mol%), PPh<sub>3</sub> (0.02 mmol, 20 mol%), 2,6-DMBQ (0.15 mmol, 1.5 equiv) and alkene **1** (0.25 mmol, 2.5 equiv) were added to a 10 mL Schlenk tube, and the tube was evacuated and back-filled three times with argon. Then distilled THF (1.0 mL) was added by syringe, and the tube was evacuated and back-filled three times with argon again. The Schlenk tube was tightly capped. The reaction mixture was stirred at indicated temperature for 12–60 h. After completion (monitored by TLC), the reaction was quenched by saturated sodium carbonate solution, and the mixture was stirred vigorously for 30 min, then extracted with EtOAc. The combined organic phases were evaporated under vacuo. The crude reaction mixture was purified by flash chromatography on silica gel (petroleum ether/EtOAc) to give the product **7**.

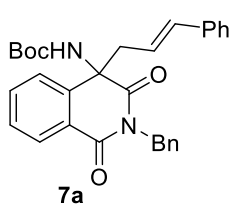

**Tert-butyl (2-benzyl-4-cinnamyl-1,3-dioxo-1,2,3,4-tetrahydroisoquinolin-4-yl)carbamate (7a):** *Tert*-butyl (2-benzyl-1,3-dioxo-2,3-dihydroisoquinolin-4(1*H*)-ylidene)carbamate **6a** (36.4 mg, 0.0999 mmol), Pd(OAc)<sub>2</sub> (1.2 mg, 0.0053 mmol, 5 mol%), PPh<sub>3</sub> (5.2 mg, 0.020 mmol, 20 mol%), 2,6-DMBQ

(20.4 mg, 0.150 mmol, 1.5 equiv) and allylbenzene **1a** (29.5 mg, 0.250 mmol, 2.5 equiv) were added to a 10 mL Schlenk tube, and the tube was evacuated and back-filled three times with argon. Then distilled THF (1.0 mL) was added by syringe, and the tube was evacuated and back-filled three times with argon again. The Schlenk tube was tightly capped. The reaction mixture was stirred at 60 °C for 12 h. After completion (monitored by TLC), the reaction was quenched by saturated sodium carbonate solution, and the mixture was stirred vigorously for 30 min, then extracted with EtOAc. The combined organic phases were evaporated under vacuo. The crude reaction mixture was purified by flash chromatography on silica gel (petroleum ether/EtOAc = 8:1) to give the

product **7a**: 44.9 mg (0.0930 mmol), as a white solid, 93% yield; m.p. 139–141 °C; <sup>1</sup>H NMR (400 MHz, CDCl<sub>3</sub>): δ (ppm) 8.21 (d, *J* = 7.6 Hz, 1H), 7.72–7.54 (m, 2H), 7.53–7.41 (m, 3H), 7.31–7.14 (m, 6H), 7.03 (d, *J* = 6.8 Hz, 2H), 6.16 (d, *J* = 15.6 Hz, 1H), 5.65 (s, 1H), 5.58–5.43 (m, 1H), 5.30–4.98 (m, 2H), 2.85–2.50 (m, 2H), 1.53–0.68 (brs, 9H); <sup>13</sup>C NMR (100 MHz, CDCl<sub>3</sub>): δ (ppm) 173.7, 163.7, 136.9, 136.5, 136.04, 134.00, 128.9, 128.5, 128.4, 128.04, 128.01, 127.5, 126.4, 125.1, 124.5, 119.7, 81.1, 61.7, 47.0, 44.0, 28.1; HRMS (ESI-TOF) *m/z*: [M + Na]<sup>+</sup> Calcd for [C<sub>30</sub>H<sub>30</sub>N<sub>2</sub>O<sub>4</sub> + Na]<sup>+</sup> 505.2098; Found 505.2102.

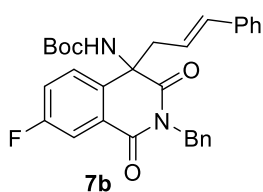

**Tert-butyl (2-benzyl-4-cinnamyl-7-fluoro-1,3-dioxo-1,2,3,4-tetrahydro**

**isoquinolin-4-yl)carbamate (7b):** *Tert*-butyl (2-benzyl-7-fluoro-1,3-dioxo-2,3-dihydroisoquinolin-4(1*H*)-ylidene)carbamate **6b** (38.2 mg, 0.0999 mmol), Pd(OAc)<sub>2</sub> (1.2 mg, 0.0053 mmol, 5 mol%), PPh<sub>3</sub> (5.2 mg, 0.020 mmol, 20 mol%), 2,6-DMBQ (20.4 mg, 0.150 mmol, 1.5 equiv) and allylbenzene **1a** (29.5 mg, 0.250 mmol, 2.5 equiv) were added to a 10 mL Schlenk tube, and the tube was evacuated and back-filled three times with argon. Then distilled THF (1.0 mL) was added by syringe, and the tube was evacuated and back-filled three times with argon again. The Schlenk tube was tightly capped. The reaction mixture was stirred at 60 °C for 12 h. After completion (monitored by TLC), the reaction was quenched by saturated sodium carbonate solution, and the mixture was stirred vigorously for 30 min, then extracted with EtOAc. The combined organic phases were evaporated under vacuo. The crude reaction mixture was purified by flash chromatography on silica gel (petroleum ether/EtOAc = 8:1) to give the product **7b**: 44.0 mg (0.0879 mmol), as a white solid, 88% yield; m.p. 127–129 °C; <sup>1</sup>H NMR (400 MHz, CDCl<sub>3</sub>): δ (ppm) 7.87 (dd, *J* = 8.8 Hz, 2.8 Hz, 1H), 7.58 (dd, *J* = 8.8 Hz, 4.8 Hz, 1H), 7.49–7.41 (m, 1H), 7.35 (td, *J* = 8.0 Hz, 2.8 Hz, 1H), 7.30–7.15 (m, 6H), 7.11–7.00 (m, 2H), 6.16 (d, *J* = 15.6 Hz, 1H), 5.54 (s, 1H), 5.53–5.43 (m, 1H), 5.29–4.96 (m, 2H), 2.91–2.51 (m, 2H), 1.53–0.59 (brs, 9H); <sup>13</sup>C NMR (100 MHz, CDCl<sub>3</sub>): δ (ppm) 173.4, 162.7 (<sup>4</sup>*J*<sub>FC</sub> = 2.6 Hz), 162.1 (<sup>1</sup>*J*<sub>FC</sub> = 248.3 Hz), 136.8, 136.6, 135.9, 129.0, 128.6, 128.4, 128.1, 127.6, 127.1 (<sup>3</sup>*J*<sub>FC</sub> = 7.7 Hz), 127.0–126.6 (m), 126.4, 121.5 (<sup>2</sup>*J*<sub>FC</sub> = 22.4 Hz), 119.3, 115.1 (<sup>2</sup>*J*<sub>FC</sub> = 22.9 Hz), 81.3, 61.4, 47.0, 44.2, 28.0; <sup>19</sup>F NMR (376 MHz, CDCl<sub>3</sub>): δ (ppm) –112.9; HRMS (ESI-TOF) *m/z*: [M + Na]<sup>+</sup> Calcd for [C<sub>30</sub>H<sub>29</sub>FN<sub>2</sub>O<sub>4</sub> + Na]<sup>+</sup> 523.2004; Found 523.2004.

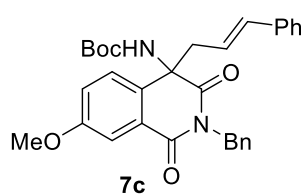

**Tert-butyl (2-benzyl-4-cinnamyl-7-methoxy-1,3-dioxo-1,2,3,4-tetrahydroisoquinolin-4-yl)carbamate (7c):** *Tert*-butyl (2-benzyl-7-methoxy-

1,3-dioxo-2,3-dihydroisoquinolin-4(1*H*)-ylidene)carbamate **6c** (39.4 mg, 0.0999 mmol), Pd(OAc)<sub>2</sub> (1.2 mg, 0.0053 mmol, 5 mol%), PPh<sub>3</sub> (5.2 mg,

0.020 mmol, 20 mol %), 2,6-DMBQ (20.4 mg, 0.150 mmol, 1.5 equiv) and allylbenzene **1a** (29.5 mg, 0.250 mmol, 2.5 equiv) were added to a 10 mL Schlenk tube, and the tube was evacuated and back-filled three times with argon. Then distilled THF (1.0 mL) was added by syringe, and the tube was evacuated and back-filled three times with argon again. The Schlenk tube was tightly capped. The reaction mixture was stirred at 60 °C for 24 h. After completion (monitored by TLC), the reaction was quenched by saturated sodium carbonate solution, and the mixture was stirred vigorously for 30 min, then extracted with EtOAc. The combined organic phases were evaporated under vacuo. The crude reaction mixture was purified by flash chromatography on silica gel (petroleum ether/EtOAc = 7:1) to give the product **7c**: 42.3 mg (0.0825 mmol), as a white solid, 83% yield; m.p. 106–108 °C; <sup>1</sup>H NMR (400 MHz, CDCl<sub>3</sub>): δ (ppm) 7.67 (d, *J* = 2.4 Hz, 1H), 7.53–7.42 (m, 3H), 7.25–7.17 (m, 7H), 7.07–7.01 (m, 2H), 6.19 (d, *J* = 16.0 Hz, 1H), 5.66–5.43 (m, 2H), 5.27–5.01 (m, 2H), 3.87 (s, 3H), 2.84–2.48 (m, 2H), 1.50–0.74 (brs, 9H); <sup>13</sup>C NMR (100 MHz, CDCl<sub>3</sub>): δ (ppm) 173.8, 163.7, 159.2, 136.9, 136.3, 136.1, 134.1, 129.1, 128.5, 128.4, 128.0, 127.4, 126.4, 126.1, 126.0, 122.3, 119.8, 111.0, 81.0, 61.3, 55.6, 47.0, 44.1, 28.0; HRMS (ESI-TOF) *m/z*: [M + Na]<sup>+</sup> Calcd for [C<sub>31</sub>H<sub>32</sub>N<sub>2</sub>O<sub>5</sub> + Na]<sup>+</sup> 535.2203; Found 535.2199.

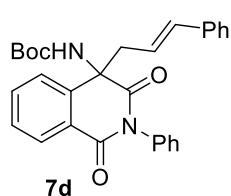

**Tert-butyl (4-cinnamyl-1,3-dioxo-2-phenyl-1,2,3,4-tetrahydroisoquinolin-4-yl)carbamate (7d):** *Tert*-butyl (1,3-dioxo-2-phenyl-2,3-dihydroisoquinolin-

4(1*H*)-ylidene)carbamate **6d** (35.0 mg, 0.0999 mmol), Pd(OAc)<sub>2</sub> (1.2 mg, 0.0053 mmol, 5 mol%), PPh<sub>3</sub> (5.2 mg, 0.020 mmol, 20 mol%), 2,6-DMBQ

(20.4 mg, 0.150 mmol, 1.5 equiv) and allylbenzene **1a** (29.5 mg, 0.250 mmol, 2.5 equiv) were added to a 10 mL Schlenk tube, and the tube was evacuated and back-filled three times with argon. Then distilled THF (1.0 mL) was added by syringe, and the tube was evacuated and back-filled three times with argon again. The Schlenk tube was tightly capped. The reaction mixture was stirred at 60 °C for 24 h. After completion (monitored by TLC), the reaction was quenched by saturated sodium carbonate solution, and the mixture was stirred vigorously for 30 min, then extracted with EtOAc. The combined organic phases were evaporated under vacuo. The crude reaction mixture

was purified by flash chromatography on silica gel (petroleum ether/EtOAc = 8:1) to give the product **7d**: 41.5 mg (0.0886 mmol), as a white solid, 89% yield; m.p. 195–197 °C; <sup>1</sup>H NMR (400 MHz, CDCl<sub>3</sub>): δ (ppm) 8.26 (dd, *J* = 8.0 Hz, 0.8 Hz, 1H), 7.78–7.64 (m, 2H), 7.56–7.48 (m, 1H), 7.47–7.35 (m, 3H), 7.32–7.19 (m, 5H), 7.09 (d, *J* = 6.0 Hz, 2H), 6.44 (d, *J* = 15.6 Hz, 1H), 5.83–5.59 (m, 2H), 2.91 (dd, *J* = 12.8 Hz, 8.8 Hz, 1H), 2.83 (dd, *J* = 12.8 Hz, 6.4 Hz, 1H), 1.53–0.95 (brs, 9H); <sup>13</sup>C NMR (100 MHz, CDCl<sub>3</sub>): δ (ppm) 173.4, 163.9, 136.8, 136.1, 135.3, 134.3, 129.2, 129.1, 128.8, 128.6, 128.5, 128.22, 128.20, 126.5, 125.4, 124.7, 119.8, 81.1, 62.1, 47.1, 28.1; HRMS (ESI-TOF) *m/z*: [M + Na]<sup>+</sup> Calcd for [C<sub>29</sub>H<sub>28</sub>N<sub>2</sub>O<sub>4</sub> + Na]<sup>+</sup> 491.1941; Found 491.1941.

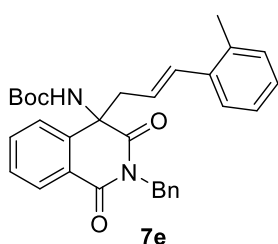

**Tert-butyl (*E*)-(2-benzyl-1,3-dioxo-4-(3-(*o*-tolyl)allyl)-1,2,3,4-tetrahydro**

**isoquinolin-4-yl)carbamate (7e):** *Tert*-butyl (2-benzyl-1,3-dioxo-2,3-dihydro

isoquinolin-4(*1H*)-ylidene)carbamate **6a** (36.4 mg, 0.0999 mmol),

Pd(OAc)<sub>2</sub> (1.2 mg, 0.0053 mmol, 5 mol%), PPh<sub>3</sub> (5.2 mg, 0.020 mmol, 20

mol%), 2,6-DMBQ (20.4 mg, 0.150 mmol, 1.5 equiv) and

1-allyl-2-methylbenzene **1c** (33.1 mg, 0.250 mmol, 2.5 equiv) were added to a 10 mL Schlenk tube, and the tube was evacuated and back-filled three times with argon. Then distilled THF (1.0 mL) was added by syringe, and the tube was evacuated and back-filled three times with argon again. The Schlenk tube was tightly capped. The reaction mixture was stirred at 60 °C for 12 h. After completion (monitored by TLC), the reaction was quenched by saturated sodium carbonate solution, and the mixture was stirred vigorously for 30 min, then extracted with EtOAc. The combined organic phases were evaporated under vacuo. The crude reaction mixture was purified by flash chromatography on silica gel (petroleum ether/EtOAc = 9:1) to give the product **7e**: 46.2 mg (0.0930 mmol), as a yellow solid, 93% yield; m.p. 124–126 °C; <sup>1</sup>H NMR (400 MHz, CDCl<sub>3</sub>): δ (ppm) 8.22 (d, *J* = 8.0 Hz, 1H), 7.71–7.55 (m, 2H), 7.51–7.35 (m, 3H), 7.22–6.86 (m, 7H), 6.34 (d, *J* = 15.6 Hz, 1H), 5.62 (s, 1H), 5.47–5.32 (m, 1H), 5.28–5.03 (m, 2H), 2.85–2.52 (m, 2H), 2.11 (s, 3H), 1.52–0.62 (brs, 9H); <sup>13</sup>C NMR (100 MHz, CDCl<sub>3</sub>): δ (ppm) 173.7, 163.7, 136.8, 135.27, 135.25, 134.6, 134.0, 130.2, 128.9, 128.3, 128.0, 127.9, 127.4, 126.2, 125.9, 125.2, 124.6, 121.0, 81.1, 61.7, 47.3, 44.0, 27.9, 19.6; HRMS (ESI-TOF) *m/z*: [M + Na]<sup>+</sup> Calcd for [C<sub>31</sub>H<sub>32</sub>N<sub>2</sub>O<sub>4</sub> + Na]<sup>+</sup> 519.2254; Found 519.2254.

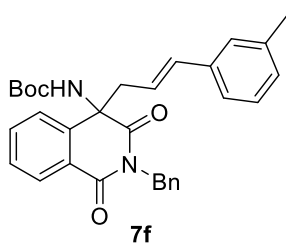

**Tert-butyl (E)-(2-benzyl-1,3-dioxo-4-(3-(*m*-tolyl)allyl)-1,2,3,4-tetrahydroisoquinolin-4-yl)carbamate (7f):** *Tert*-butyl (2-benzyl-1,3-dioxo-

2,3-dihydro isoquinolin-4(*1H*)-ylidene)carbamate **6a** (36.4 mg, 0.0999 mmol), Pd(OAc)<sub>2</sub> (1.2 mg, 0.0053 mmol, 5 mol%), PPh<sub>3</sub> (5.2 mg, 0.020 mmol, 20 mol%), 2,6-DMBQ (20.4 mg, 0.150 mmol, 1.5 equiv) and

1-allyl-3-methylbenzene **1d** (33.1 mg, 0.250 mmol, 2.5 equiv) were added to a 10 mL Schlenk tube, and the tube was evacuated and back-filled three times with argon. Then distilled THF (1.0 mL) was added by syringe, and the tube was evacuated and back-filled three times with argon again. The Schlenk tube was tightly capped. The reaction mixture was stirred at 60 °C for 12 h. After completion (monitored by TLC), the reaction was quenched by saturated sodium carbonate solution, and the mixture was stirred vigorously for 30 min, then extracted with EtOAc. The combined organic phases were evaporated under vacuo. The crude reaction mixture was purified by flash chromatography on silica gel (petroleum ether/EtOAc = 8:1) to give the product **7f**: 46.8 mg (0.0942 mmol), as a white solid, 94% yield; m.p. 130–132 °C; <sup>1</sup>H NMR (400 MHz, CDCl<sub>3</sub>): δ (ppm) 8.21 (dd, *J* = 7.8 Hz, 1.0 Hz, 1H), 7.74–7.55 (m, 2H), 7.52–7.38 (m, 3H), 7.25–7.10 (m, 4H), 7.03 (d, *J* = 7.2 Hz, 1H), 6.95–6.78 (m, 2H), 6.16 (d, *J* = 16.0 Hz, 1H), 5.56 (s, 1H), 5.55–5.46 (m, 1H), 5.29–5.04 (m, 2H), 2.90–2.53 (m, 2H), 2.30 (s, 3H), 1.55–0.54 (brs, 9H); <sup>13</sup>C NMR (100 MHz, CDCl<sub>3</sub>): δ (ppm) 173.6, 163.7, 138.1, 136.9, 136.6, 136.0, 133.9, 128.8, 128.43, 128.36, 128.0, 127.4, 127.2, 125.1, 124.5, 123.5, 119.4, 81.0, 61.7, 47.1, 44.0, 27.9, 21.3; HRMS (ESI-TOF) *m/z*: [M + Na]<sup>+</sup> Calcd for [C<sub>31</sub>H<sub>32</sub>N<sub>2</sub>O<sub>4</sub> + Na]<sup>+</sup> 519.2254; Found 519.2250.

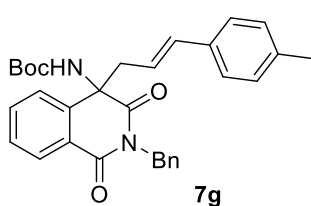

**Tert-butyl (E)-(2-benzyl-1,3-dioxo-4-(3-(*p*-tolyl)allyl)-1,2,3,4-tetrahydroisoquinolin-4-yl)carbamate (7g):** *Tert*-butyl (2-benzyl-1,3-

dioxo-2,3-dihydroisoquinolin-4(*1H*)-ylidene)carbamate **6a** (36.4 mg, 0.0999 mmol), Pd(OAc)<sub>2</sub> (1.2 mg, 0.0053 mmol, 5 mol%), PPh<sub>3</sub> (5.2 mg,

0.020 mmol, 20 mol%), 2,6-DMBQ (20.4 mg, 0.150 mmol, 1.5 equiv) and 1-allyl-4-methylbenzene **1e** (33.1 mg, 0.250 mmol, 2.5 equiv) were added to a 10 mL Schlenk tube, and the tube was evacuated and back-filled three times with argon. Then distilled THF (1.0 mL) was added by syringe, and the tube was evacuated and back-filled three times with argon again. The Schlenk tube was tightly capped. The reaction mixture was stirred at 60 °C for 12 h. After completion (monitored by TLC), the reaction was quenched by saturated sodium carbonate solution, and the mixture was

stirred vigorously for 30 min, then extracted with EtOAc. The combined organic phases were evaporated under vacuo. The crude reaction mixture was purified by flash chromatography on silica gel (petroleum ether/EtOAc = 8:1) to give the product **7g**: 45.5 mg (0.0916 mmol), as a white solid, 92% yield; m.p. 103–106 °C; <sup>1</sup>H NMR (400 MHz, CDCl<sub>3</sub>): δ (ppm) 8.20 (d, *J* = 7.2 Hz, 1H), 7.65 (t, *J* = 7.2 Hz, 1H), 7.58 (d, *J* = 7.6 Hz, 1H), 7.52–7.39 (m, 3H), 7.25–7.16 (m, 3H), 7.04 (d, *J* = 7.6 Hz, 2H), 6.94 (d, *J* = 8.0 Hz, 2H), 6.14 (d, *J* = 15.6 Hz, 1H), 5.54 (s, 1H), 5.52–5.39 (m, 1H), 5.32–5.01 (m, 2H), 2.86–2.51 (m, 2H), 2.31 (s, 3H), 1.51–0.58 (brs, 9H); <sup>13</sup>C NMR (100 MHz, CDCl<sub>3</sub>): δ (ppm) 173.6, 163.7, 137.9, 136.9, 136.4, 134.0, 133.3, 129.2, 129.0, 128.8, 128.4, 128.0, 127.5, 126.3, 125.1, 124.5, 118.5, 81.1, 61.8, 47.1, 44.0, 27.9, 21.2; HRMS (ESI-TOF) *m/z*: [M + Na]<sup>+</sup> Calcd for [C<sub>31</sub>H<sub>32</sub>N<sub>2</sub>O<sub>4</sub> + Na]<sup>+</sup> 519.2254; Found 519.2246.

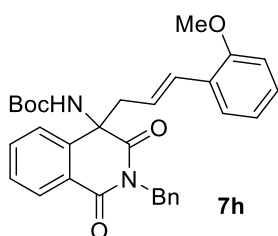

**Tert-butyl (E)-(2-benzyl-4-(3-(2-methoxyphenyl)allyl)-1,3-dioxo-1,2,3,4-tetrahydroisoquinolin-4-yl)carbamate (7h):** *Tert*-butyl (2-benzyl-1,3-dioxo-2,3-dihydroisoquinolin-4(1*H*)-ylidene)carbamate **6a** (36.4 mg, 0.0999 mmol), Pd(OAc)<sub>2</sub> (1.2 mg, 0.0053 mmol, 5 mol%), PPh<sub>3</sub> (5.2 mg, 0.020 mmol, 20 mol%), 2,6-DMBQ (20.4 mg, 0.150 mmol, 1.5 equiv) and 1-allyl-2-methoxybenzene **1f** (37.1 mg, 0.250 mmol, 2.5 equiv) were added to a 10 mL Schlenk tube, and the tube was evacuated and back-filled three times with argon. Then distilled THF (1.0 mL) was added by syringe, and the tube was evacuated and back-filled three times with argon again. The Schlenk tube was tightly capped. The reaction mixture was stirred at 60 °C for 12 h. After completion (monitored by TLC), the reaction was quenched by saturated sodium carbonate solution, and the mixture was stirred vigorously for 30 min, then extracted with EtOAc. The combined organic phases were evaporated under vacuo. The crude reaction mixture was purified by flash chromatography on silica gel (petroleum ether/EtOAc = 7:1) to give the product **7h**: 48.3 mg (0.0942 mmol), as a white solid, 94% yield; m.p. 157–160 °C; <sup>1</sup>H NMR (400 MHz, CDCl<sub>3</sub>): δ (ppm) 8.22 (dd, *J* = 8.0 Hz, 1.6 Hz, 1H), 7.65 (t, *J* = 7.6 Hz, 1H), 7.59 (d, *J* = 8.0 Hz, 1H), 7.51–7.39 (m, 3H), 7.23–7.13 (m, 4H), 7.03 (dd, *J* = 7.6 Hz, 1.6 Hz, 1H), 6.84 (t, *J* = 7.6 Hz, 1H), 6.80 (d, *J* = 8.0 Hz, 1H), 6.54 (d, *J* = 15.8 Hz, 1H), 5.62–5.49 (m, 2H), 5.28–5.09 (m, 2H), 3.75 (s, 3H), 2.90–2.52 (m, 2H), 1.52–0.57 (brs, 9H); <sup>13</sup>C NMR (100 MHz, CDCl<sub>3</sub>): δ (ppm) 173.7, 163.8, 156.6, 136.9, 133.9, 131.5, 129.0, 128.3, 127.9, 127.4, 127.2, 125.22, 125.15, 124.5, 120.6, 120.5, 110.7, 81.0,



61.8, 55.3, 47.5, 44.0, 28.2; HRMS (ESI-TOF)  $m/z$ :  $[M + Na]^+$  Calcd for  $[C_{31}H_{32}N_2O_5 + Na]^+$  535.2203; Found 535.2195.

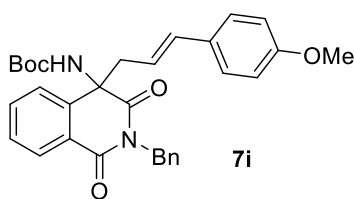

**Tert-butyl (E)-(2-benzyl-4-(3-(4-methoxyphenyl)allyl)-1,3-dioxo-1,2,3,4-tetrahydroisoquinolin-4-yl)carbamate (7i):** *Tert*-butyl

(2-benzyl-1,3-dioxo-2,3-dihydroisoquinolin-4(1*H*)-ylidene)carbamate **6a** (36.4 mg, 0.0999 mmol), Pd(OAc)<sub>2</sub> (1.2 mg, 0.0053 mmol, 5

mol%), PPh<sub>3</sub> (5.2 mg, 0.020 mmol, 20 mol%), 2,6-DMBQ (20.4 mg, 0.150 mmol, 1.5 equiv) and 1-allyl-4-methoxybenzene **1g** (37.1 mg, 0.250 mmol, 2.5 equiv) were added to a 10 mL Schlenk tube, and the tube was evacuated and back-filled three times with argon. Then distilled THF (1.0 mL) was added by syringe, and the tube was evacuated and back-filled three times with argon again. The Schlenk tube was tightly capped. The reaction mixture was stirred at 60 °C for 12 h. After completion (monitored by TLC), the reaction was quenched by saturated sodium carbonate solution, and the mixture was stirred vigorously for 30 min, then extracted with EtOAc. The combined organic phases were evaporated under vacuo. The crude reaction mixture was purified by flash chromatography on silica gel (petroleum ether/EtOAc = 7:1) to give the product **7i**: 38.3 mg (0.0747 mmol), as a white solid, 75% yield; m.p. 104–106 °C; <sup>1</sup>H NMR (400 MHz, CDCl<sub>3</sub>): δ (ppm) 8.20 (d, *J* = 7.8 Hz, 1H), 7.65 (t, *J* = 7.6 Hz, 1H), 7.58 (d, *J* = 8.0 Hz, 1H), 7.51–7.39 (m, 3H), 7.25–7.17 (m, 3H), 7.07–6.89 (m, 2H), 6.89–6.68 (m, 2H), 6.11 (d, *J* = 15.6 Hz, 1H), 5.59 (s, 1H), 5.44–5.31 (m, 1H), 5.25–5.08 (m, 2H), 3.79 (s, 3H), 2.86–2.40 (m, 2H), 1.51–0.62 (brs, 9H); <sup>13</sup>C NMR (100 MHz, CDCl<sub>3</sub>): δ (ppm) 173.7, 163.7, 159.5, 136.9, 135.9, 133.9, 128.8, 128.4, 128.0, 127.6, 127.4, 125.1, 124.5, 117.3, 113.9, 81.0, 61.8, 55.3, 47.1, 44.0, 27.9; HRMS (ESI-TOF)  $m/z$ :  $[M + Na]^+$  Calcd for  $[C_{31}H_{32}N_2O_5 + Na]^+$  535.2203; Found 535.2198.

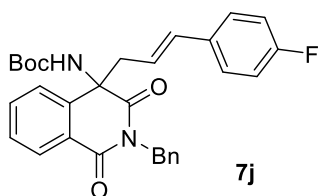

**Tert-butyl (E)-(2-benzyl-4-(3-(4-fluorophenyl)allyl)-1,3-dioxo-1,2,3,4-tetrahydroisoquinolin-4-yl)carbamate (7j):** *Tert*-butyl (2-benzyl-1,3-

dioxo-2,3-dihydroisoquinolin-4(1*H*)-ylidene)carbamate **6a** (36.4 mg, 0.0999 mmol), Pd(OAc)<sub>2</sub> (1.2 mg, 0.0053 mmol, 5 mol%), PPh<sub>3</sub> (5.2 mg,

0.020 mmol, 20 mol%), 2,6-DMBQ (20.4 mg, 0.150 mmol, 1.5 equiv) and 1-allyl-4-fluorobenzene **1h** (34.0 mg, 0.250 mmol, 2.5 equiv) were added to a 10 mL Schlenk tube, and the tube was evacuated and back-filled three times with argon. Then distilled THF (1.0 mL) was added by

syringe, and the tube was evacuated and back-filled three times with argon again. The Schlenk tube was tightly capped. The reaction mixture was stirred at 80 °C for 36 h. After completion (monitored by TLC), the reaction was quenched by saturated sodium carbonate solution, and the mixture was stirred vigorously for 30 min, then extracted with EtOAc. The combined organic phases were evaporated under vacuo. The crude reaction mixture was purified by flash chromatography on silica gel (petroleum ether/EtOAc = 8:1) to give the product **7j**: 45.6 mg (0.0911 mmol), as a white solid, 91% yield; m.p. 141–143 °C; <sup>1</sup>H NMR (400 MHz, CDCl<sub>3</sub>): δ (ppm) 8.21 (dd, *J* = 8.0 Hz, 0.8 Hz, 1H), 7.66 (t, *J* = 7.6 Hz, 1H), 7.60 (d, *J* = 8.0 Hz, 1H), 7.52–7.41 (m, 3H), 7.25–7.16 (m, 3H), 7.01–6.84 (m, 4H), 6.07 (d, *J* = 15.2 Hz, 1H), 5.73 (s, 1H), 5.50–5.30 (m, 1H), 5.33–5.02 (m, 2H), 2.94–2.43 (m, 2H), 1.61–0.57 (brs, 9H); <sup>13</sup>C NMR (100 MHz, CDCl<sub>3</sub>): δ (ppm) 173.6, 163.7, 162.5 (<sup>1</sup>*J*<sub>FC</sub> = 247.2 Hz), 136.9, 135.2, 134.0, 132.2 (<sup>4</sup>*J*<sub>FC</sub> = 3.3 Hz), 128.9, 128.4, 128.1, 128.0, 127.9, 127.5, 125.2, 124.5, 119.4 (<sup>4</sup>*J*<sub>FC</sub> = 2.2 Hz), 115.4 (<sup>2</sup>*J*<sub>FC</sub> = 21.6 Hz), 81.1, 61.8, 46.9, 44.0, 27.9; <sup>19</sup>F NMR (376 MHz, CDCl<sub>3</sub>): δ (ppm) –113.7; HRMS (ESI-TOF) *m/z*: [M + Na]<sup>+</sup> Calcd for [C<sub>30</sub>H<sub>29</sub>FN<sub>2</sub>O<sub>4</sub> + Na]<sup>+</sup> 523.2004; Found 523.2000.

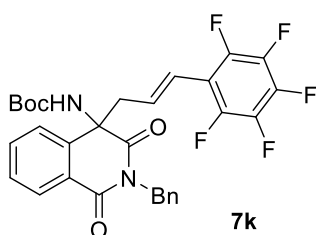

**7k**

**Tert-butyl (E)-(2-benzyl-1,3-dioxo-4-(3-(perfluorophenyl)allyl)-1,2,3,4-tetrahydroisoquinolin-4-yl)carbamate (7k):** *Tert*-butyl (2-benzyl-1,3-dioxo-2,3-dihydroisoquinolin-4(1*H*)-ylidene)carbamate **6a** (36.4 mg, 0.0999 mmol), Pd(OAc)<sub>2</sub> (1.2 mg, 0.0053 mmol, 5 mol%), PPh<sub>3</sub> (5.2 mg, 0.020 mmol, 20 mol%), 2,6-DMBQ (20.4 mg, 0.150

mmol, 1.5 equiv) and 1-allyl-2,3,4,5,6-pentafluorobenzene **1i** (52.0 mg, 0.250 mmol, 2.5 equiv) were added to a 10 mL Schlenk tube, and the tube was evacuated and back-filled three times with argon. Then distilled THF (1.0 mL) was added by syringe, and the tube was evacuated and back-filled three times with argon again. The Schlenk tube was tightly capped. The reaction mixture was stirred at 80 °C for 48 h. After completion (monitored by TLC), the reaction was quenched by saturated sodium carbonate solution, and the mixture was stirred vigorously for 30 min, then extracted with EtOAc. The combined organic phases were evaporated under vacuo. The crude reaction mixture was purified by flash chromatography on silica gel (petroleum ether/EtOAc = 8:1) to give the product **7k**: 50.0 mg (0.0873 mmol), as a white solid, 87% yield; m.p. 153–155 °C; <sup>1</sup>H NMR (400 MHz, CDCl<sub>3</sub>): δ (ppm) 8.25 (d, *J* = 7.6 Hz, 1H), 7.68 (t, *J* = 7.6 Hz, 1H), 7.60 (d, *J* = 7.6 Hz, 1H), 7.56–7.40 (m, 3H), 7.20–6.98 (m, 3H), 5.98 (d, *J* = 16.4 Hz, 1H), 5.82–5.69 (m, 1H), 5.72

(s, 1H), 5.30–4.95 (m, 2H), 3.05–2.45 (m, 2H), 1.54–0.58 (brs, 9H);  $^{13}\text{C}$  NMR (100 MHz,  $\text{CDCl}_3$ ):  $\delta$  (ppm) 173.5, 163.5, 144.4 ( $^1J_{\text{FC}} = 248.0$  Hz), 140.1 ( $^1J_{\text{FC}} = 242.5$  Hz), 136.7, 136.6–135.9 (m), 130.1–129.4 (m), 128.9, 128.3, 128.1, 127.3, 125.2, 124.5, 120.2, 111.5–109.6 (m), 81.3, 61.3, 47.7, 43.9, 27.9;  $^{19}\text{F}$  NMR (376 MHz,  $\text{CDCl}_3$ ):  $\delta$  (ppm) –142.7, –155.6, –162.7; HRMS (ESI-TOF)  $m/z$ :  $[\text{M} + \text{Na}]^+$  Calcd for  $[\text{C}_{30}\text{H}_{25}\text{F}_5\text{N}_2\text{O}_4 + \text{Na}]^+$  595.1627; Found 595.1622.

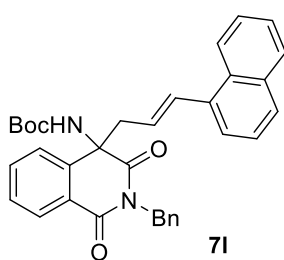

**Tert-butyl (E)-(2-benzyl-4-(3-(naphthalen-1-yl)allyl)-1,3-dioxo-1,2,3,4-tetrahydroisoquinolin-4-yl)carbamate (7l):** *Tert*-butyl (2-benzyl-1,3-dioxo-2,3-dihydroisoquinolin-4(1*H*)-ylidene)carbamate **6a** (36.4 mg, 0.0999 mmol),  $\text{Pd}(\text{OAc})_2$  (1.2 mg, 0.0053 mmol, 5 mol%),  $\text{PPh}_3$  (5.2 mg, 0.020 mmol, 20 mol%), 2,6-DMBQ (20.4 mg, 0.150 mmol, 1.5 equiv) and

1-allylnaphthalene **1j** (42.1 mg, 0.250 mmol, 2.5 equiv) were added to a 10 mL Schlenk tube, and the tube was evacuated and back-filled three times with argon. Then distilled THF (1.0 mL) was added by syringe, and the tube was evacuated and back-filled three times with argon again. The Schlenk tube was tightly capped. The reaction mixture was stirred at 60 °C for 12 h. After completion (monitored by TLC), the reaction was quenched by saturated sodium carbonate solution, and the mixture was stirred vigorously for 30 min, then extracted with EtOAc. The combined organic phases were evaporated under vacuo. The crude reaction mixture was purified by flash chromatography on silica gel (petroleum ether/EtOAc = 8:1) to give the product **7l**: 49.4 mg (0.0927 mmol), as a yellow solid, 93% yield; m.p. 197–199 °C;  $^1\text{H}$  NMR (400 MHz,  $\text{CDCl}_3$ ):  $\delta$  (ppm) 8.23 (d,  $J = 8.0$  Hz, 1H), 7.80 (d,  $J = 7.6$  Hz, 1H), 7.77–7.60 (m, 4H), 7.52–7.39 (m, 5H), 7.34 (t,  $J = 7.6$  Hz, 1H), 7.20–6.99 (m, 4H), 6.85 (d,  $J = 15.2$  Hz, 1H), 5.68 (s, 1H), 5.61–5.44 (m, 1H), 5.29–5.07 (m, 2H), 3.05–2.63 (m, 2H), 1.51–0.62 (brs, 9H);  $^{13}\text{C}$  NMR (100 MHz,  $\text{CDCl}_3$ ):  $\delta$  (ppm) 173.7, 163.7, 136.7, 134.1, 134.0, 133.7, 133.4, 130.8, 128.9, 128.5, 128.3, 128.1, 127.4, 126.0, 125.8, 125.6, 125.3, 124.6, 124.1, 123.5, 122.8, 81.1, 61.8, 47.3, 44.0, 27.9; HRMS (ESI-TOF)  $m/z$ :  $[\text{M} + \text{Na}]^+$  Calcd for  $[\text{C}_{34}\text{H}_{32}\text{N}_2\text{O}_4 + \text{Na}]^+$  555.2254; Found 555.2254.

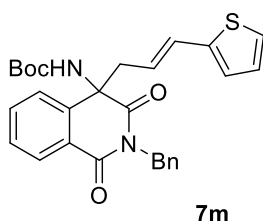

**Tert-butyl (E)-(2-benzyl-1,3-dioxo-4-(3-(thiophen-2-yl)allyl)-1,2,3,4-tetrahydroisoquinolin-4-yl)carbamate (7m):** *Tert*-butyl (2-benzyl-1,3-dioxo-2,3-dihydroisoquinolin-4(1*H*)-ylidene)carbamate **6a** (36.4 mg, 0.0999 mmol),  $\text{Pd}(\text{OAc})_2$  (1.2 mg, 0.0053 mmol, 5 mol%),  $\text{PPh}_3$  (5.2 mg, 0.020

mmol, 20 mol%), 2,6-DMBQ (20.4 mg, 0.150 mmol, 1.5 equiv) and 2-allylthiophene **1k** (31.1 mg, 0.250 mmol, 2.5 equiv) were added to a 10 mL Schlenk tube, and the tube was evacuated and back-filled three times with argon. Then distilled THF (1.0 mL) was added by syringe, and the tube was evacuated and back-filled three times with argon again. The Schlenk tube was tightly capped. The reaction mixture was stirred at 60 °C for 12 h. After completion (monitored by TLC), the reaction was quenched by saturated sodium carbonate solution, and the mixture was stirred vigorously for 30 min, then extracted with EtOAc. The combined organic phases were evaporated under vacuo. The crude reaction mixture was purified by flash chromatography on silica gel (petroleum ether/EtOAc = 8:1) to give the product **7m**: 41.5 mg (0.0849 mmol), as a white solid, 85% yield; m.p. 142–144 °C; <sup>1</sup>H NMR (400 MHz, CDCl<sub>3</sub>): δ (ppm) 8.22 (d, *J* = 7.6 Hz, 1H), 7.65 (t, *J* = 7.6 Hz, 1H), 7.57 (d, *J* = 8.0 Hz, 1H), 7.52–7.42 (m, 3H), 7.26–7.15 (m, 3H), 7.12 (d, *J* = 4.8 Hz, 1H), 6.90 (t, *J* = 3.6 Hz, 1H), 6.74 (d, *J* = 3.6 Hz, 1H), 6.30 (d, *J* = 15.2 Hz, 1H), 5.62 (s, 1H), 5.46–5.30 (m, 1H), 5.29–5.07 (m, 2H), 2.92–2.23 (m, 2H), 1.54–0.66 (brs, 9H); <sup>13</sup>C NMR (100 MHz, CDCl<sub>3</sub>): δ (ppm) 173.6, 163.6, 140.9, 136.8, 134.0, 129.3, 129.0, 128.4, 128.1, 127.4, 127.3, 126.1, 125.1, 124.8, 124.5, 119.2, 81.1, 61.7, 46.7, 44.0, 27.9; HRMS (ESI-TOF) *m/z*: [M + Na]<sup>+</sup> Calcd for [C<sub>28</sub>H<sub>28</sub>N<sub>2</sub>O<sub>4</sub>S + Na]<sup>+</sup> 511.1662; Found 511.1664.

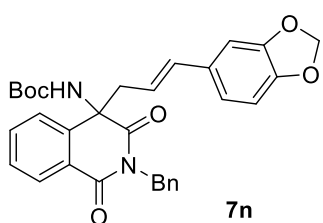

**7n**

**Tert-butyl (E)-(4-(3-(benzo[*d*][1,3]dioxol-5-yl)allyl)-2-benzyl-1,3-dioxo-1,2,3,4-tetrahydroisoquinolin-4-yl)carbamate (7n):** *Tert*-butyl (2-benzyl-1,3-dioxo-2,3-dihydroisoquinolin-4(*1H*)-ylidene) carbamate

**6a** (36.4 mg, 0.0999 mmol), Pd(OAc)<sub>2</sub> (1.2 mg, 0.0053 mmol, 5 mol%), PPh<sub>3</sub> (5.2 mg, 0.020 mmol, 20 mol%), 2,6-DMBQ (20.4 mg, 0.150 mmol, 1.5 equiv) and 5-allylbenzo[*d*][1,3]dioxole **1l** (40.5 mg, 0.250 mmol, 2.5 equiv) were added to a 10 mL Schlenk tube, and the tube was evacuated and back-filled three times with argon. Then distilled THF (1.0 mL) was added by syringe, and the tube was evacuated and back-filled three times with argon again. The Schlenk tube was tightly capped. The reaction mixture was stirred at 60 °C for 12 h. After completion (monitored by TLC), the reaction was quenched by saturated sodium carbonate solution, and the mixture was stirred vigorously for 30 min, then extracted with EtOAc. The combined organic phases were evaporated under vacuo. The crude reaction mixture was purified by flash chromatography on silica gel (petroleum ether/EtOAc = 8:1) to give the product **7n**: 34.6 mg (0.0657 mmol), as a yellow solid, 66% yield; m.p. 91–93 °C; <sup>1</sup>H NMR (400 MHz, CDCl<sub>3</sub>): δ (ppm)

8.20 (d,  $J = 7.6$  Hz, 1H), 7.65 (t,  $J = 7.2$  Hz, 1H), 7.57 (d,  $J = 8.0$  Hz, 1H), 7.51–7.41 (m, 3H), 7.30–7.13 (m, 3H), 6.67 (d,  $J = 8.0$  Hz, 1H), 6.53 (s, 1H), 6.48 (d,  $J = 8.0$  Hz, 1H), 6.03 (d,  $J = 15.6$  Hz, 1H), 5.93 (s, 2H), 5.54 (d,  $J = 8.4$  Hz, 1H), 5.40–5.22 (m, 1H), 5.24–5.01 (m, 2H), 2.75–2.44 (m, 2H), 1.52–0.70 (brs, 9H);  $^{13}\text{C}$  NMR (100 MHz,  $\text{CDCl}_3$ ):  $\delta$  (ppm) 173.6, 163.7, 148.0, 147.6, 136.9, 136.0, 134.0, 130.5, 128.9, 128.4, 128.0, 127.5, 125.2, 124.4, 121.3, 117.6, 108.2, 105.6, 101.1, 81.1, 61.8, 47.0, 44.0, 28.0; HRMS (ESI-TOF)  $m/z$ :  $[\text{M} + \text{Na}]^+$  Calcd for  $[\text{C}_{31}\text{H}_{30}\text{N}_2\text{O}_6 + \text{Na}]^+$  549.1996; Found 549.1994.

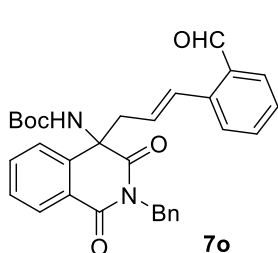

**Tert-butyl (E)-(2-benzyl-4-(3-(2-formylphenyl)allyl)-1,3-dioxo-1,2,3,4-tetrahydroisoquinolin-4-yl)carbamate (7o):** *Tert*-butyl (2-benzyl-1,3-dioxo-2,3-dihydroisoquinolin-4(1*H*)-ylidene)carbamate **6a** (36.4 mg, 0.0999 mmol),  $\text{Pd}(\text{OAc})_2$  (1.2 mg, 0.0053 mmol, 5 mol%),  $\text{PPh}_3$  (5.2 mg, 0.020 mmol, 20 mol%), 2,6-DMBQ (20.4 mg, 0.150 mmol, 1.5 equiv) and

2-allylbenzaldehyde **1m** (36.5 mg, 0.250 mmol, 2.5 equiv) were added to a 10 mL Schlenk tube, and the tube was evacuated and back-filled three times with argon. Then distilled THF (1.0 mL) was added by syringe, and the tube was evacuated and back-filled three times with argon again. The Schlenk tube was tightly capped. The reaction mixture was stirred at 80 °C for 24 h. After completion (monitored by TLC), the reaction was quenched by saturated sodium carbonate solution, and the mixture was stirred vigorously for 30 min, then extracted with EtOAc. The combined organic phases were evaporated under vacuo. The crude reaction mixture was purified by flash chromatography on silica gel (petroleum ether/EtOAc = 6:1) to give the product **7o**: 49.2 mg (0.0964 mmol), as a white solid, 96% yield; m.p. 115–117 °C;  $^1\text{H}$  NMR (400 MHz,  $\text{CDCl}_3$ ):  $\delta$  (ppm) 9.99 (s, 1H), 8.22 (d,  $J = 8.0$  Hz, 1H), 7.72 (dd,  $J = 7.2$  Hz, 0.8 Hz, 1H), 7.70–7.59 (m, 2H), 7.54–7.35 (m, 5H), 7.22–7.09 (m, 3H), 7.06–6.91 (m, 2H), 5.73 (s, 1H), 5.55–5.34 (m, 1H), 5.30–5.07 (m, 2H), 3.01–2.41 (m, 2H), 1.57–0.64 (brs, 9H);  $^{13}\text{C}$  NMR (100 MHz,  $\text{CDCl}_3$ ):  $\delta$  (ppm) 192.4, 173.4, 163.7, 138.4, 136.8, 134.2, 133.8, 133.4, 132.6, 132.3, 128.9, 128.3, 128.11, 128.05, 127.6, 127.5, 125.1, 124.8, 124.4, 81.1, 61.6, 47.0, 43.9, 27.9; HRMS (ESI-TOF)  $m/z$ :  $[\text{M} + \text{Na}]^+$  Calcd for  $[\text{C}_{31}\text{H}_{30}\text{N}_2\text{O}_5 + \text{Na}]^+$  533.2047; Found 533.2040.

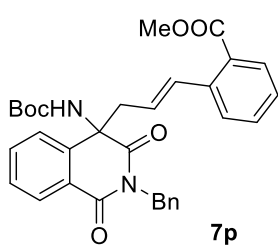

**Methyl (E)-2-(3-(2-benzyl-4-((tert-butoxycarbonyl)amino)-1,3-dioxo-1,2,3,4-tetrahydroisoquinolin-4-yl)prop-1-en-1-yl)benzoate (7p):**

*Tert*-butyl (2-benzyl-1,3-dioxo-2,3-dihydroisoquinolin-4(1*H*)-ylidene) carbamate **6a** (36.4 mg, 0.0999 mmol), Pd(OAc)<sub>2</sub> (1.2 mg, 0.0053 mmol, 5 mol%), PPh<sub>3</sub> (5.2 mg, 0.020 mmol, 20 mol%), 2,6-DMBQ (20.4 mg, 0.150

mmol, 1.5 equiv) and methyl 2-allylbenzoate **1n** (44.1 mg, 0.250 mmol, 2.5 equiv) were added to a 10 mL Schlenk tube, and the tube was evacuated and back-filled three times with argon. Then distilled THF (1.0 mL) was added by syringe, and the tube was evacuated and back-filled three times with argon again. The Schlenk tube was tightly capped. The reaction mixture was stirred at 80 °C for 60 h. After completion (monitored by TLC), the reaction was quenched by saturated sodium carbonate solution, and the mixture was stirred vigorously for 30 min, then extracted with EtOAc. The combined organic phases were evaporated under vacuo. The crude reaction mixture was purified by flash chromatography on silica gel (petroleum ether/EtOAc = 5:1) to give the product **7p**: 52.8 mg (0.0977 mmol), as a white solid, 98% yield; m.p. 59–61 °C; <sup>1</sup>H NMR (400 MHz, CDCl<sub>3</sub>): δ (ppm) 8.22 (d, *J* = 8.0 Hz, 1H), 7.87 (d, *J* = 7.6 Hz, 1H), 7.70–7.56 (m, 2H), 7.55–7.42 (m, 3H), 7.39 (t, *J* = 7.6 Hz, 1H), 7.29 (t, *J* = 7.6 Hz, 1H), 7.24–7.11 (m, 3H), 7.05 (d, *J* = 7.6 Hz, 1H), 7.01 (d, *J* = 16.4 Hz, 1H), 5.79 (s, 1H), 5.36 (s, 1H), 5.31–5.07 (m, 2H), 3.88 (s, 3H), 2.91–2.44 (m, 2H), 1.56–0.62 (brs, 9H); <sup>13</sup>C NMR (100 MHz, CDCl<sub>3</sub>): δ (ppm) 173.5, 167.4, 163.8, 138.5, 136.9, 136.1, 134.0, 132.4, 130.4, 129.0, 128.3, 128.1, 128.0, 127.8, 127.6, 127.5, 124.9, 124.5, 122.6, 80.9, 61.7, 52.1, 46.9, 44.0, 28.1; HRMS (ESI-TOF) *m/z*: [M + Na]<sup>+</sup> Calcd for [C<sub>32</sub>H<sub>32</sub>N<sub>2</sub>O<sub>6</sub> + Na]<sup>+</sup> 563.2153; Found 563.2151.

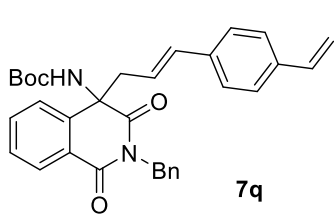

***Tert*-butyl (E)-(2-benzyl-1,3-dioxo-4-(3-(4-vinylphenyl)allyl)-1,2,3,4-tetrahydroisoquinolin-4-yl)carbamate (7q):**

*Tert*-butyl (2-benzyl-1,3-dioxo-2,3-dihydroisoquinolin-4(1*H*)-ylidene)carbamate **6a** (36.4 mg, 0.0999 mmol), Pd(OAc)<sub>2</sub> (1.2 mg, 0.0053 mmol, 5 mol%), PPh<sub>3</sub> (5.2

mg, 0.020 mmol, 20 mol%), 2,6-DMBQ (20.4 mg, 0.150 mmol, 1.5 equiv) and 1-allyl-4-vinylbenzene **1o** (36.1 mg, 0.250 mmol, 2.5 equiv) were added to a 10 mL Schlenk tube, and the tube was evacuated and back-filled three times with argon. Then distilled THF (1.0 mL) was added by syringe, and the tube was evacuated and back-filled three times with argon again. The Schlenk tube was tightly capped. The reaction mixture was stirred at 80 °C for 48 h. After

completion (monitored by TLC), the reaction was quenched by saturated sodium carbonate solution, and the mixture was stirred vigorously for 30 min, then extracted with EtOAc. The combined organic phases were evaporated under vacuo. The crude reaction mixture was purified by flash chromatography on silica gel (petroleum ether/EtOAc = 7:1) to give the product **7q**: 39.3 mg (0.0773 mmol), as a white solid, 77% yield; m.p. 70–72 °C; <sup>1</sup>H NMR (400 MHz, CDCl<sub>3</sub>): δ (ppm) 8.21 (d, *J* = 7.6 Hz, 1H), 7.65 (t, *J* = 7.6 Hz, 1H), 7.58 (d, *J* = 8.0 Hz, 1H), 7.53–7.40 (m, 3H), 7.34–7.16 (m, 5H), 6.99 (d, *J* = 8.0 Hz, 2H), 6.67 (dd, *J* = 17.6 Hz, 10.8 Hz, 1H), 6.14 (d, *J* = 16.0 Hz, 1H), 5.73 (d, *J* = 17.6 Hz, 1H), 5.56 (s, 1H), 5.55–5.43 (m, 1H), 5.28–5.19 (m, 2H), 5.14 (d, *J* = 13.6 Hz, 1H), 3.01–2.51 (m, 2H), 1.54–0.74 (brs, 9H); <sup>13</sup>C NMR (100 MHz, CDCl<sub>3</sub>): δ (ppm) 173.6, 163.7, 137.3, 136.9, 136.3, 136.1, 135.5, 134.0, 128.9, 128.4, 128.0, 127.5, 126.6, 126.4, 125.2, 124.5, 119.6, 114.1, 81.1, 61.8, 47.1, 44.0, 27.9; HRMS (ESI-TOF) *m/z*: [M + Na]<sup>+</sup> Calcd for [C<sub>32</sub>H<sub>32</sub>N<sub>2</sub>O<sub>4</sub> + Na]<sup>+</sup> 531.2254; Found 531.2256.

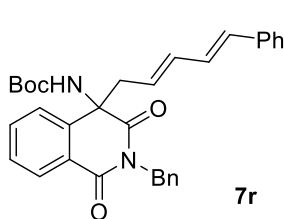

**Tert-butyl (2-benzyl-1,3-dioxo-4-((2*E*,4*E*)-5-phenylpenta-2,4-dien-1-yl)-1,2,3,4-tetrahydroisoquinolin-4-yl)carbamate (7r):** *Tert*-butyl

(2-benzyl-1,3-dioxo-2,3-dihydroisoquinolin-4(1*H*)-ylidene)carbamate **6a** (36.4 mg, 0.0999 mmol), Pd(OAc)<sub>2</sub> (1.2 mg, 0.0053 mmol, 5 mol%), PPh<sub>3</sub>

(5.2 mg, 0.020 mmol, 20 mol%), 2,6-DMBQ (20.4 mg, 0.150 mmol, 1.5 equiv) and penta-1,4-dien-1-ylbenzene **1p** (36.1 mg, 0.250 mmol, 2.5 equiv) were added to a 10 mL Schlenk tube, and the tube was evacuated and back-filled three times with argon. Then distilled THF (1.0 mL) was added by syringe, and the tube was evacuated and back-filled three times with argon again. The Schlenk tube was tightly capped. The reaction mixture was stirred at 80 °C for 60 h. After completion (monitored by TLC), the reaction was quenched by saturated sodium carbonate solution, and the mixture was stirred vigorously for 30 min, then extracted with EtOAc. The combined organic phases were evaporated under vacuo. The crude reaction mixture was purified by flash chromatography on silica gel (petroleum ether/EtOAc = 7:1) to give the product **7r**: 43.7 mg (0.0859 mmol), as a white solid, 86% yield; m.p. 75–78 °C; <sup>1</sup>H NMR (400 MHz, CDCl<sub>3</sub>): δ (ppm) 8.22 (d, *J* = 7.6 Hz, 1H), 7.65 (t, *J* = 7.6 Hz, 1H), 7.57 (d, *J* = 7.6 Hz, 1H), 7.54–7.40 (m, 3H), 7.38–7.02 (m, 8H), 6.46 (dd, *J* = 15.6 Hz, 10.4 Hz, 1H), 6.34 (d, *J* = 15.6 Hz, 1H), 6.13–5.88 (m, 1H), 5.74–5.49 (m, 1H), 5.36–5.00 (m, 3H), 2.85–2.42 (m, 2H), 1.52–0.62 (brs, 9H); <sup>13</sup>C NMR (100 MHz, CDCl<sub>3</sub>): δ (ppm) 173.6, 163.8, 136.9, 136.84, 136.78, 134.0, 133.4, 128.9, 128.7, 128.4,

128.0, 127.9, 127.5, 126.5, 125.1, 124.5, 123.3, 81.1, 61.7, 47.0, 44.0, 27.8; HRMS (ESI-TOF)  $m/z$ :  $[M + Na]^+$  Calcd for  $[C_{32}H_{32}N_2O_4 + Na]^+$  531.2254; Found 531.2257.

#### 4.4 Oxidative nucleophilic allylation of isoquinoline-1,3,4-trione-derived ketimine **6a** on a 1.0 mmol scale

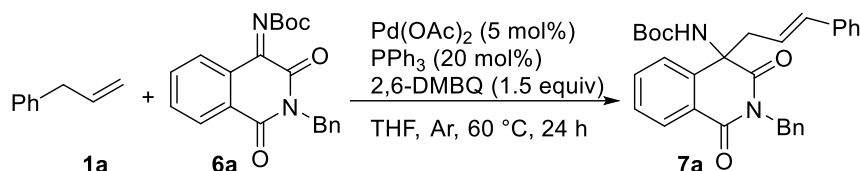

A mixture of *tert*-butyl (2-benzyl-1,3-dioxo-2,3-dihydroisoquinolin-4(1*H*)-ylidene)carbamate **6a** (364.4 mg, 1.000 mmol, 1.0 equiv),  $Pd(OAc)_2$  (11.2 mg, 0.0499 mmol, 5 mol%),  $PPh_3$  (52.5 mg, 0.200 mmol, 20 mol%), 2,6-DMBQ (204.2 mg, 1.500 mmol, 1.5 equiv) and allylbenzene **1a** (295.4 mg, 2.500 mmol, 2.5 equiv) were added to a 25 mL Schlenk tube, and the tube was evacuated and back-filled three times with argon. Then distilled THF (10 mL) was added by syringe, and the tube was evacuated and back-filled three times with argon again. The Schlenk tube was tightly capped. The reaction mixture was stirred at 60 °C for 24 h. After completion (monitored by TLC), the reaction was quenched by saturated sodium carbonate solution, and the mixture was stirred vigorously for 30 min, then extracted with EtOAc. The combined organic phases were evaporated under vacuo. The crude reaction mixture was purified by flash chromatography on silica gel (petroleum ether/EtOAc = 15:1) to give the product **7a**: 464.2 mg (0.9619 mmol), as a white solid, 96% yield.

## 5. Screening conditions of asymmetric oxidative nucleophilic allylation

### 5.1 Screening conditions of asymmetric oxidative nucleophilic allylation of allylbenzene **1a** and isatin-derived ketimine **2a**

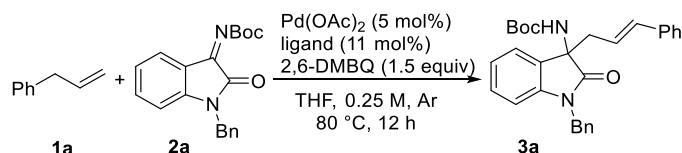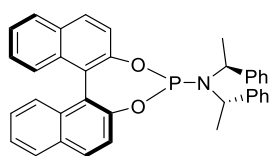

62% yield, 4% ee

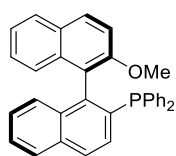

NR

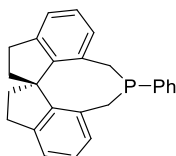

ca. 50% yield, 1% ee

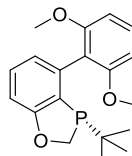

43% yield, 1% ee

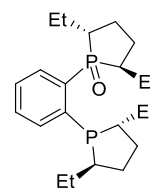

22% yield, 3% ee



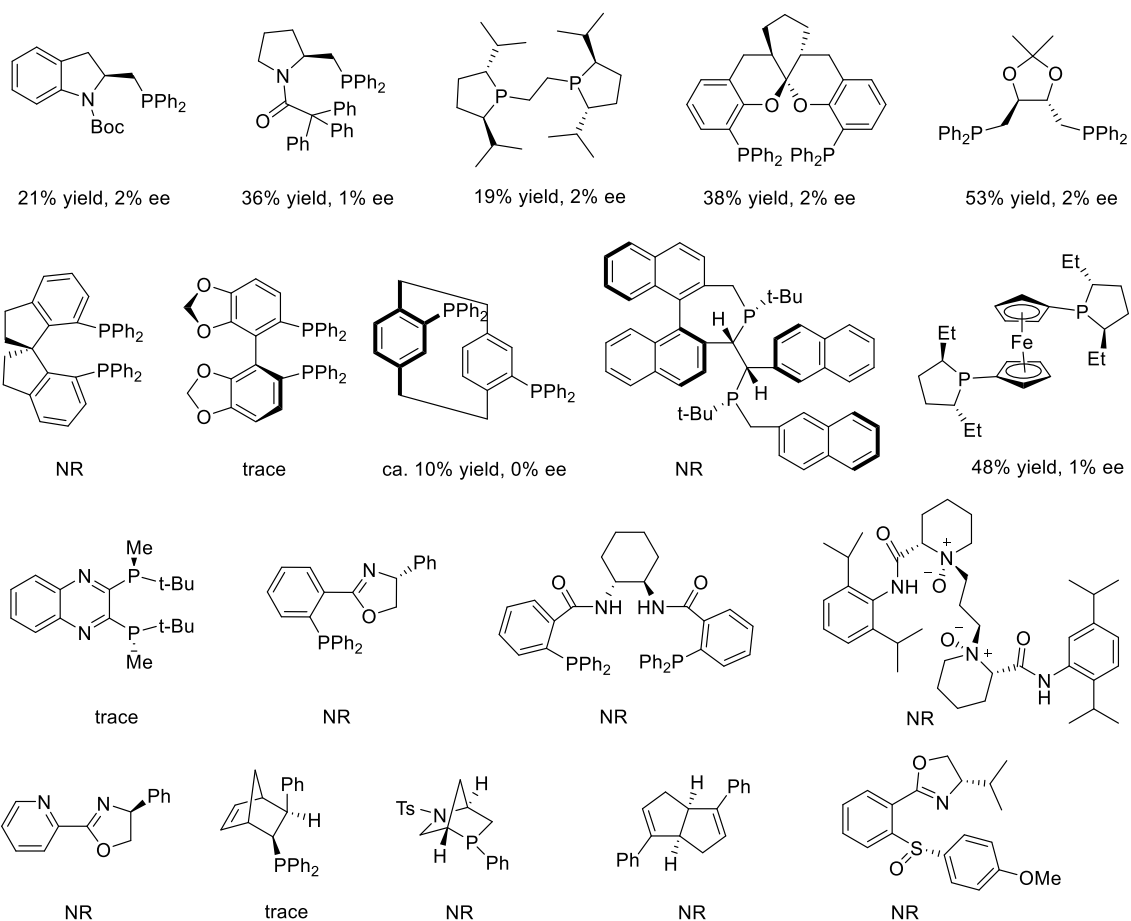

## 5.2 Screening conditions of asymmetric oxidative nucleophilic allylation of allylbenzene **1a** and isoquinoline-1,3,4-trione-derived ketimine **6a**

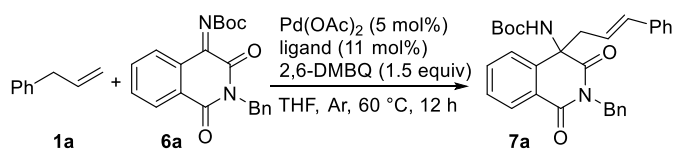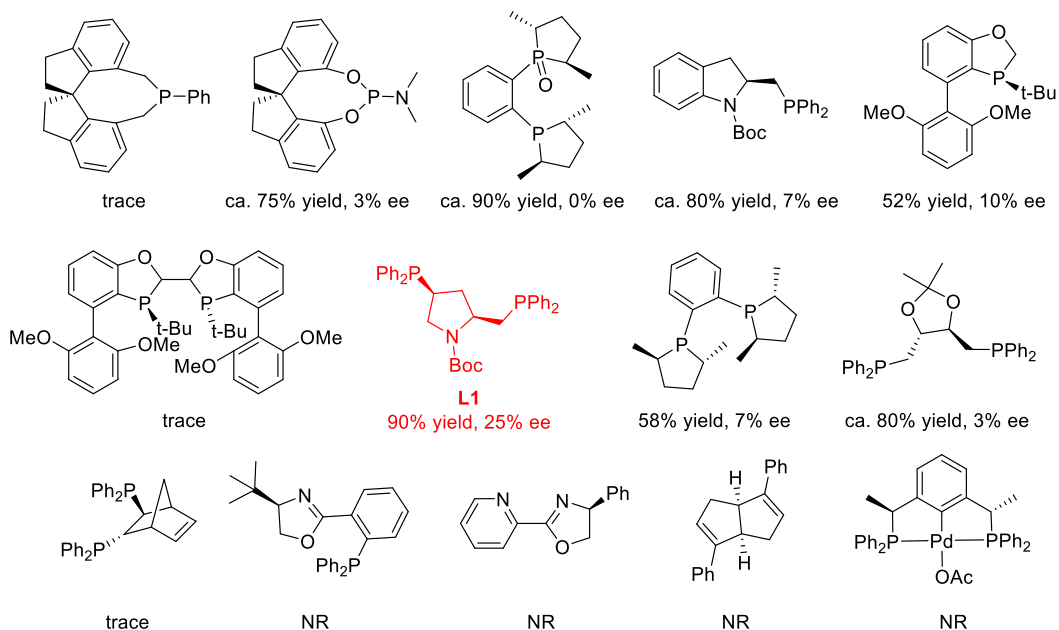

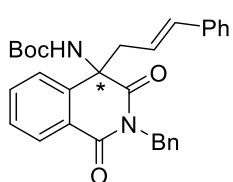

**Synthesis of chiral 7a:** *Tert*-butyl (2-benzyl-1,3-dioxo-2,3-dihydroisoquinolin-4(1*H*)-ylidene)carbamate **6a** (18.2 mg, 0.0499 mmol), Pd(OAc)<sub>2</sub> (0.6 mg, 0.0027 mmol, 5 mol%), **L1** (3.0 mg, 0.0054 mmol, 11 mol%), 2,6-DMBQ (10.2 mg, 0.0749 mmol, 1.5 equiv) and allylbenzene **1a**

(14.8 mg, 0.125 mmol, 2.5 equiv) were added to a 10 mL Schlenk tube, and the tube was evacuated and back-filled three times with argon. Then distilled THF (0.5 mL) was added by syringe, and the tube was evacuated and back-filled three times with argon again. The Schlenk tube was tightly capped. The reaction mixture was stirred at 60 °C for 12 h. After completion (monitored by TLC), the reaction was quenched by saturated sodium carbonate solution, and the mixture was stirred vigorously for 30 min, then extracted with EtOAc. The combined organic phases were evaporated under vacuo. The crude reaction mixture was purified by flash chromatography on silica gel (petroleum ether/EtOAc = 8:1) to give the product chiral **7a**: 21.7 mg (0.0450 mmol), as a white solid, 90% yield; 25% ee, determined by HPLC analysis [Daicel Chiralpak IE, *n*-hexane/*i*-PrOH = 60:40, 1.0 mL min<sup>-1</sup>, λ = 254 nm]: t (minor) = 6.22 min, t (major) = 16.28 min.

## 7. Crystal data and structural refinement for racemic **7a** and **7j**

**Procedure for the recrystallisation of 7a:** To a 10 mL tube containing **7a** (80 mg) were added MeOH (4.0 mL) and CHCl<sub>3</sub> (0.5 mL). The mixture was heated until a clear solution was formed, which was kept aside at room temperature to obtain crystals. The crystals were subjected for single crystal XRD to determine the absolute configuration of **7a**. The data were collected by an Agilent Gemini equipped with a Cu radiation source (Kα = 1.54184 Å) at 296.1(5) K. CCDC 2057382 (**7a**) contains the supplementary crystallographic data for this paper. These data can be obtained free of charge via [www.ccdc.cam.ac.uk/data\\_request/cif](http://www.ccdc.cam.ac.uk/data_request/cif).

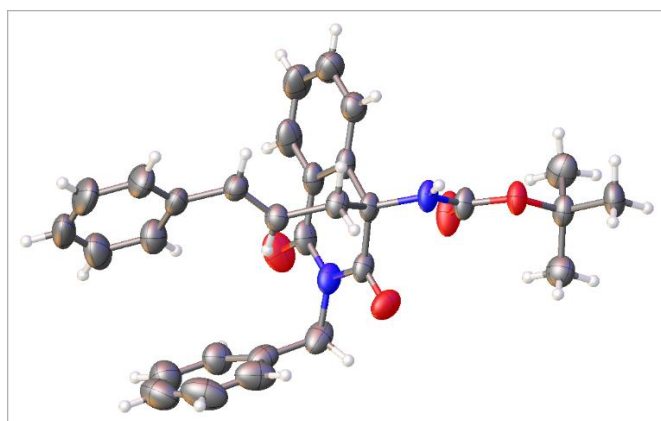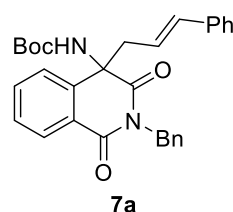

(ellipsoid contour probability 50%)

|                                             |                                                               |
|---------------------------------------------|---------------------------------------------------------------|
| Identification code                         | <b>7a</b>                                                     |
| Empirical formula                           | C <sub>30</sub> H <sub>30</sub> N <sub>2</sub> O <sub>4</sub> |
| Formula weight                              | 482.56                                                        |
| Temperature/K                               | 296.1(5)                                                      |
| Crystal system                              | monoclinic                                                    |
| Space group                                 | I2/a                                                          |
| a/Å                                         | 16.9036(4)                                                    |
| b/Å                                         | 10.5122(3)                                                    |
| c/Å                                         | 29.9577(7)                                                    |
| α/°                                         | 90                                                            |
| β/°                                         | 101.225(2)                                                    |
| γ/°                                         | 90                                                            |
| Volume/Å <sup>3</sup>                       | 5221.4(2)                                                     |
| Z                                           | 8                                                             |
| ρ <sub>calc</sub> /cm <sup>3</sup>          | 1.228                                                         |
| μ/mm <sup>-1</sup>                          | 0.656                                                         |
| F(000)                                      | 2048.0                                                        |
| Crystal size/mm <sup>3</sup>                | 0.3 × 0.2 × 0.2                                               |
| Radiation                                   | CuKα (λ = 1.54184)                                            |
| 2θ range for data collection/°              | 8.934 to 142.668                                              |
| Index ranges                                | -20 ≤ h ≤ 20, -12 ≤ k ≤ 12, -36 ≤ l ≤ 28                      |
| Reflections collected                       | 14234                                                         |
| Independent reflections                     | 5001 [R <sub>int</sub> = 0.0429, R <sub>sigma</sub> = 0.0313] |
| Data/restraints/parameters                  | 5001/0/328                                                    |
| Goodness-of-fit on F <sup>2</sup>           | 1.055                                                         |
| Final R indexes [I ≥ 2σ (I)]                | R <sub>1</sub> = 0.0634, wR <sub>2</sub> = 0.1833             |
| Final R indexes [all data]                  | R <sub>1</sub> = 0.0716, wR <sub>2</sub> = 0.1973             |
| Largest diff. peak/hole / e Å <sup>-3</sup> | 0.27/-0.24                                                    |

**Procedure for the recrystallisation of 7j:** To a 10 mL tube containing **7j** (52 mg) were added *n*-hexane (4.0 mL) and *i*-PrOH (0.5 mL). The mixture was heated until a clear solution was formed, which was kept aside at room temperature to obtain crystals. The crystals were subjected for single crystal XRD to determine the absolute configuration of **7j**. The data were collected by an Agilent Gemini equipped with a Cu radiation source (Kα = 1.54184 Å) at 295.2(6) K. CCDC 2057383 (**7j**) contains the supplementary crystallographic data for this paper. These data can be obtained free of charge via [www.ccdc.cam.ac.uk/data\\_request/cif](http://www.ccdc.cam.ac.uk/data_request/cif).

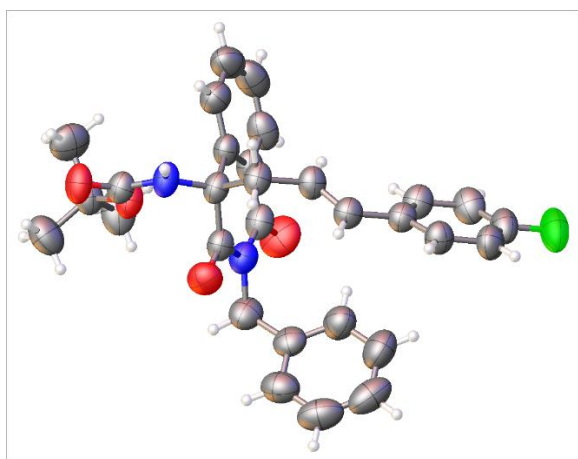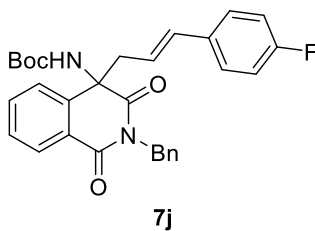

(ellipsoid contour probability 50%)

|                                                |                                                               |
|------------------------------------------------|---------------------------------------------------------------|
| Identification code                            | <b>7j</b>                                                     |
| Empirical formula                              | $C_{30}H_{29}FN_2O_4$                                         |
| Formula weight                                 | 500.55                                                        |
| Temperature/K                                  | 295.2(6)                                                      |
| Crystal system                                 | triclinic                                                     |
| Space group                                    | P-1                                                           |
| a/Å                                            | 10.1910(8)                                                    |
| b/Å                                            | 10.8141(7)                                                    |
| c/Å                                            | 12.7446(8)                                                    |
| $\alpha/^\circ$                                | 102.470(6)                                                    |
| $\beta/^\circ$                                 | 92.057(6)                                                     |
| $\gamma/^\circ$                                | 102.338(6)                                                    |
| Volume/Å <sup>3</sup>                          | 1334.77(17)                                                   |
| Z                                              | 2                                                             |
| $\rho_{\text{calc}}/\text{cm}^3$               | 1.245                                                         |
| $\mu/\text{mm}^{-1}$                           | 0.716                                                         |
| F(000)                                         | 528.0                                                         |
| Crystal size/mm <sup>3</sup>                   | 0.5 × 0.3 × 0.05                                              |
| Radiation                                      | CuK $\alpha$ ( $\lambda = 1.54184$ )                          |
| 2 $\theta$ range for data collection/ $^\circ$ | 7.13 to 171.374                                               |
| Index ranges                                   | $-12 \leq h \leq 11, -13 \leq k \leq 11, -15 \leq l \leq 14$  |
| Reflections collected                          | 13682                                                         |
| Independent reflections                        | 5224 [ $R_{\text{int}} = 0.0537, R_{\text{sigma}} = 0.0491$ ] |
| Data/restraints/parameters                     | 5224/0/337                                                    |
| Goodness-of-fit on $F^2$                       | 1.051                                                         |
| Final R indexes [ $I \geq 2\sigma(I)$ ]        | $R_1 = 0.0633, wR_2 = 0.1687$                                 |
| Final R indexes [all data]                     | $R_1 = 0.0948, wR_2 = 0.2071$                                 |
| Largest diff. peak/hole / e Å <sup>-3</sup>    | 0.21/−0.28                                                    |

## 8. NMR, HRMS spectra and HPLC chromatograms

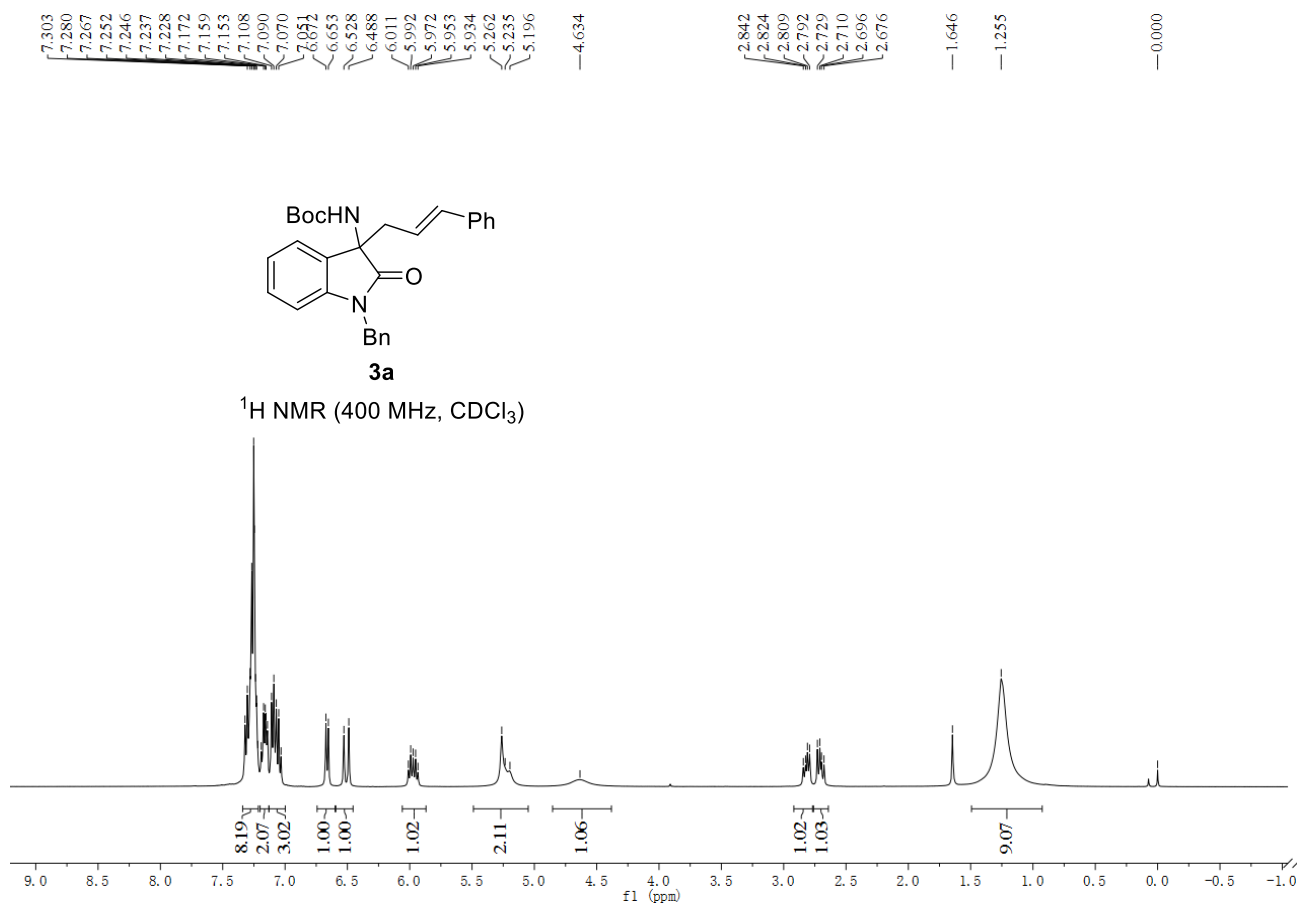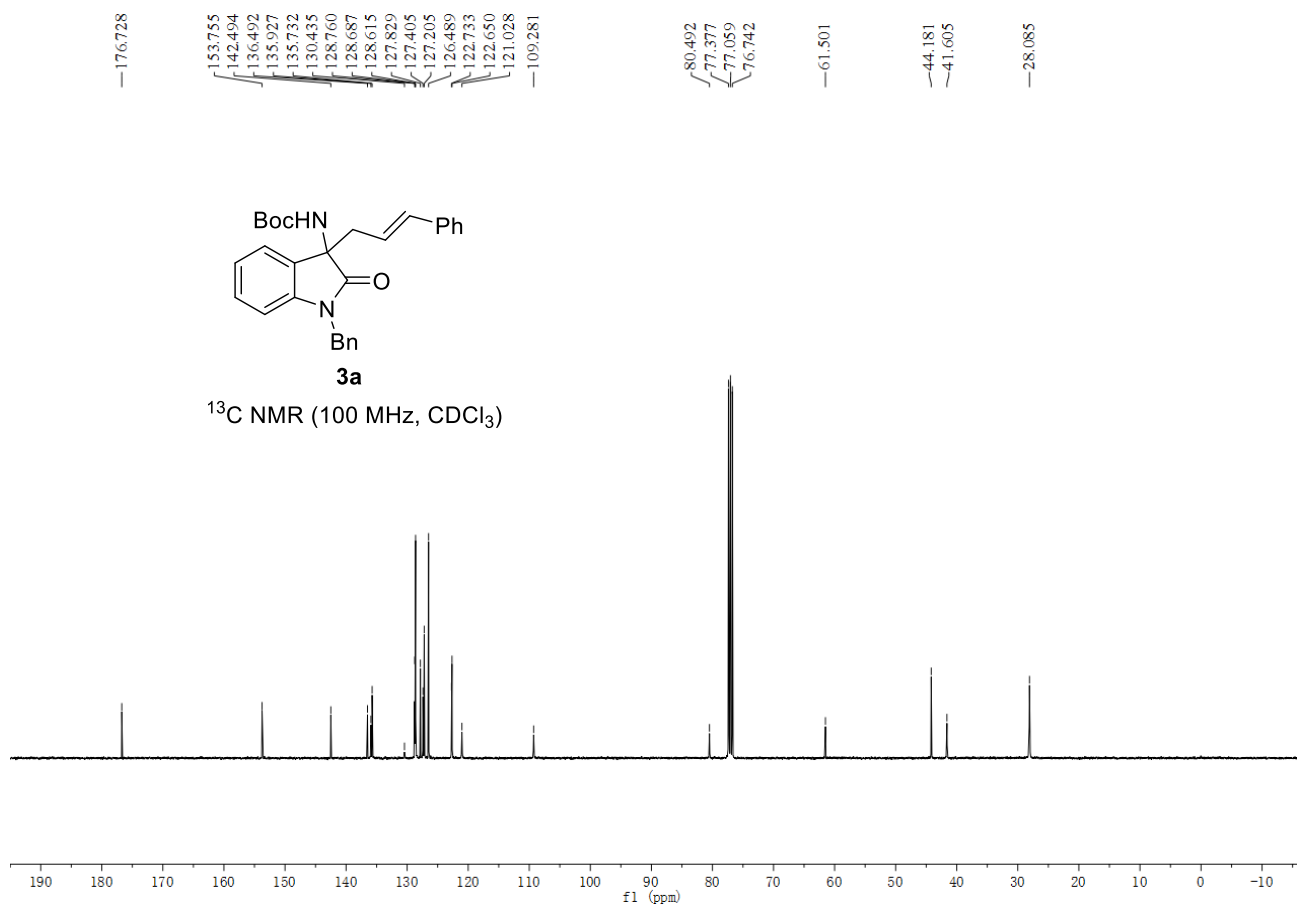

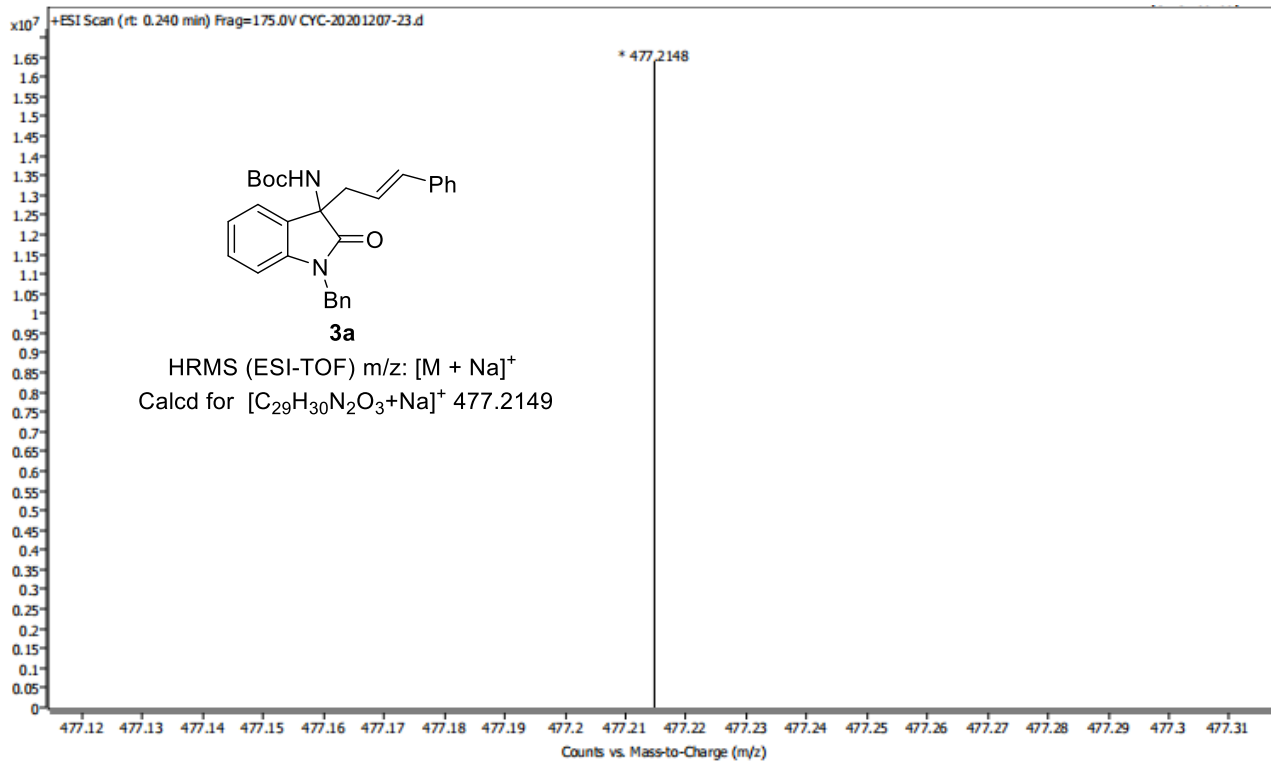

7.298  
7.293  
7.287  
7.275  
7.258  
7.250  
7.231  
7.169  
7.152  
7.115  
7.096  
7.089  
7.082  
7.071  
7.063  
6.574  
6.564  
6.531  
6.492  
5.954  
5.935  
5.915  
5.896  
5.242  
5.191  
5.157  
5.151  
4.663

2.830  
2.812  
2.797  
2.780  
2.740  
2.720  
2.687

1.596  
1.296

0.000

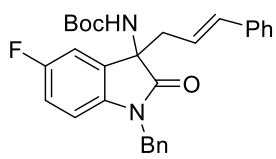

**3b**

<sup>1</sup>H NMR (400 MHz, CDCl<sub>3</sub>)

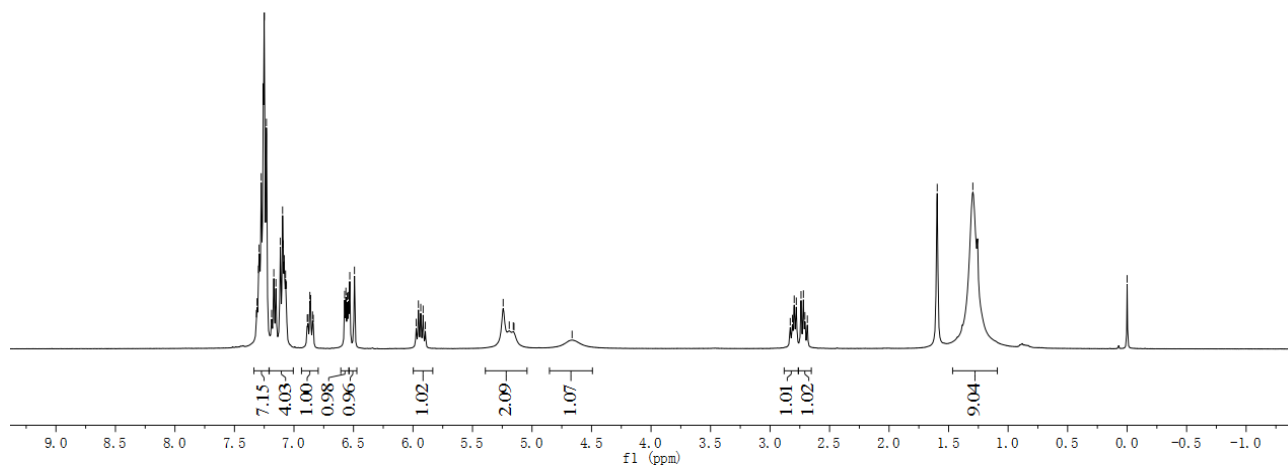

176.516

160.526  
158.129  
153.684

138.380  
136.319  
136.264  
135.381  
128.749  
128.655  
127.522  
127.152  
126.505  
120.411  
115.091  
114.857  
111.033  
110.785  
109.915

80.768  
77.358  
77.041  
76.724

61.747

44.330  
41.456

28.115

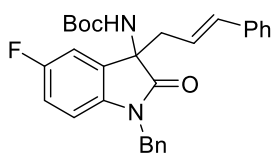

**3b**

<sup>13</sup>C NMR (100 MHz, CDCl<sub>3</sub>)

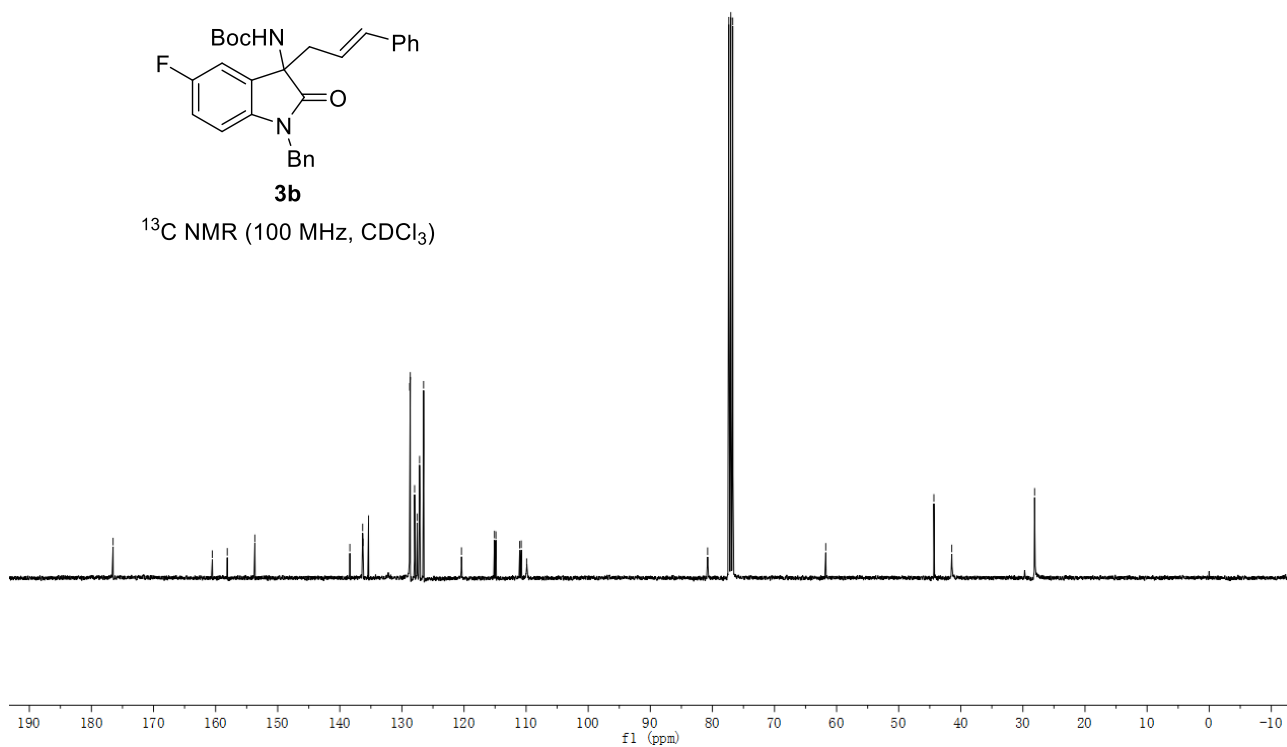

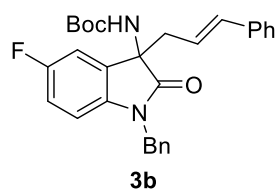

$^{19}\text{F}$  NMR (376 MHz,  $\text{CDCl}_3$ )

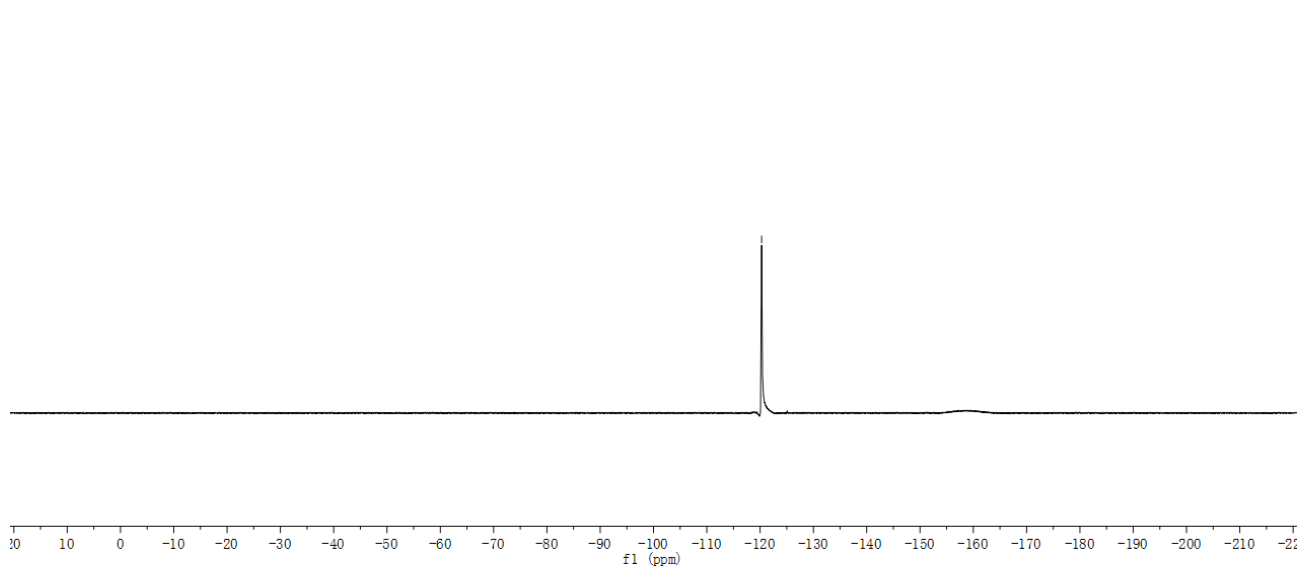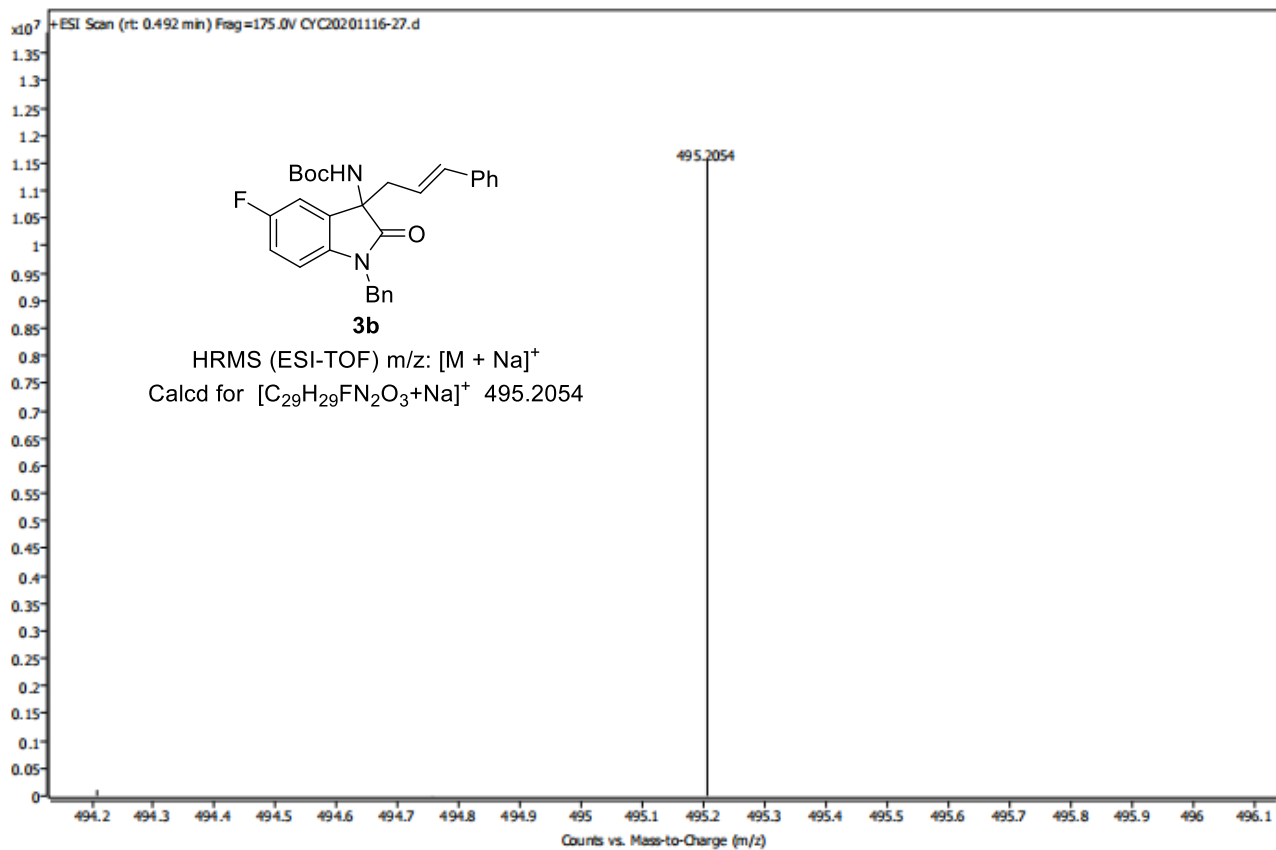



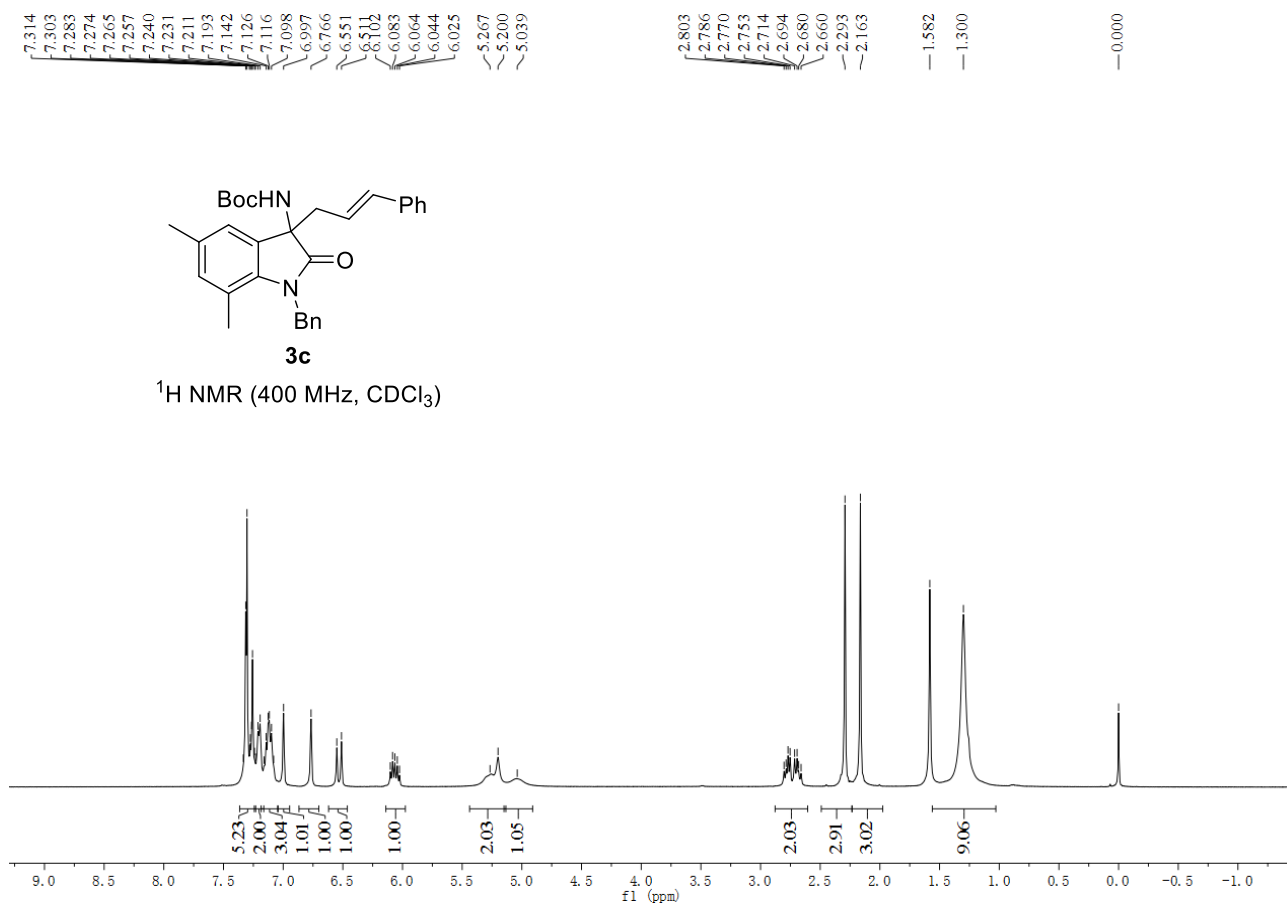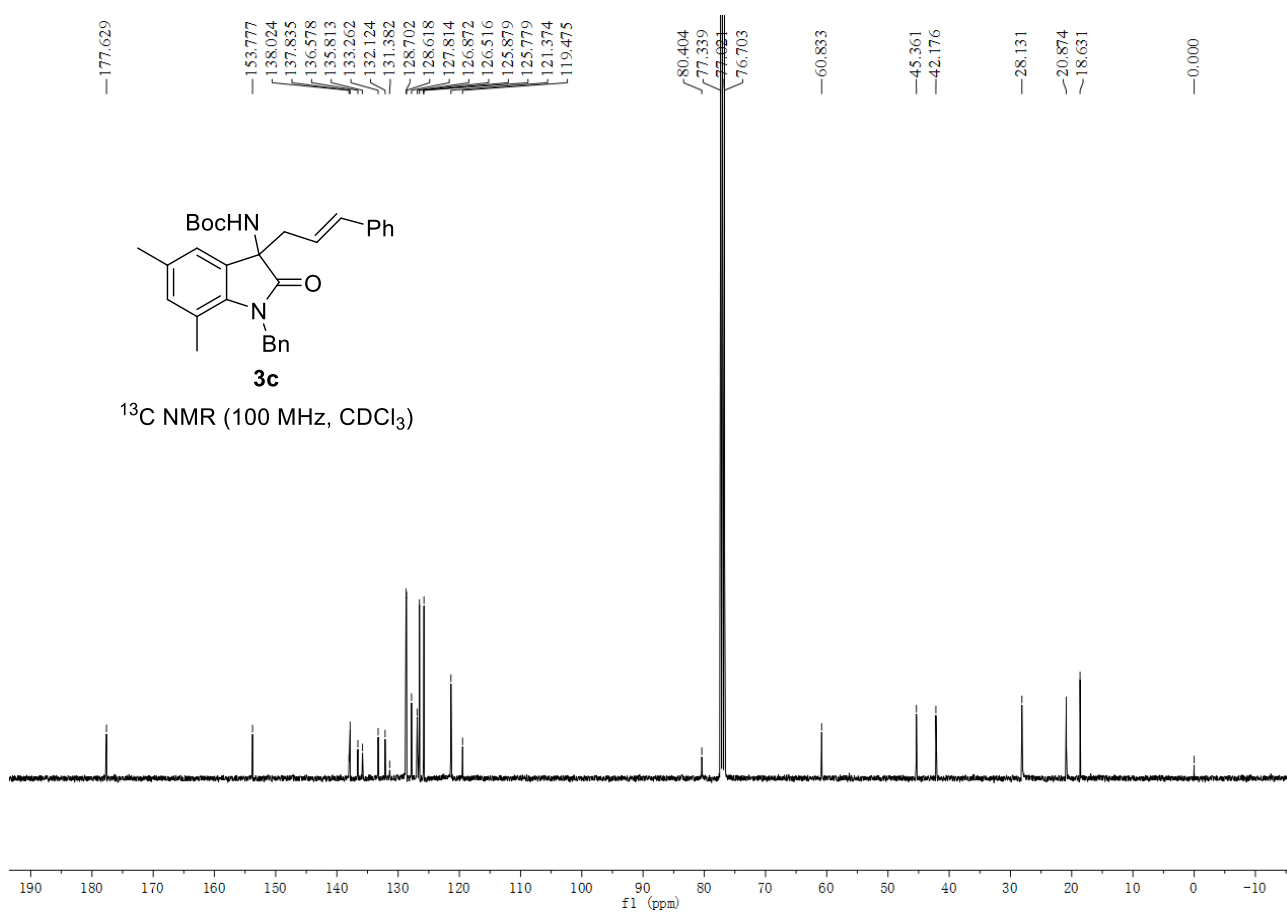

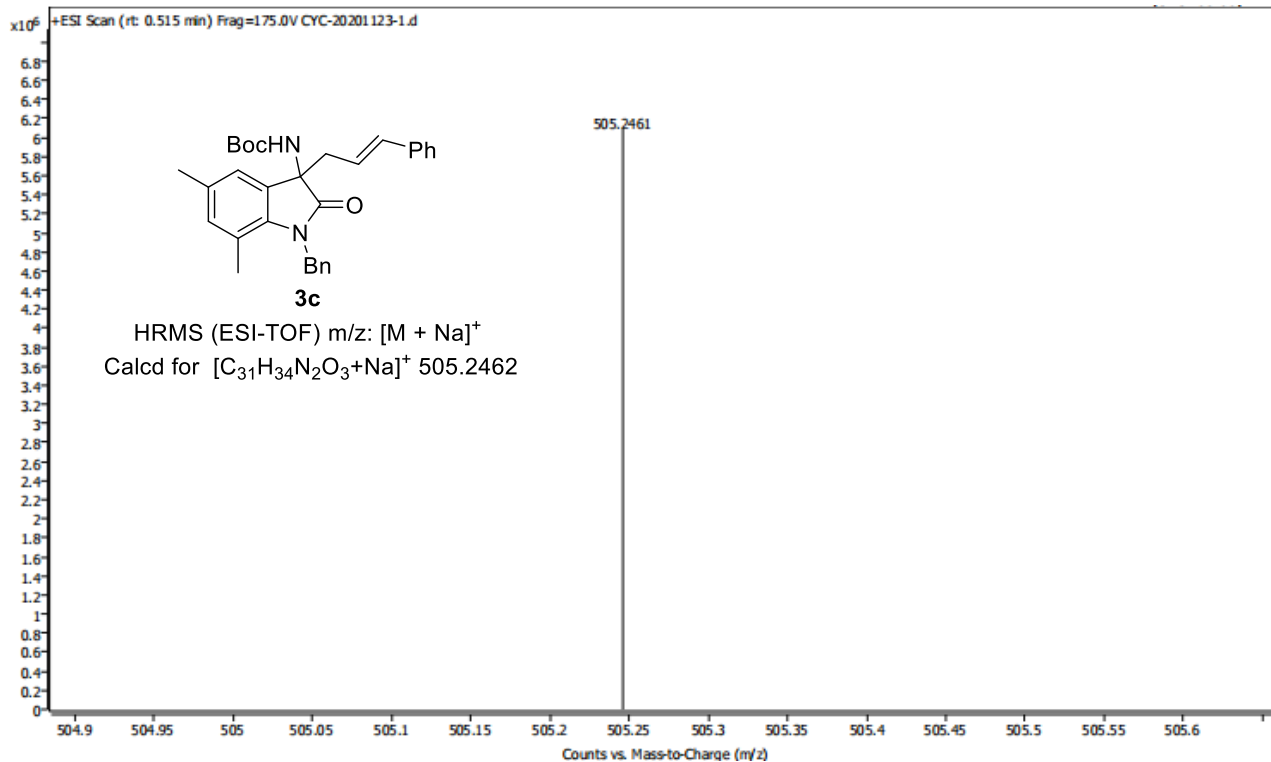

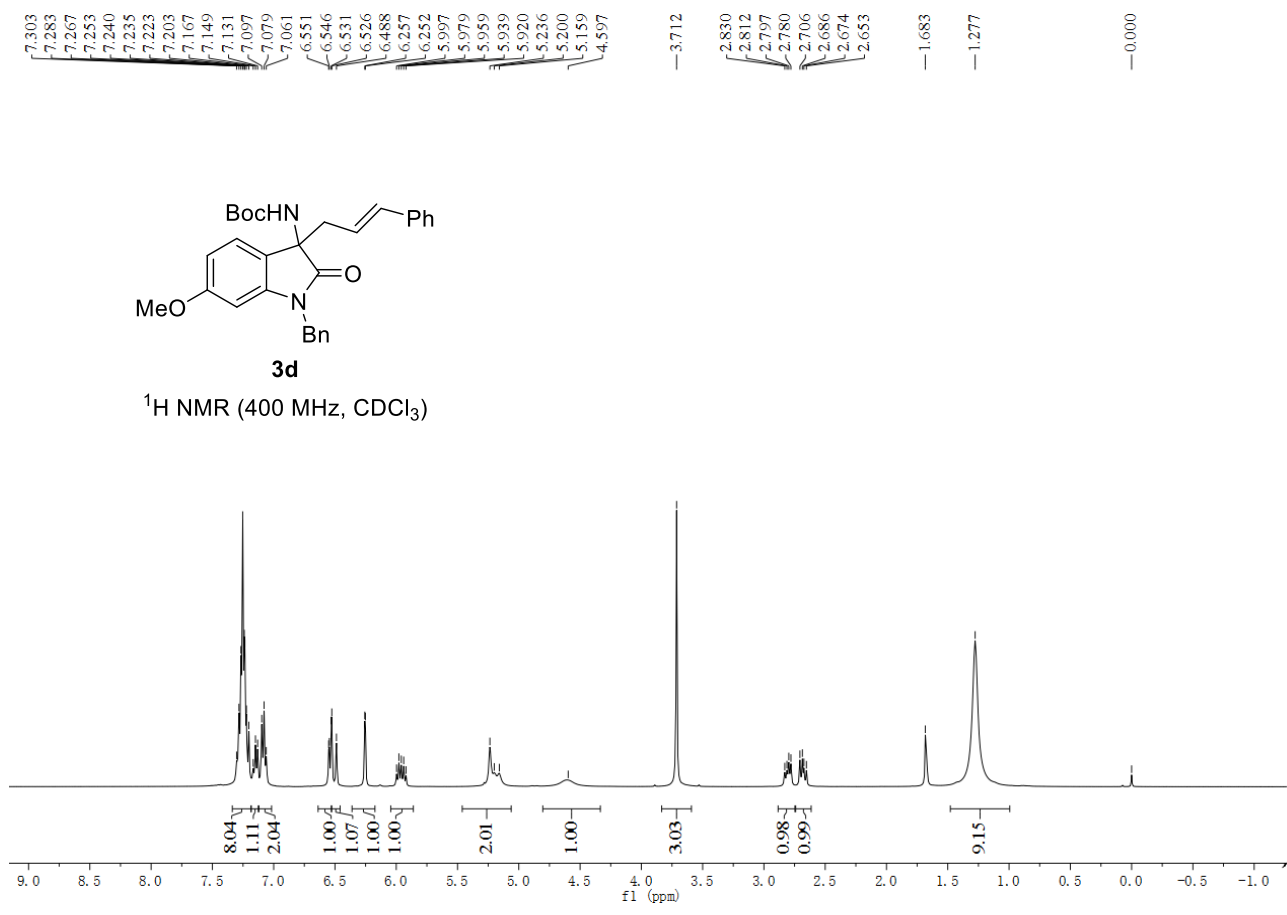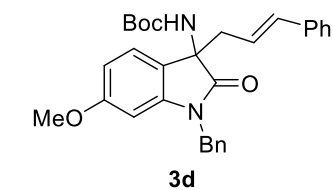

<sup>1</sup>H NMR (400 MHz, CDCl<sub>3</sub>)

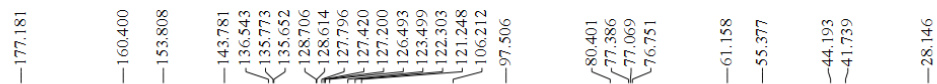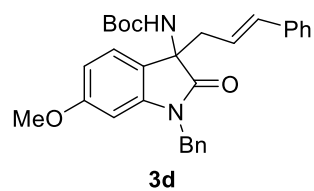

<sup>13</sup>C NMR (100 MHz, CDCl<sub>3</sub>)

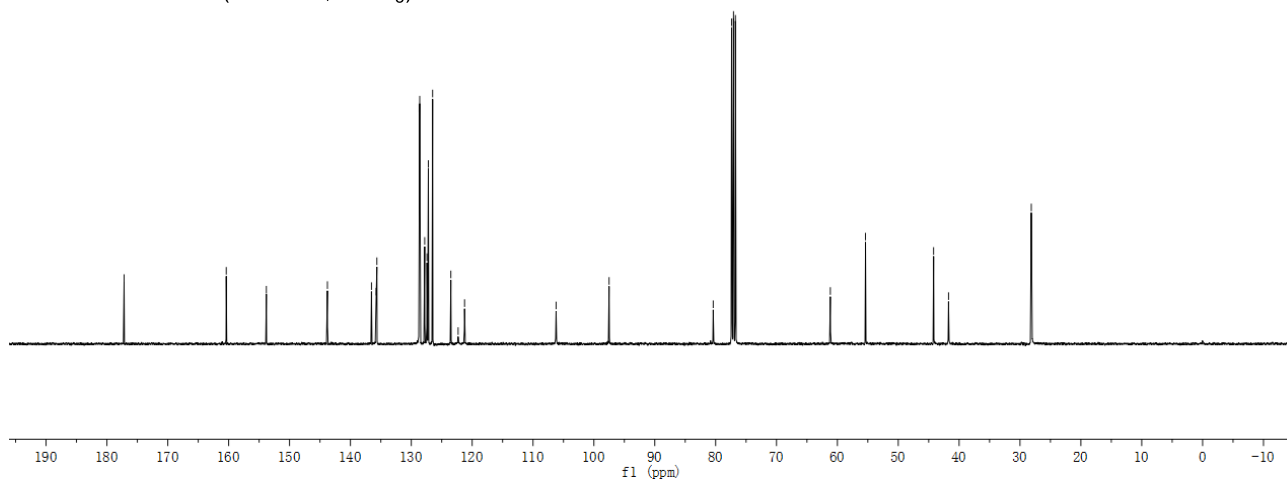

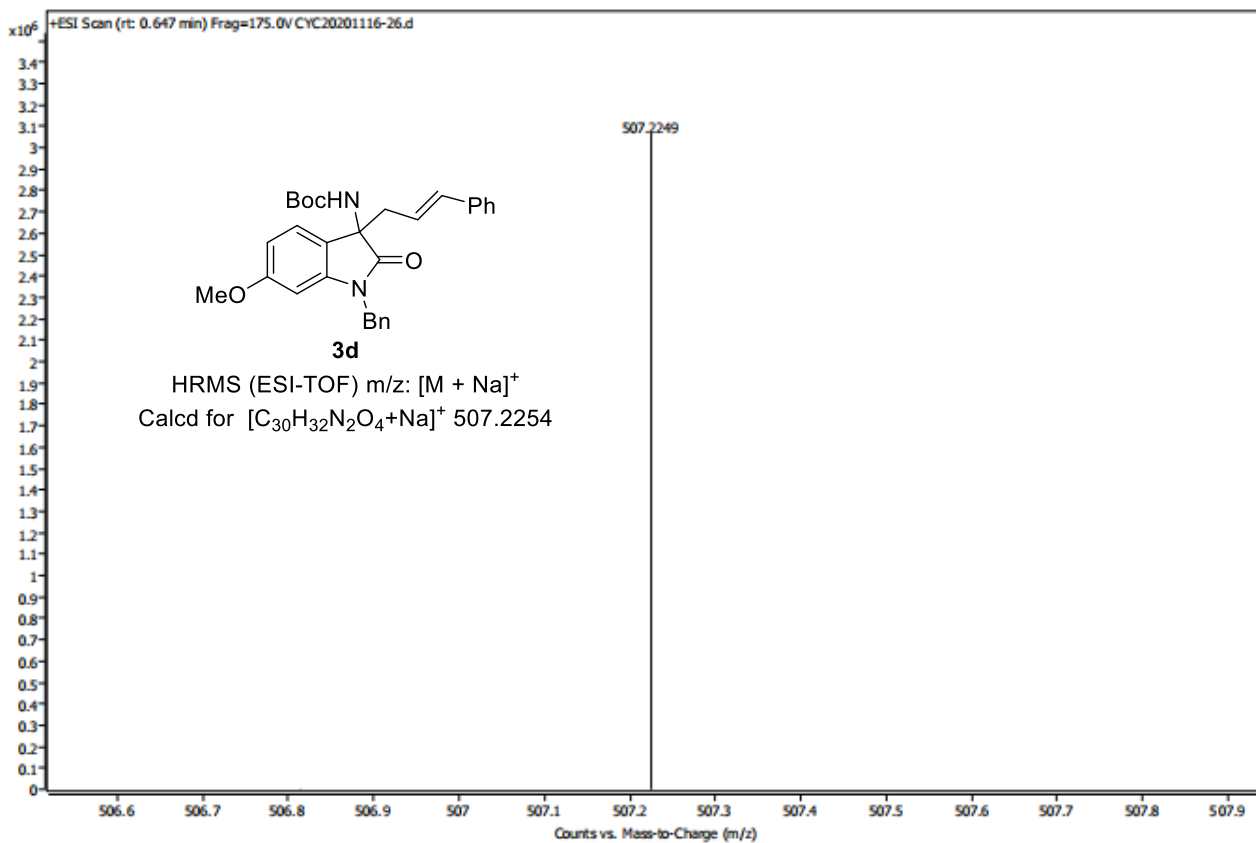

7.331  
7.310  
7.300  
7.284  
7.273  
7.265  
7.262  
7.253  
7.240  
7.215  
7.199  
7.193  
7.188  
7.176  
7.171  
7.150  
7.137  
7.133  
7.120  
7.102  
7.084  
7.005  
6.986  
6.969  
6.965  
6.951  
6.945  
6.545  
6.506  
6.102  
6.083  
6.064  
6.044  
5.250  
2.824  
2.807  
2.791  
2.774  
2.723  
2.703  
2.690  
2.669  
2.616  
1.628  
1.290  
0.000

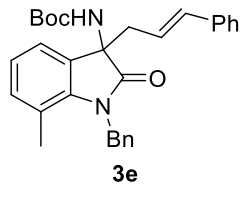

<sup>1</sup>H NMR (400 MHz, CDCl<sub>3</sub>)

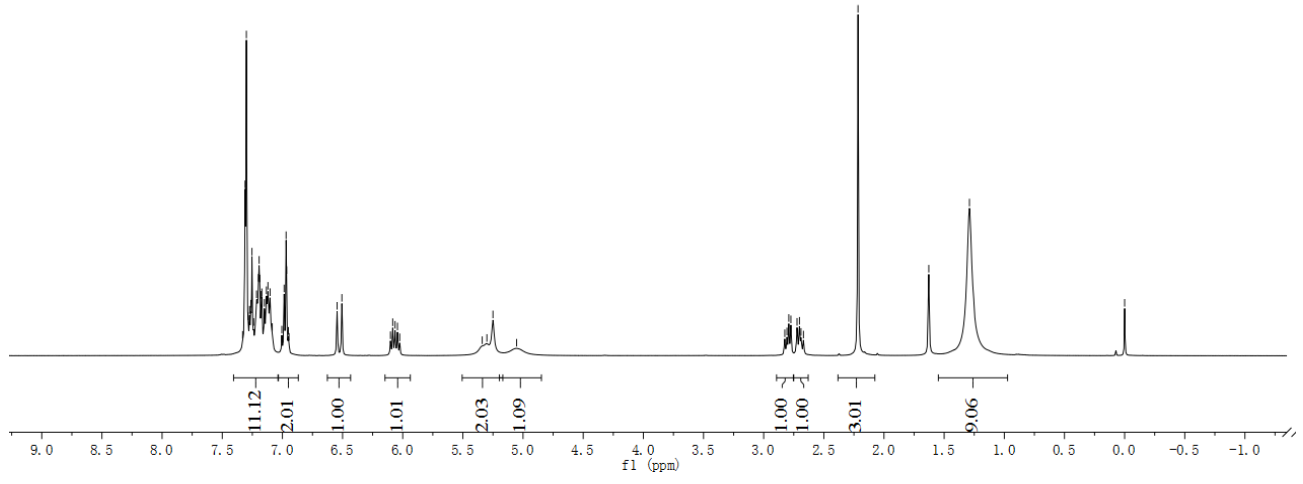

177.728  
153.722  
140.537  
137.789  
136.514  
135.910  
132.778  
131.297  
128.726  
128.620  
127.842  
126.924  
126.506  
125.765  
122.703  
121.182  
120.656  
119.804  
80.427  
77.343  
77.026  
76.708  
60.755  
45.406  
42.057  
28.100  
18.789  
0.000

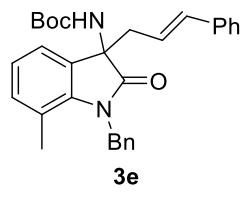

<sup>13</sup>C NMR (100 MHz, CDCl<sub>3</sub>)

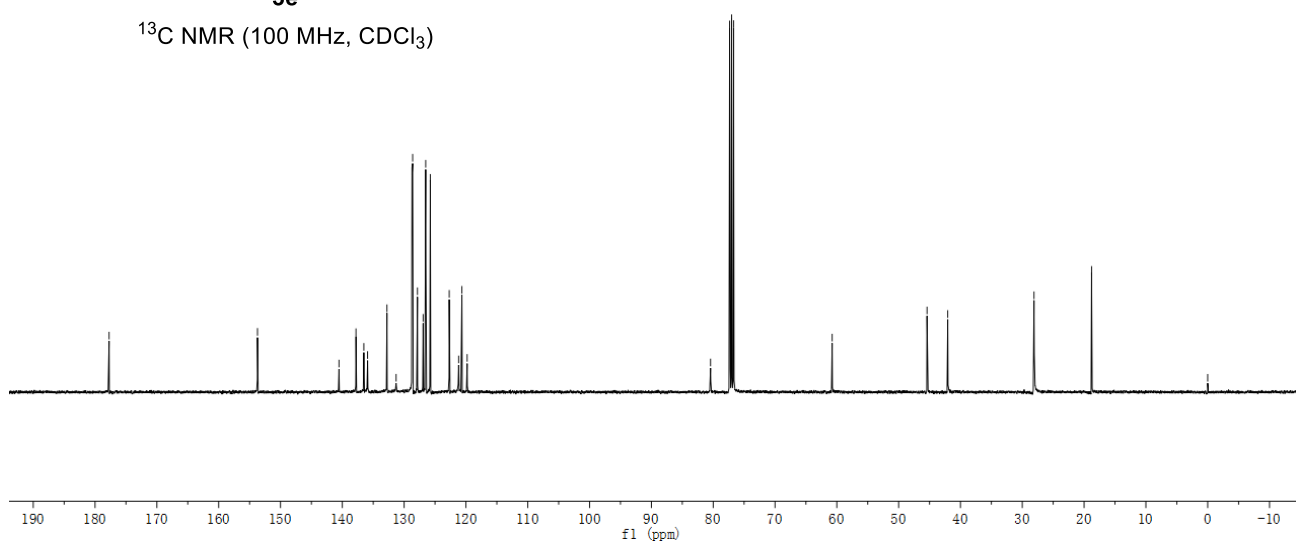

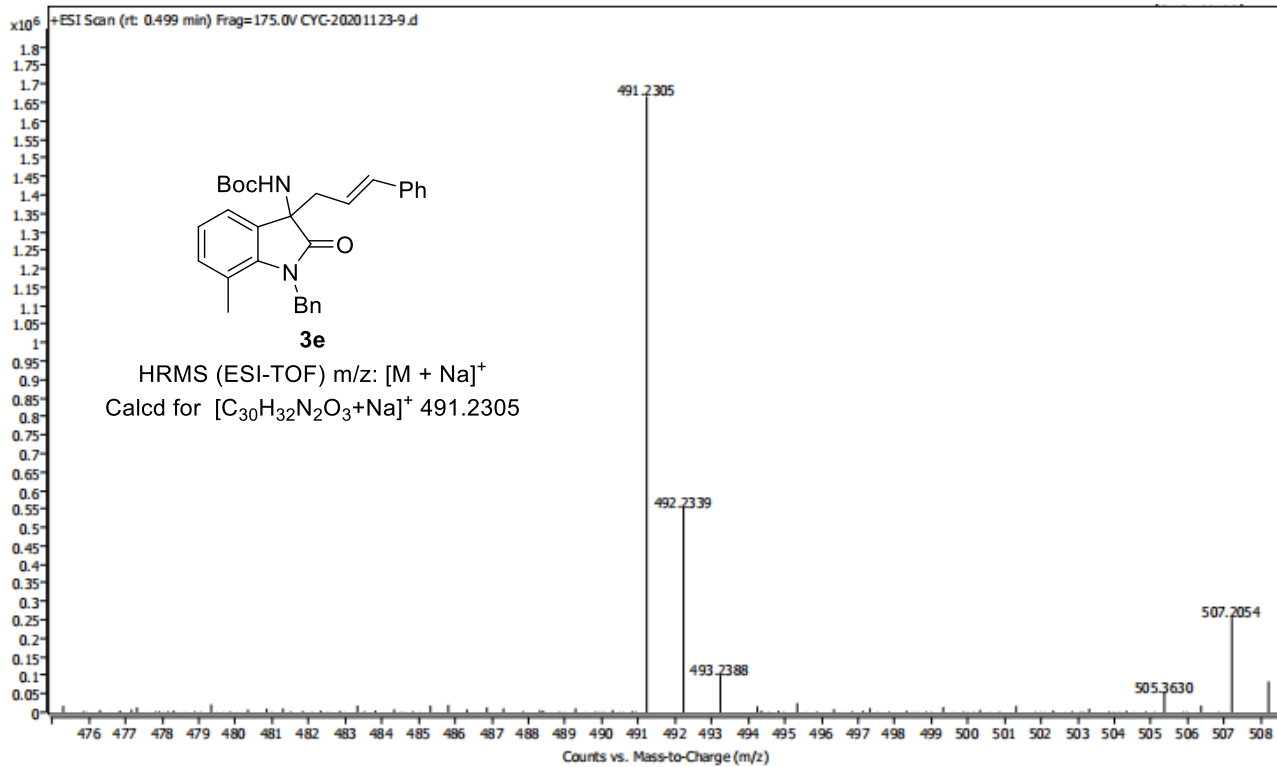

7.311  
7.307  
7.293  
7.285  
7.277  
7.267  
7.259  
7.255  
7.221  
7.203  
7.162  
7.145  
7.139  
7.122  
6.991  
6.482  
6.030  
6.032  
6.012  
5.992  
5.974  
5.402  
5.362  
5.339  
5.284

2.798  
2.780  
2.764  
2.746  
2.695  
2.675  
2.662  
2.642

— 1.617  
— 1.292

— 0.000

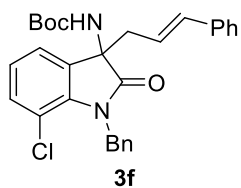

<sup>1</sup>H NMR (400 MHz, CDCl<sub>3</sub>)

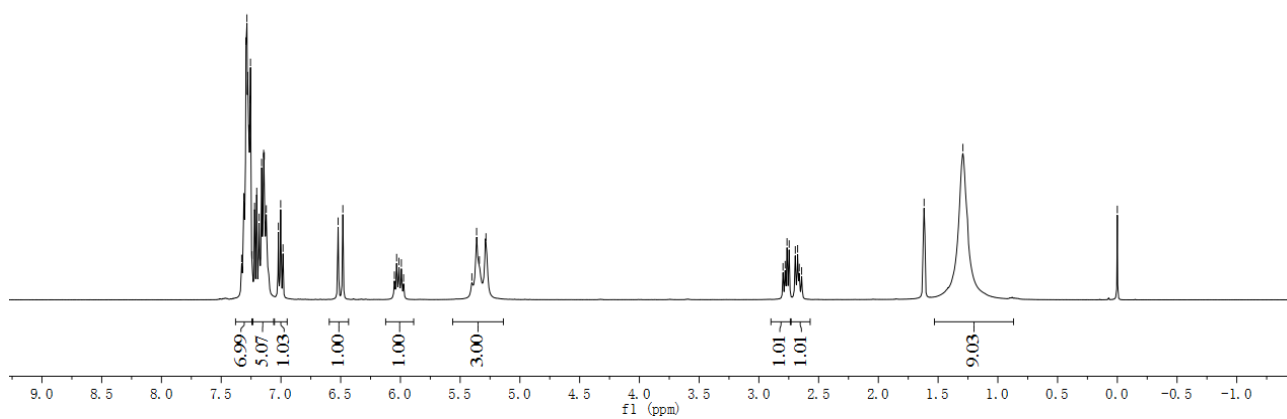

— 177.319

153.647  
138.583  
137.634  
136.363  
136.282  
133.583  
131.338  
128.643  
128.438  
127.980  
126.894  
126.515  
126.473  
123.516  
121.229  
120.394  
115.567

80.825  
77.342  
77.024  
76.706

— 60.930

— 45.156  
— 41.808

— 28.065

— 0.000

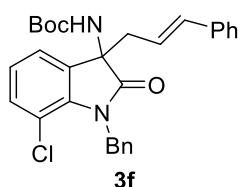

<sup>13</sup>C NMR (100 MHz, CDCl<sub>3</sub>)

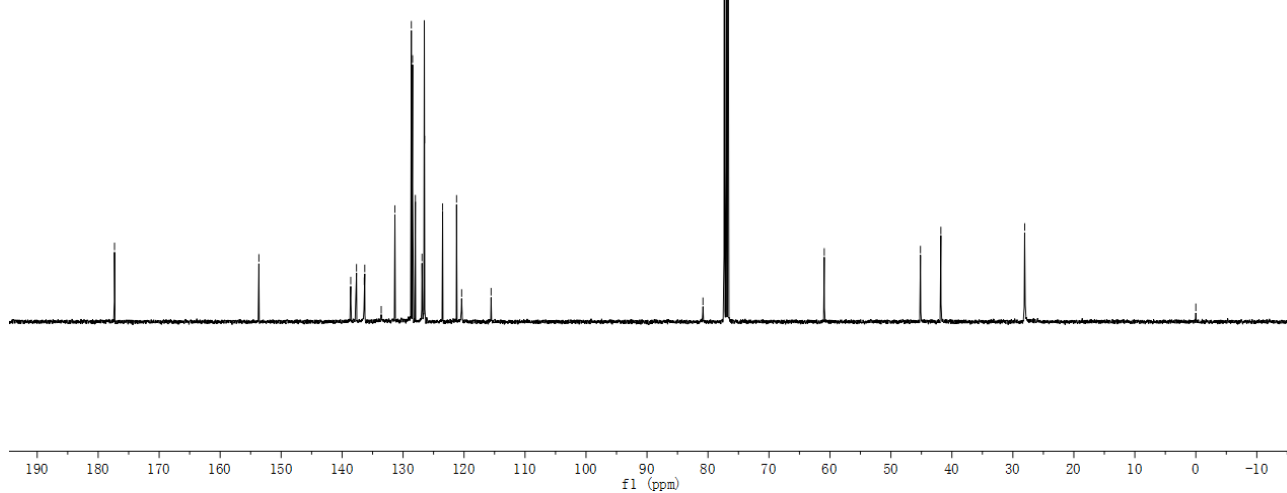

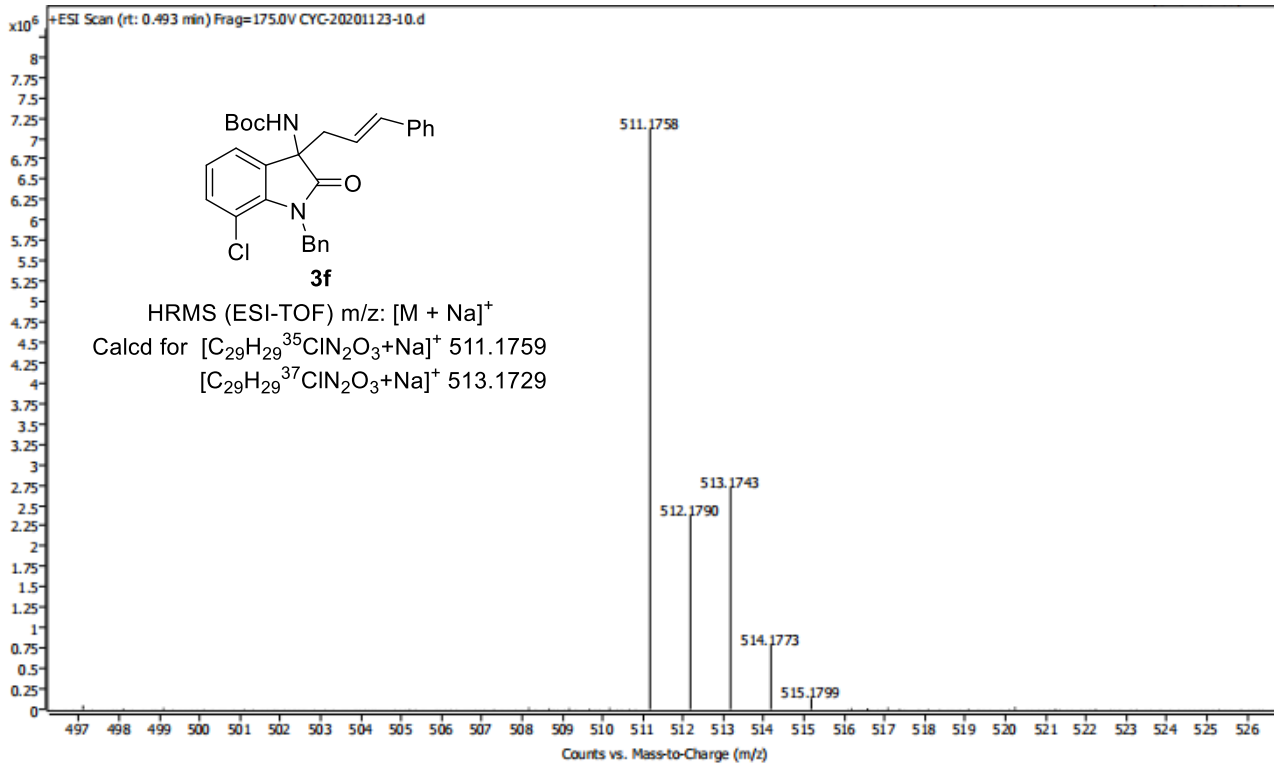



7.349  
7.331  
7.284  
7.266  
7.255  
7.241  
7.229  
7.210  
7.177  
7.159  
7.141  
7.092  
7.075  
6.989  
6.858  
6.458  
5.999  
5.980  
5.961  
5.941  
5.922  
5.290  
5.238  
5.201  
4.919

2.782  
2.763  
2.748  
2.730  
2.680  
2.661  
2.647  
2.627

1.585  
1.260  
0.000

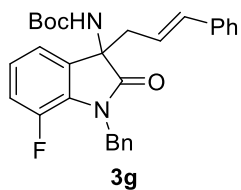

$^1\text{H NMR}$  (400 MHz,  $\text{CDCl}_3$ )

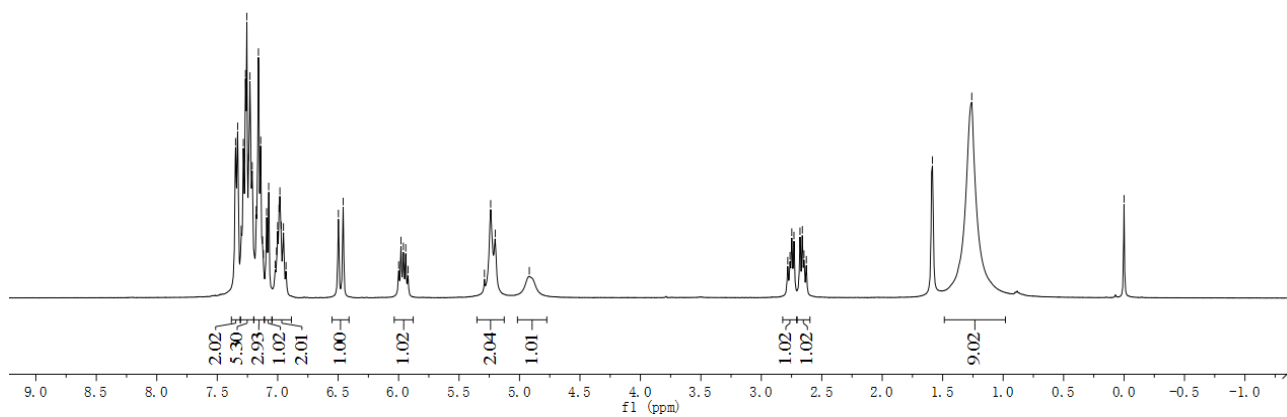

176.444

153.664  
148.741  
146.311

137.037  
136.299  
136.232

129.044  
128.957  
128.608  
128.481  
127.916  
127.426  
127.338  
126.463  
123.327  
123.264  
120.435  
118.573  
118.541  
117.091  
116.895

80.762  
77.339  
77.023  
76.706

61.474

45.690  
45.643  
41.658

28.031

0.000

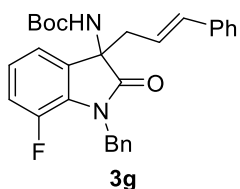

$^{13}\text{C NMR}$  (100 MHz,  $\text{CDCl}_3$ )

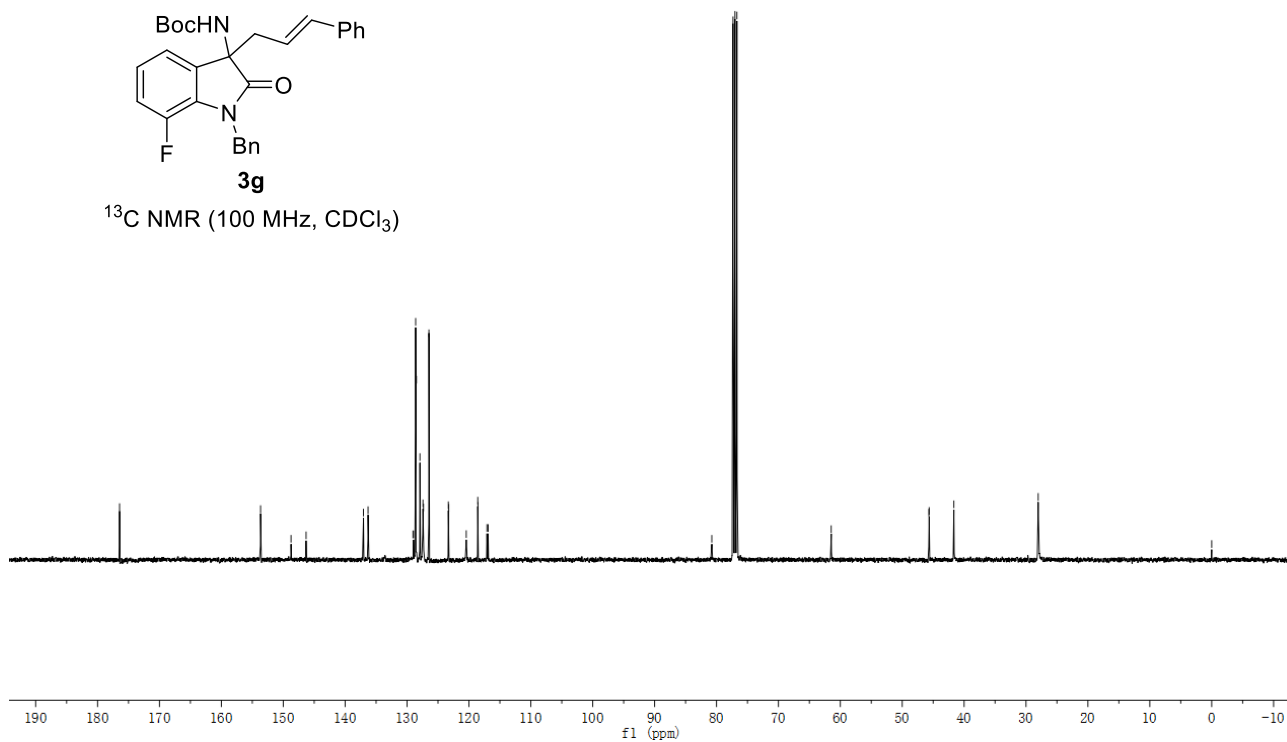

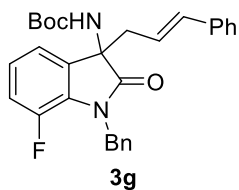

$^{19}\text{F}$  NMR (376 MHz,  $\text{CDCl}_3$ )

—133.780

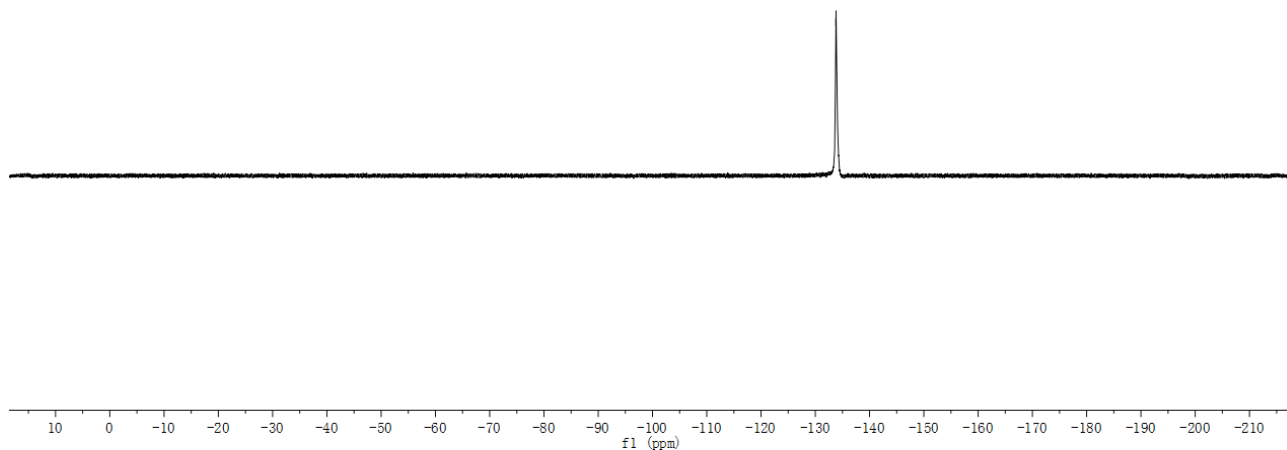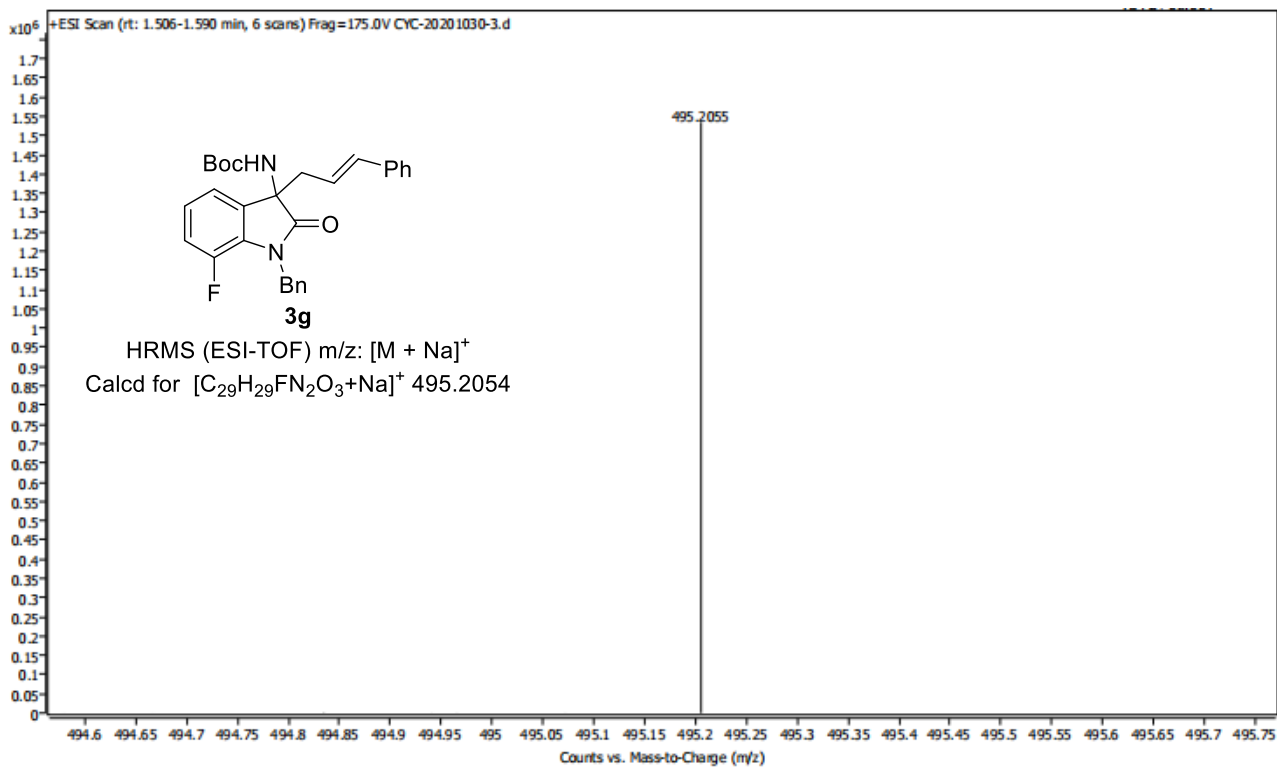

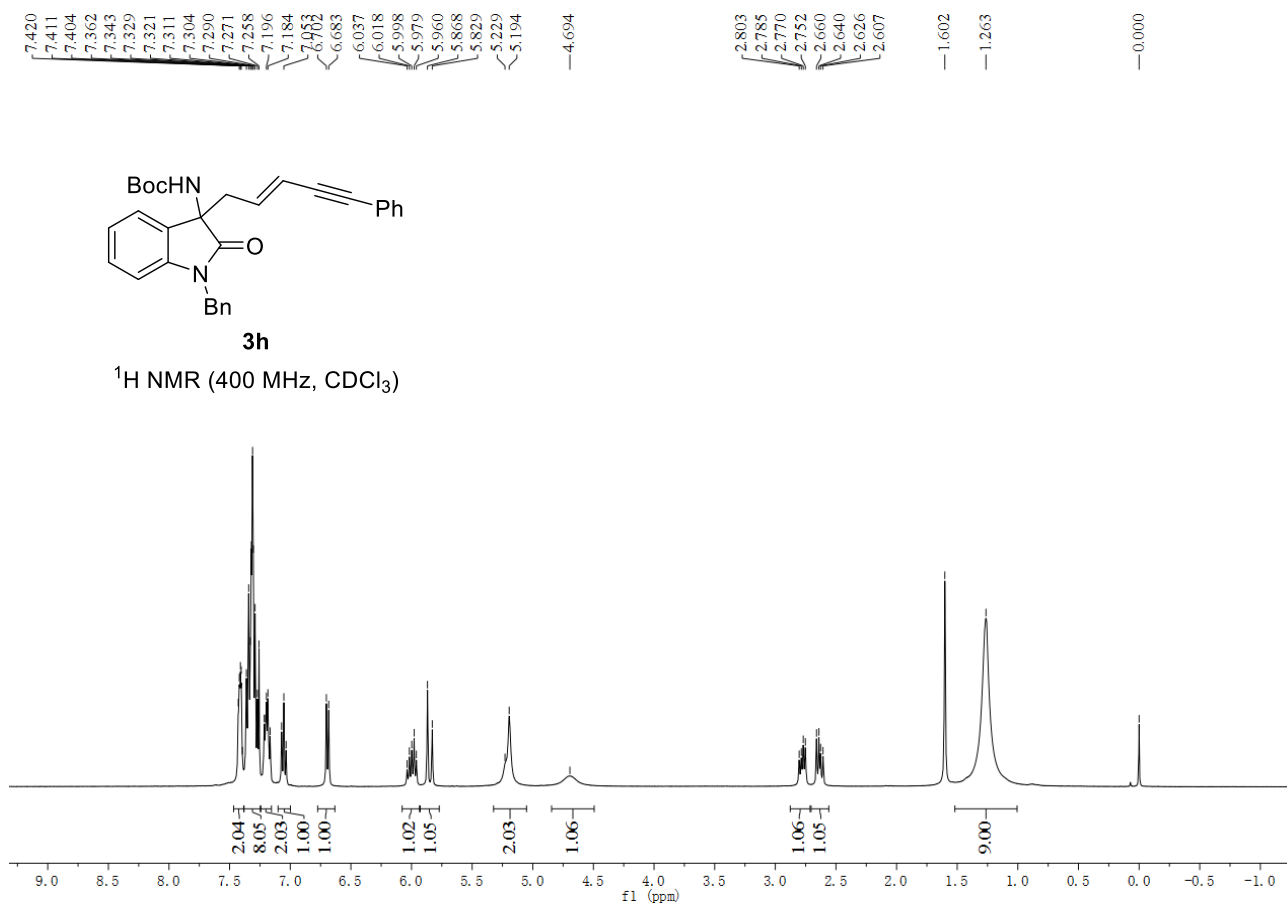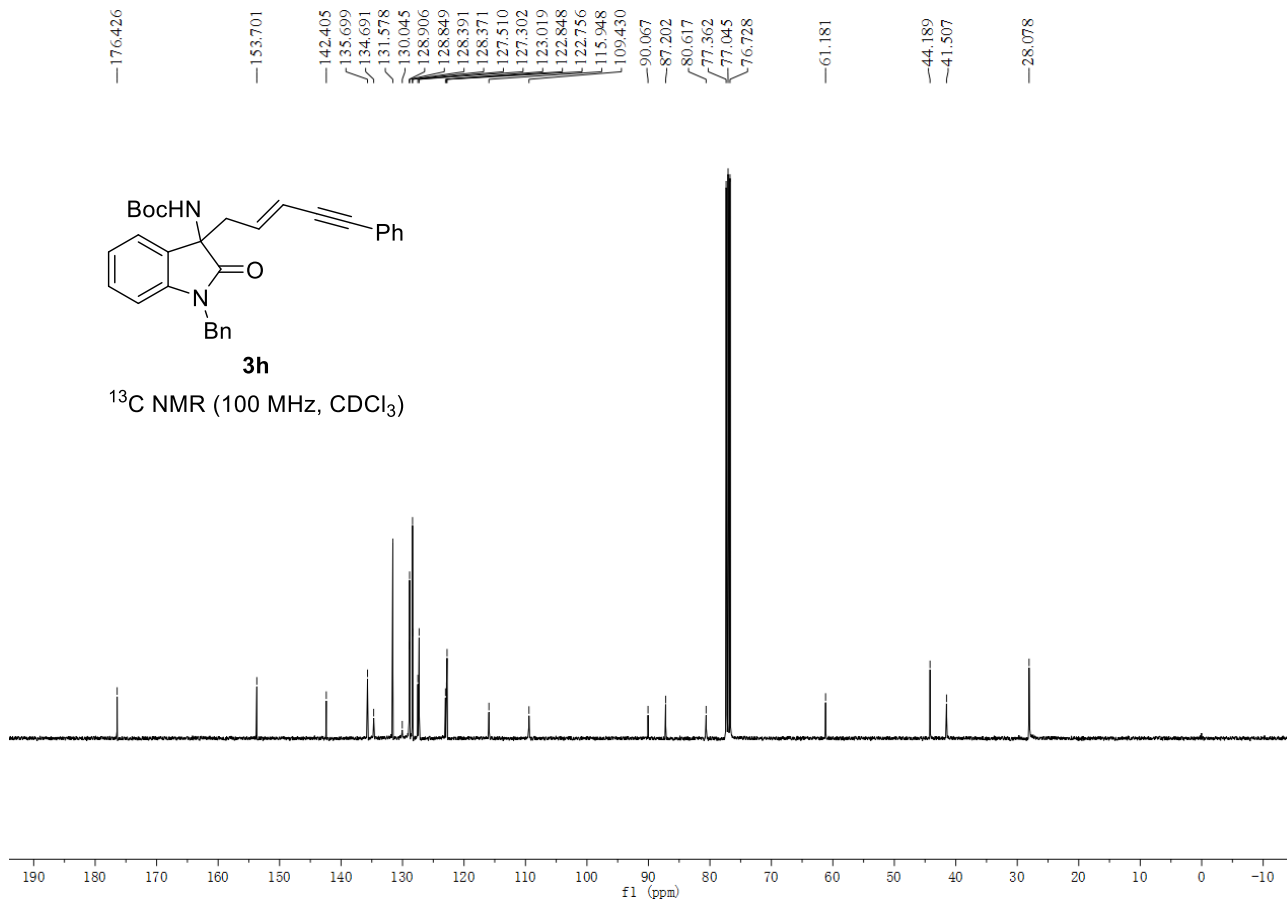

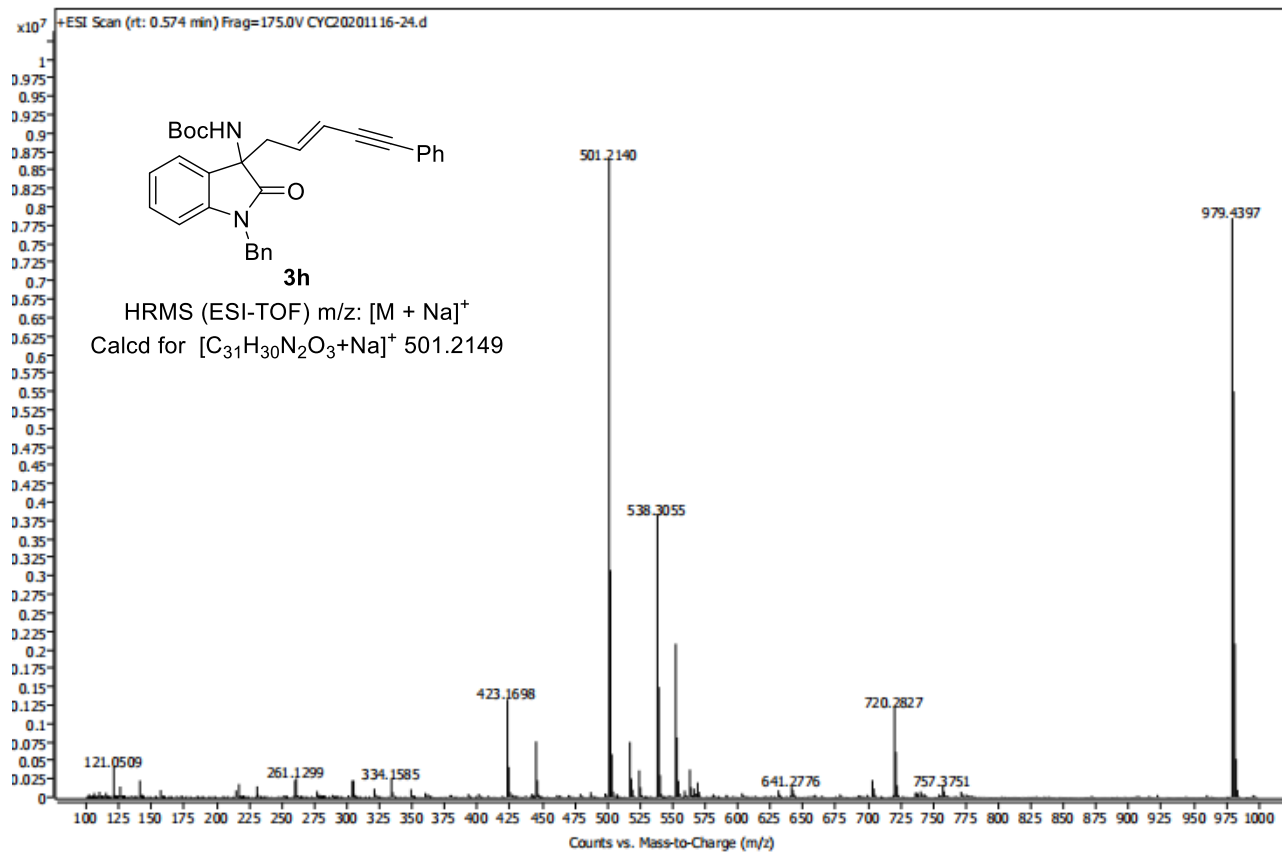

7.303  
7.292  
7.272  
7.270  
7.261  
7.250  
7.240  
7.229  
7.218  
6.511  
6.472  
5.962  
5.938  
5.918  
5.024  
2.665  
2.654  
2.637  
2.620  
2.602  
2.555  
2.536  
1.443  
1.396  
1.267  
1.250  
1.230  
1.213

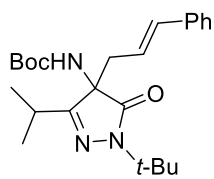

**5a**

<sup>1</sup>H NMR (400 MHz, CDCl<sub>3</sub>)

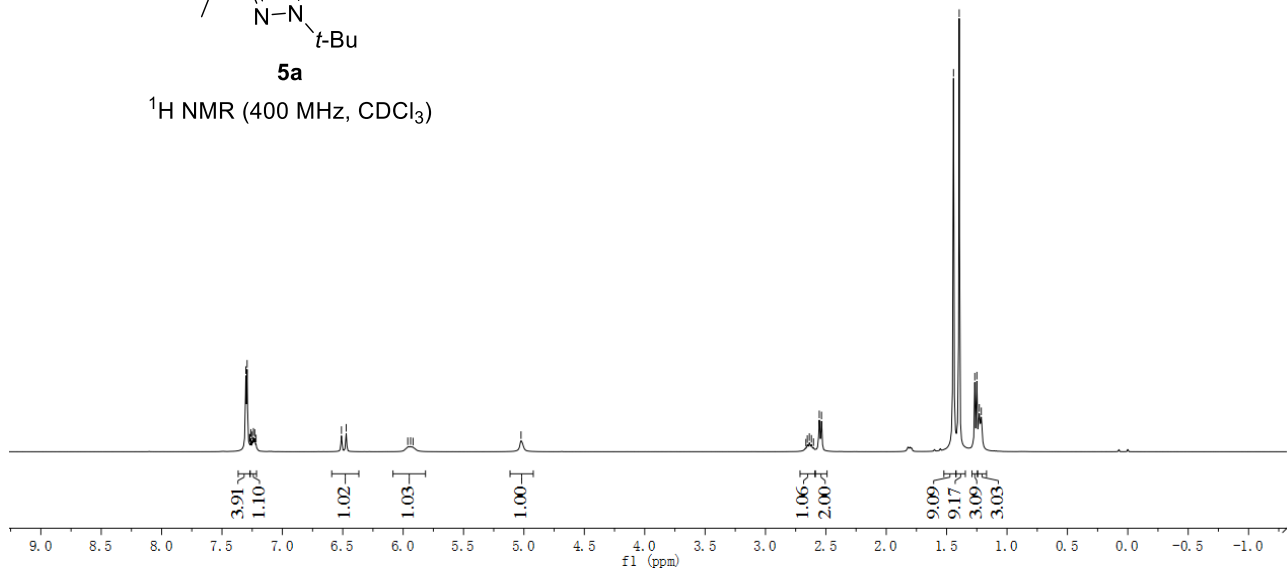

173.872  
162.828  
153.632  
136.495  
135.677  
128.599  
127.829  
126.353  
120.078  
77.374  
77.057  
76.740  
65.741  
57.470  
38.230  
28.191  
28.097  
20.842  
20.409

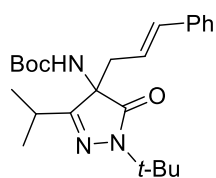

**5a**

<sup>13</sup>C NMR (100 MHz, CDCl<sub>3</sub>)

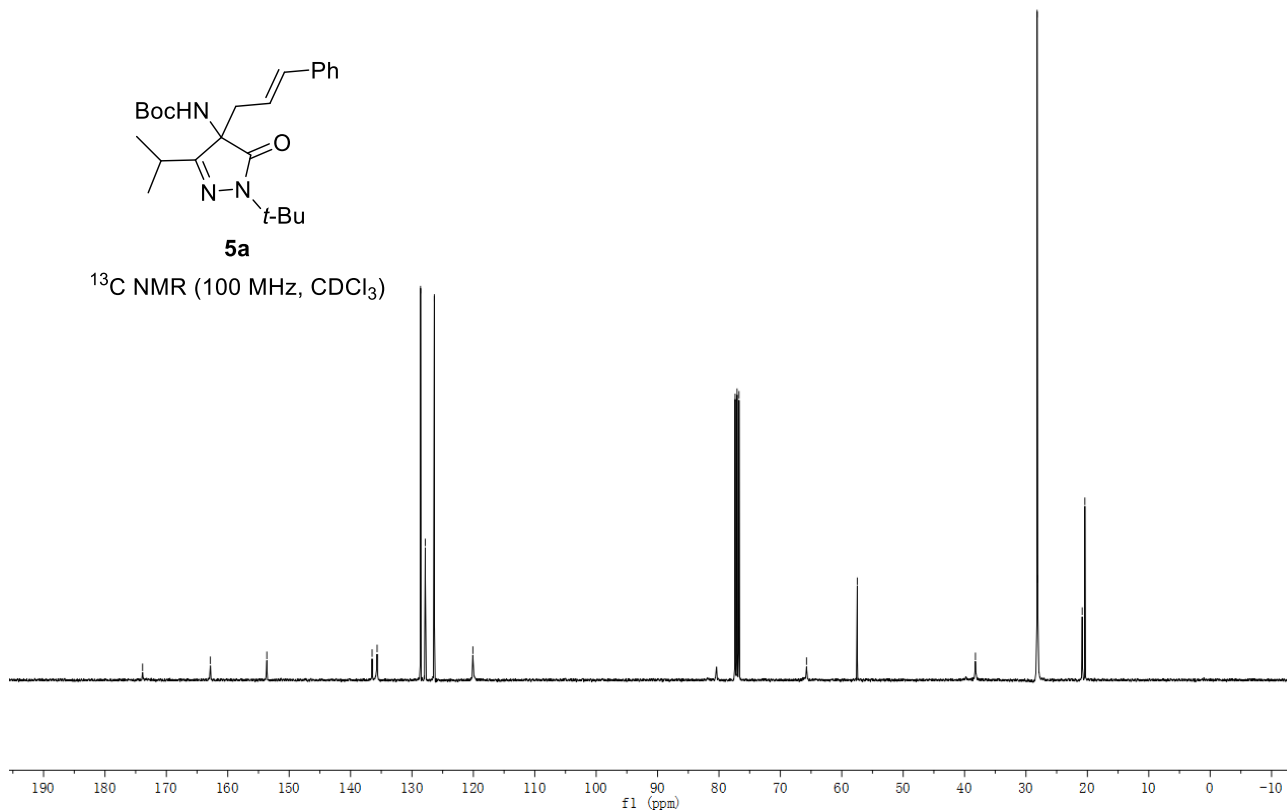

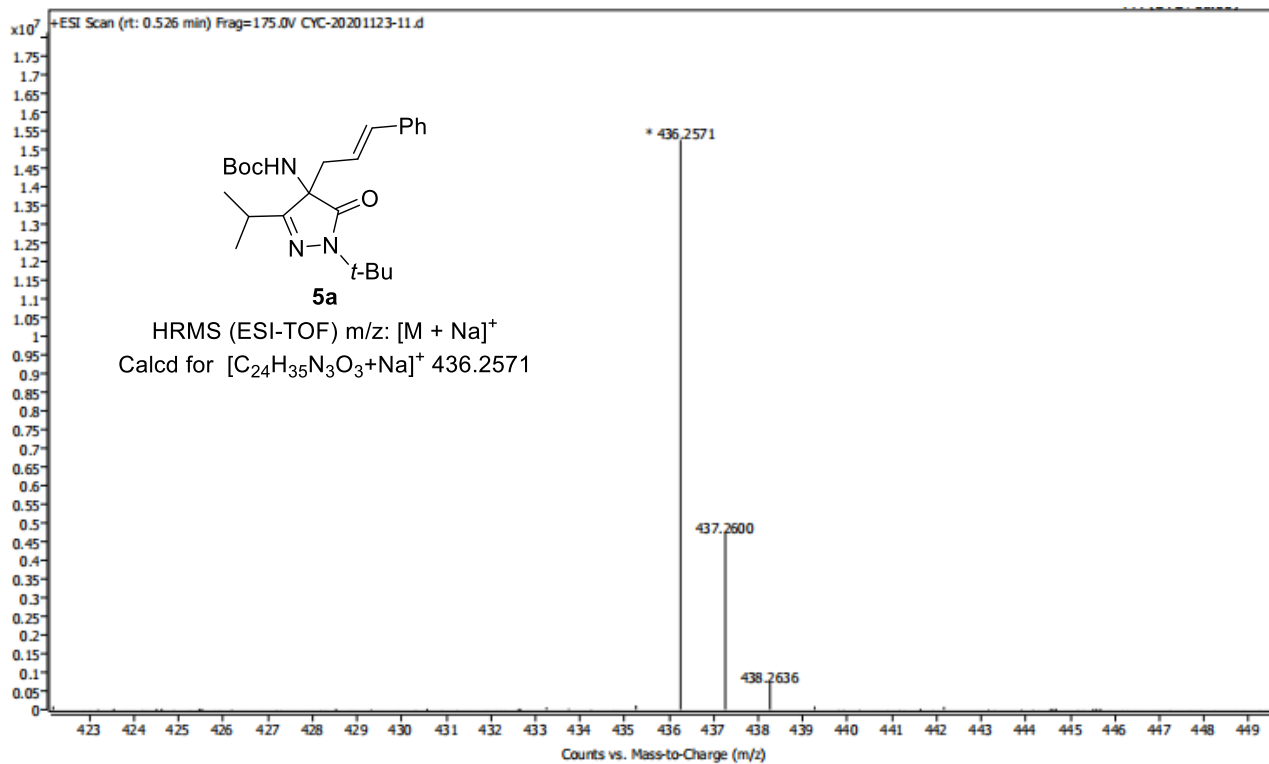

7.329  
7.322  
7.309  
7.302  
7.294  
7.279  
7.274  
7.262  
7.252  
7.238  
7.231  
7.222  
7.216  
7.209  
6.509  
6.470  
5.997  
5.978  
5.959  
5.939  
5.920

— 5.083

2.527  
2.524  
2.520  
2.516  
2.507  
2.503  
2.499  
2.370  
2.366  
2.351  
2.348  
2.333  
2.329  
2.314  
2.311  
1.456  
1.394  
1.252  
1.234  
1.215

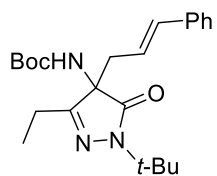

**5b**

$^1\text{H NMR}$  (400 MHz,  $\text{CDCl}_3$ )

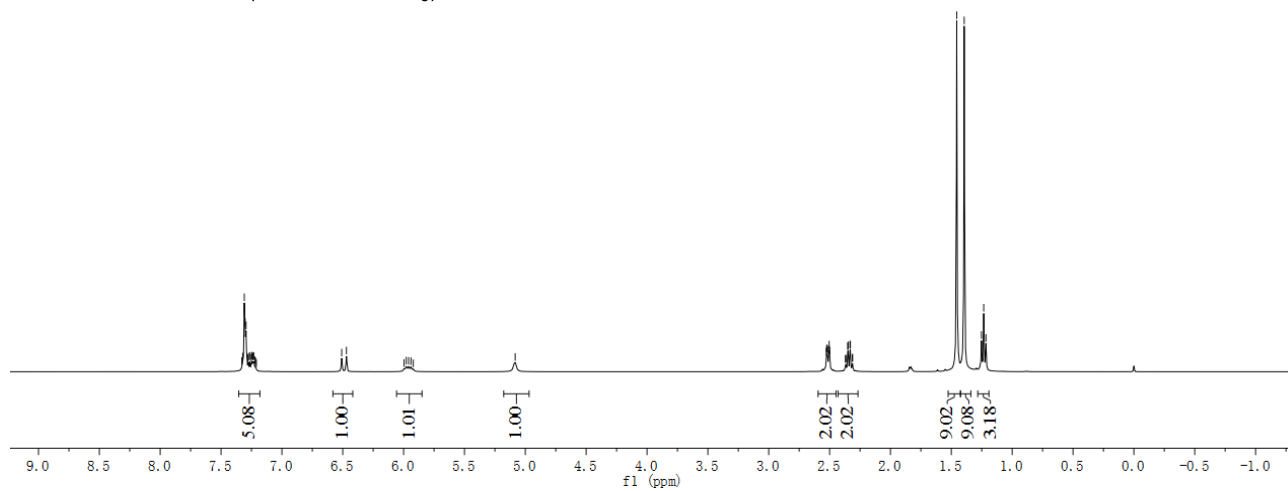

173.980  
160.585  
153.718  
136.461  
135.739  
128.575  
127.835  
126.378  
126.341  
119.962

80.685  
77.356  
77.038  
76.721  
65.628  
57.441  
38.264  
28.168  
28.135  
21.081  
9.463

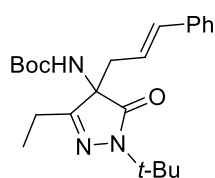

**5b**

$^{13}\text{C NMR}$  (100 MHz,  $\text{CDCl}_3$ )

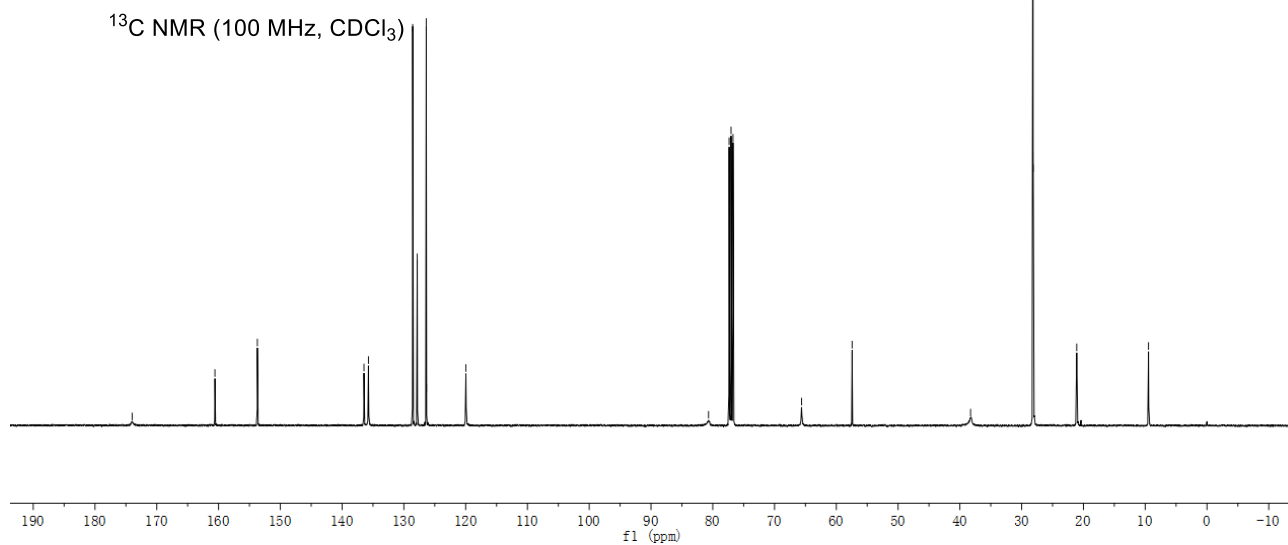

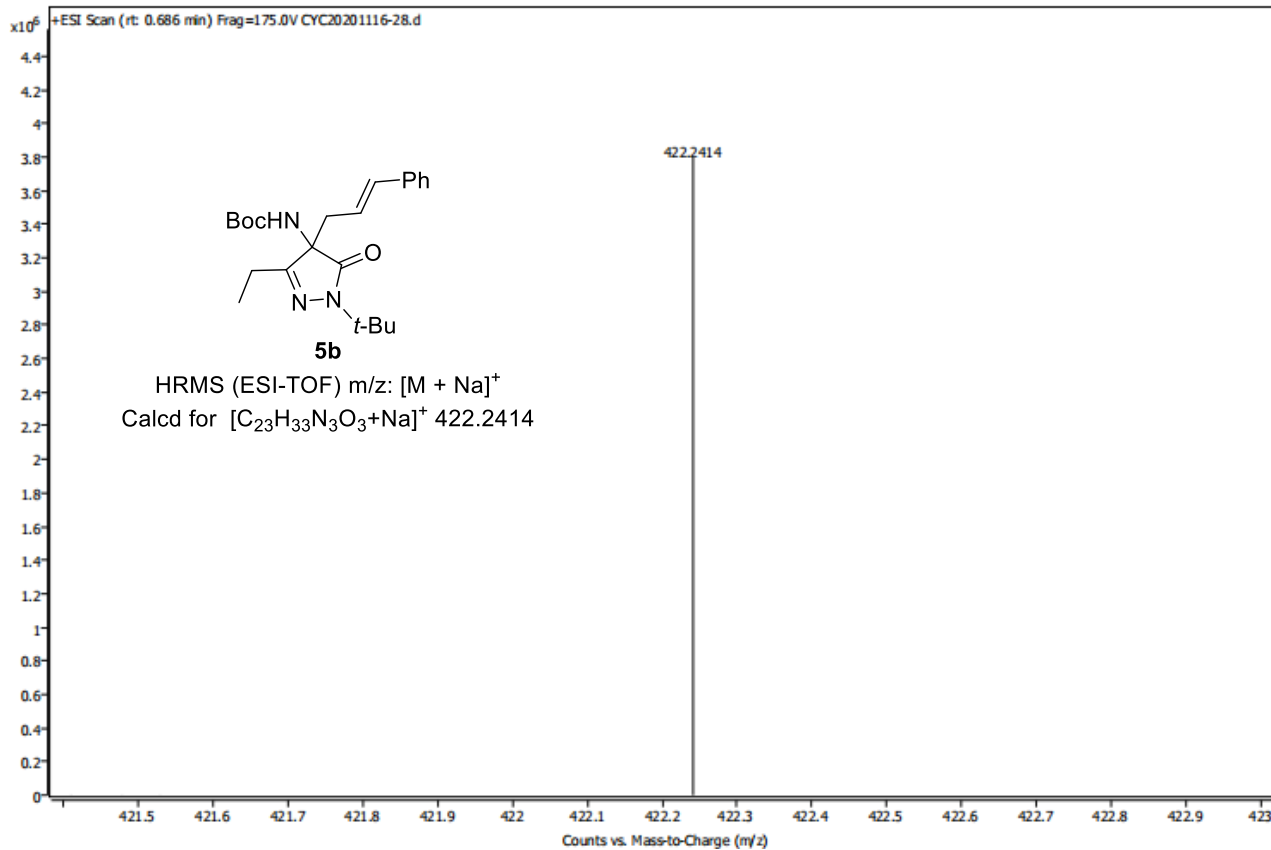



8.220  
8.201  
7.670  
7.651  
7.632  
7.599  
7.579  
7.476  
7.458  
7.439  
7.251  
7.232  
7.214  
7.195  
7.180  
7.162  
7.039  
7.022  
6.182  
6.143  
5.653  
5.552  
5.533  
5.513  
5.494  
5.475  
5.239  
5.203  
5.163  
5.129

2.773  
2.743  
2.719  
2.658  
2.641  
2.625  
2.607  
— 1.650  
— 1.328  
— 0.899  
— 0.000

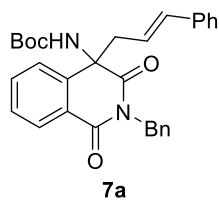

<sup>1</sup>H NMR (400 MHz, CDCl<sub>3</sub>)

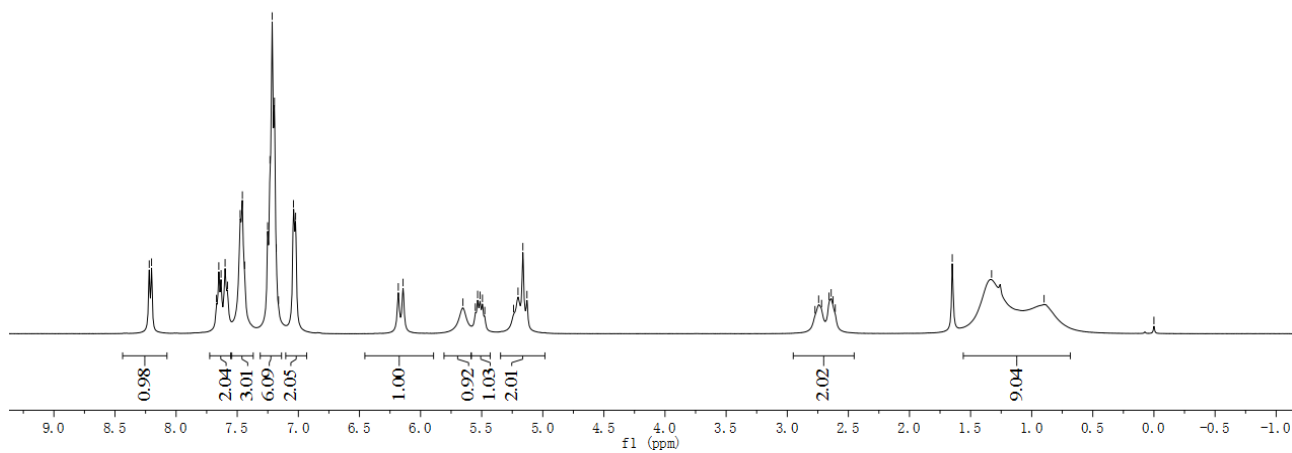

173.645  
163.713  
136.893  
136.461  
136.036  
134.002  
128.927  
128.542  
128.387  
128.041  
128.006  
127.475  
126.427  
125.143  
124.498  
119.684  
81.072  
77.385  
77.067  
76.750  
61.738  
46.999  
43.996  
28.109

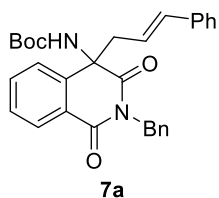

<sup>13</sup>C NMR (100 MHz, CDCl<sub>3</sub>)

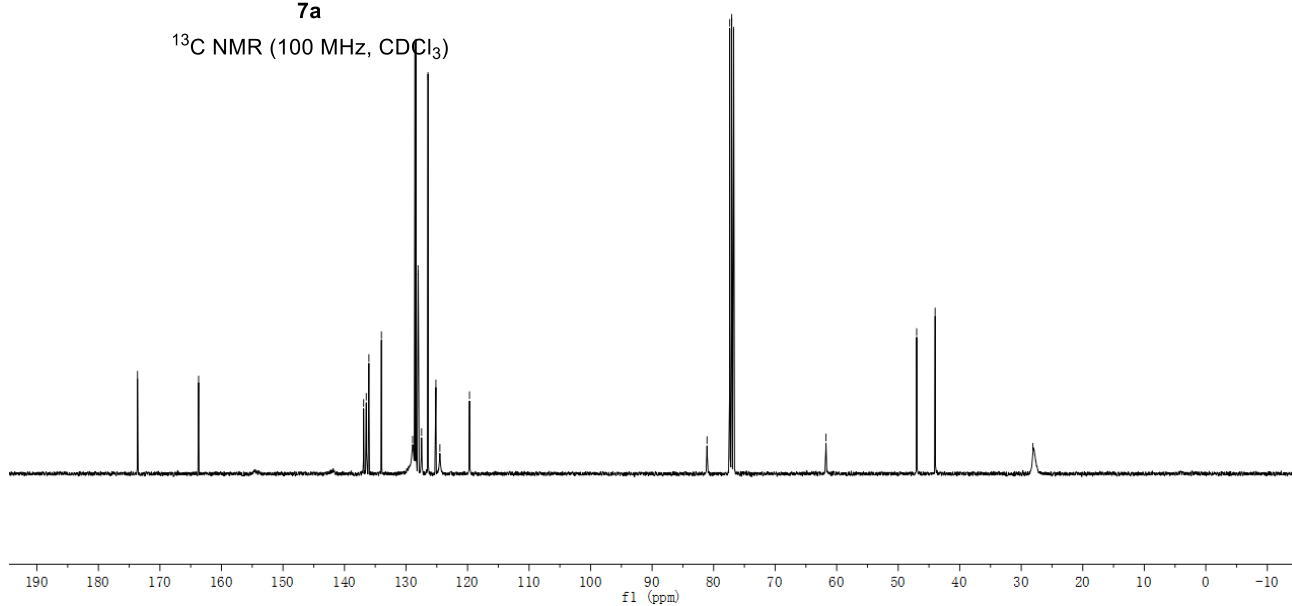

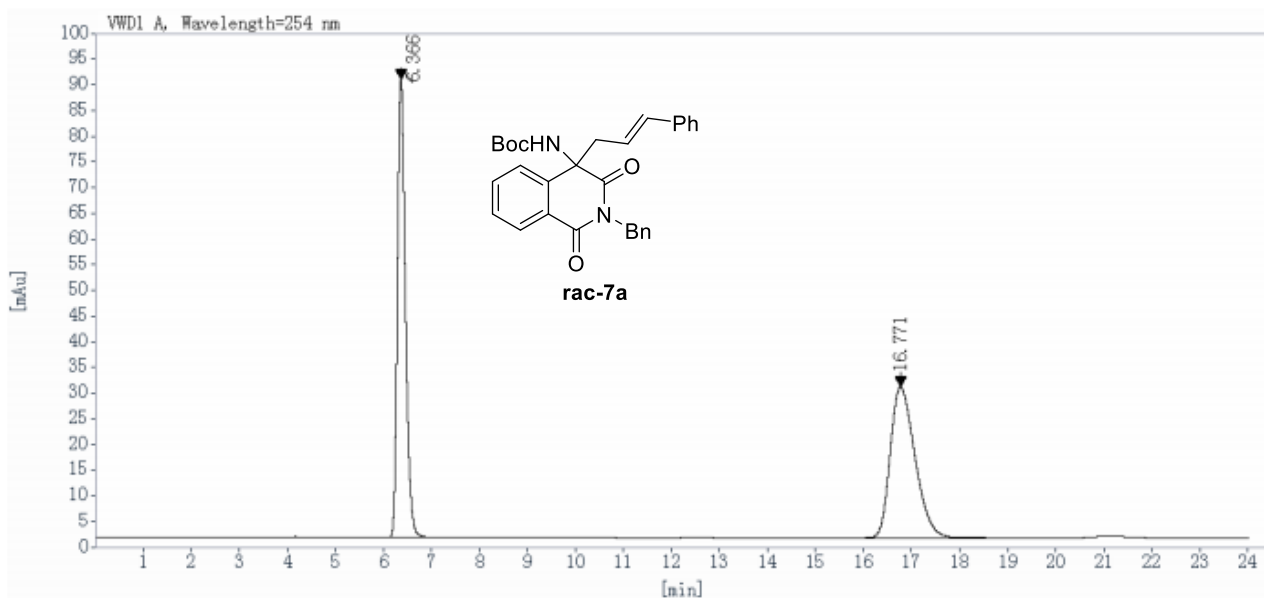

| Ret Time [min] | Peak Type | Width [min] | Height [mAU] | Area [mAU*s] | Area [%] |
|----------------|-----------|-------------|--------------|--------------|----------|
| 6.366          | BB        | 0.18        | 2541.4800    | 29407.3379   | 49.5486  |
| 16.771         | BBA       | 0.56        | 834.9534     | 29943.1660   | 50.4514  |
| Totals:        |           |             |              | 59350.5039   | 100.0000 |

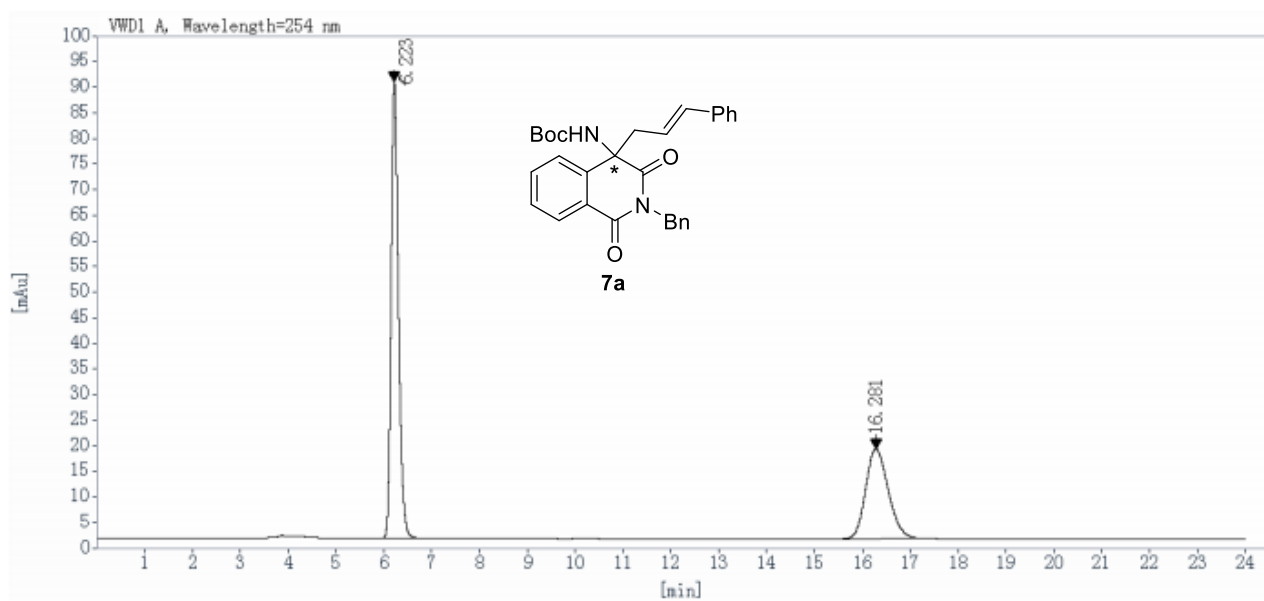

| Ret Time [min] | Peak Type | Width [min] | Height [mAU] | Area [mAU*s] | Area [%] |
|----------------|-----------|-------------|--------------|--------------|----------|
| 6.223          | BV R      | 0.16        | 1554.8115    | 16612.5664   | 62.4217  |
| 16.281         | BBA       | 0.51        | 305.9828     | 10000.8613   | 37.5783  |
| Totals:        |           |             |              | 26613.4277   | 100.0000 |

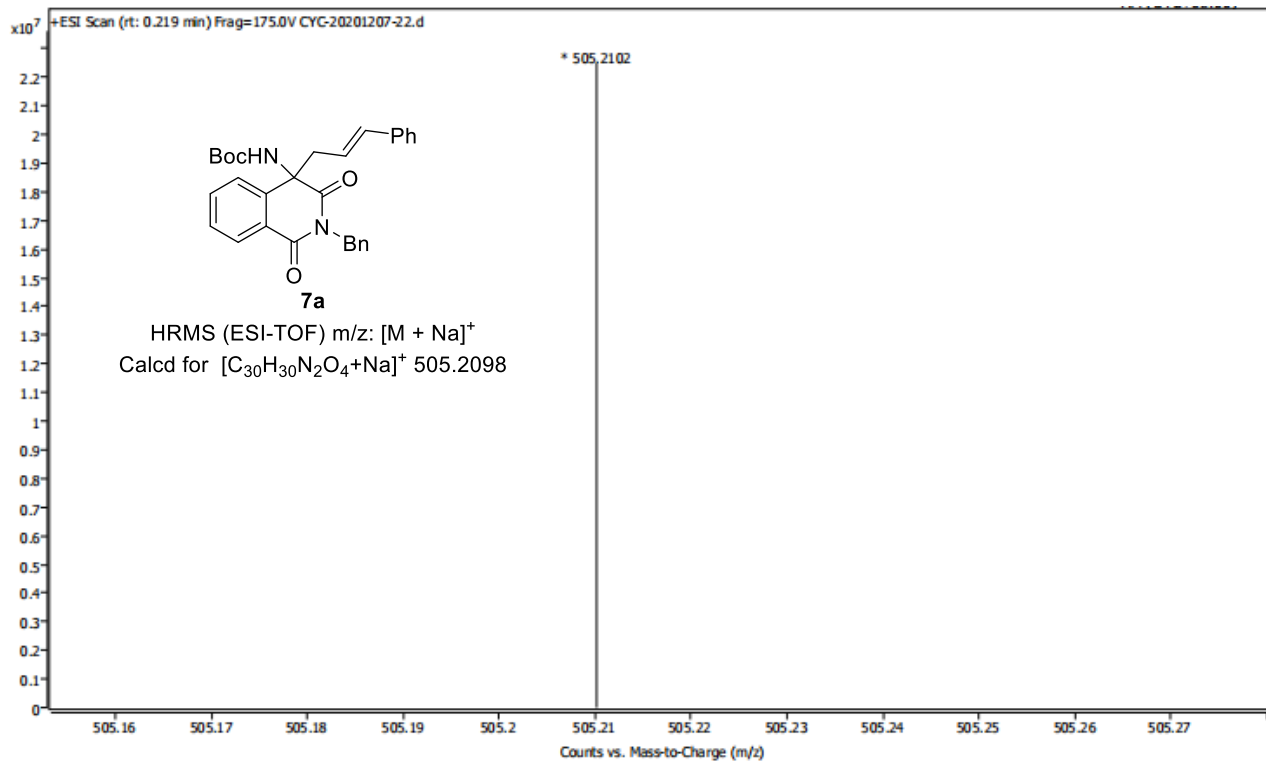

7.886  
7.879  
7.864  
7.857  
7.593  
7.581  
7.571  
7.559  
7.462  
7.450  
7.443  
7.376  
7.369  
7.356  
7.349  
7.335  
7.328  
7.268  
7.264  
7.257  
7.246  
7.242  
7.237  
7.233  
7.226  
7.221  
7.214  
7.209  
7.206  
7.197  
7.192  
7.180  
7.176  
7.041  
7.035  
7.030  
7.027  
7.021  
7.017  
6.181  
6.142  
5.545  
5.529  
5.509  
5.489  
5.469  
5.450  
5.231  
5.195  
5.151  
5.117  
2.756  
2.725  
2.702  
2.633  
2.616  
2.601  
2.583  
1.590  
1.352  
1.255  
0.880  
0.000

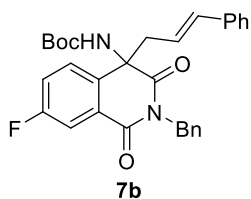

$^1\text{H NMR}$  (400 MHz,  $\text{CDCl}_3$ )

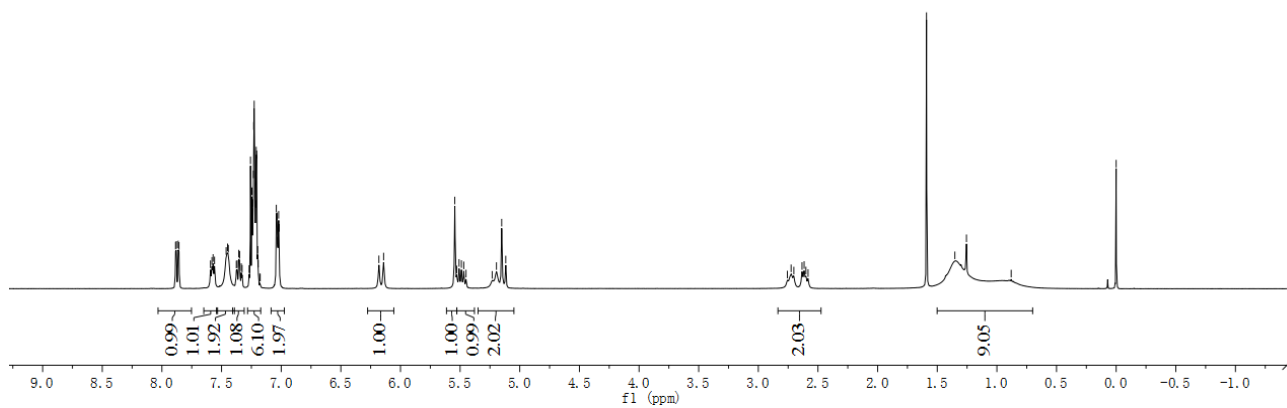

173.369  
163.320  
162.673  
162.647  
160.852  
136.748  
136.612  
135.861  
129.012  
128.579  
128.430  
128.131  
127.588  
127.135  
127.059  
126.895  
126.822  
126.742  
126.670  
126.422  
121.633  
121.410  
119.250  
115.244  
115.016  
81.296  
77.353  
77.353  
77.035  
76.718  
61.437  
47.001  
44.169  
27.970

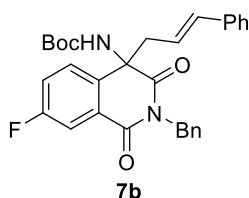

$^{13}\text{C NMR}$  (100 MHz,  $\text{CDCl}_3$ )

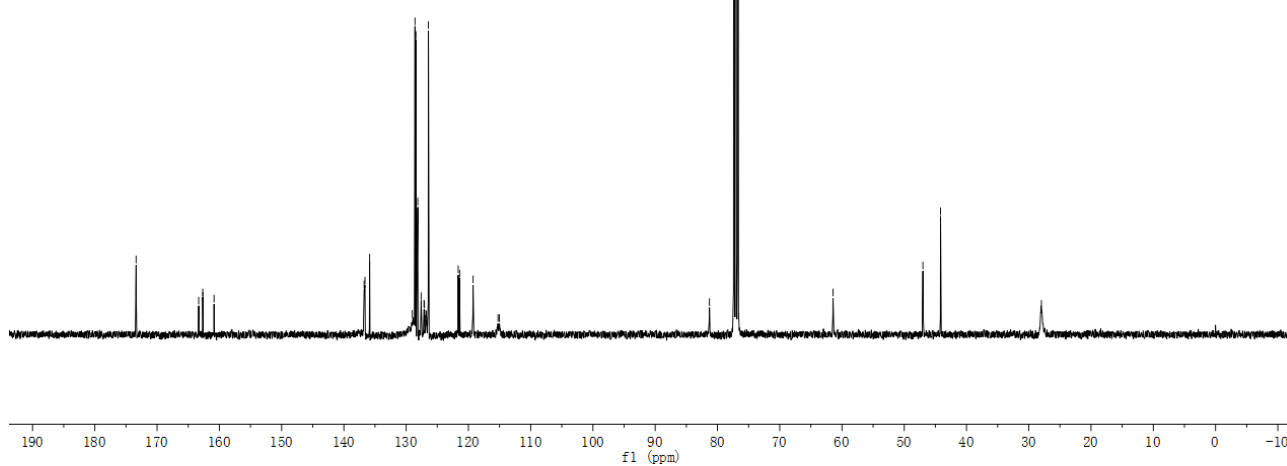

—112.897

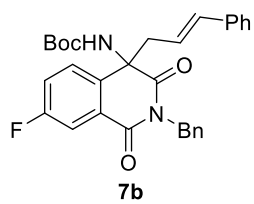

<sup>19</sup>F NMR (376 MHz, CDCl<sub>3</sub>)

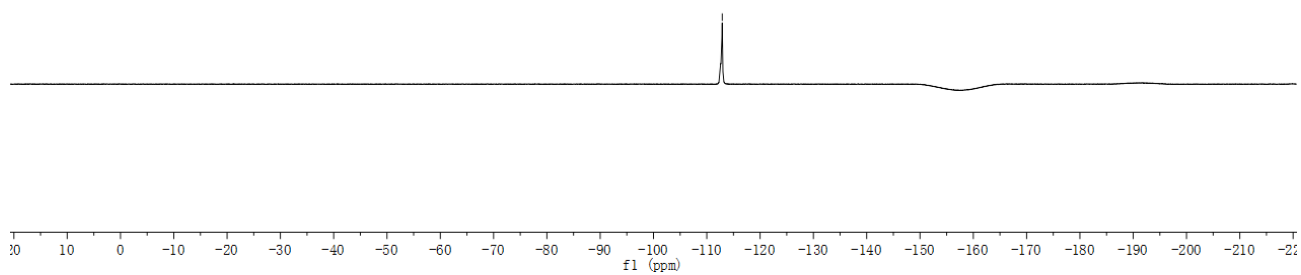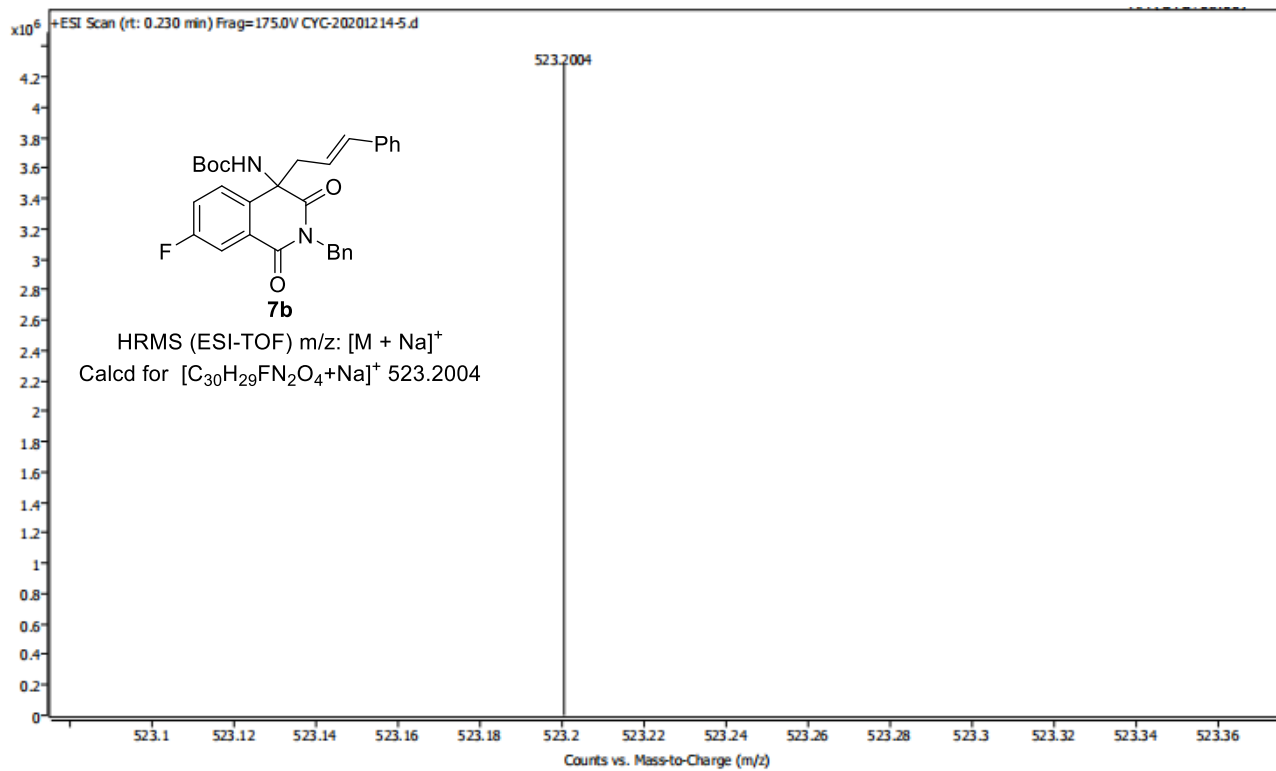

7.672  
7.666  
7.484  
7.463  
7.257  
7.240  
7.235  
7.227  
7.221  
7.212  
7.201  
7.196  
7.191  
7.054  
7.048  
7.034  
6.889  
6.167  
5.562  
5.543  
5.532  
5.524  
5.504  
5.485  
5.232  
5.195  
5.157  
5.123

—3.871

2.760  
2.739  
2.727  
2.707  
2.642  
2.625  
2.610  
2.592

1.611  
1.606

1.321

—0.941

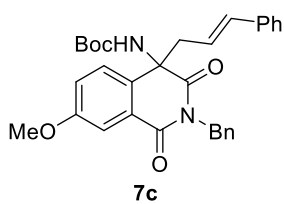

<sup>1</sup>H NMR (400 MHz, CDCl<sub>3</sub>)

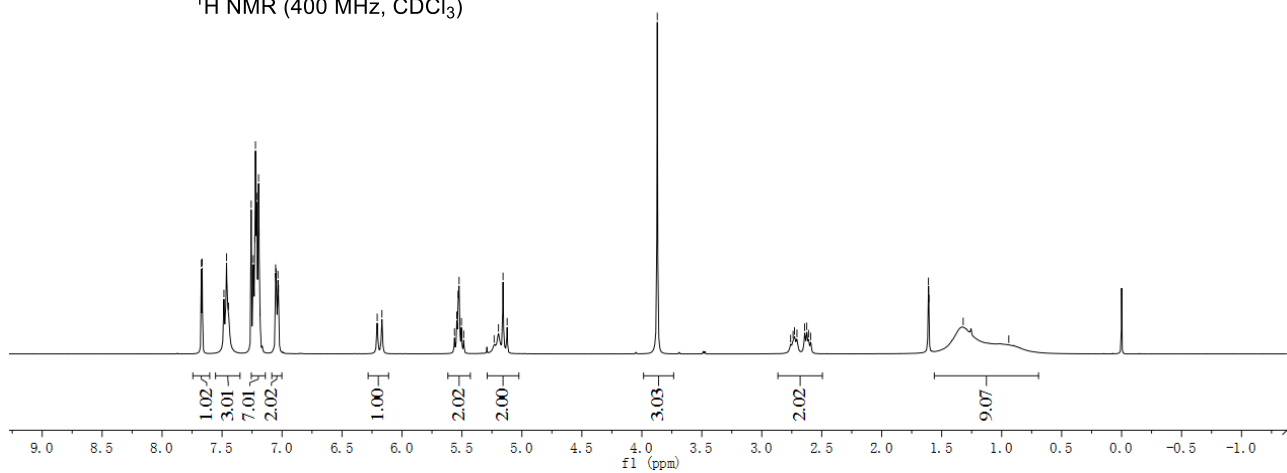

173.813  
163.661  
159.186  
136.853  
136.331  
136.056  
134.058  
129.121  
128.513  
128.359  
127.951  
127.426  
126.401  
126.122  
125.996  
122.264  
119.788  
110.985

80.968  
77.348  
77.031  
76.713

61.263

55.616

47.036

44.060

27.946

—0.000

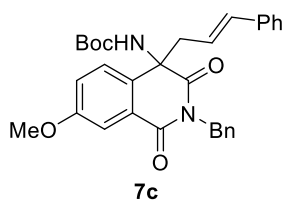

<sup>13</sup>C NMR (100 MHz, CDCl<sub>3</sub>)

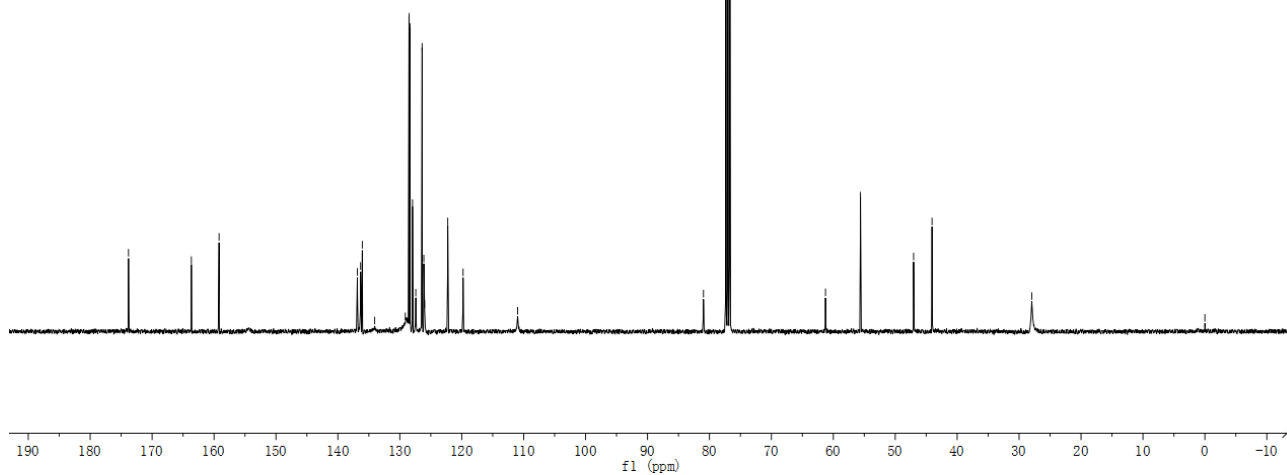

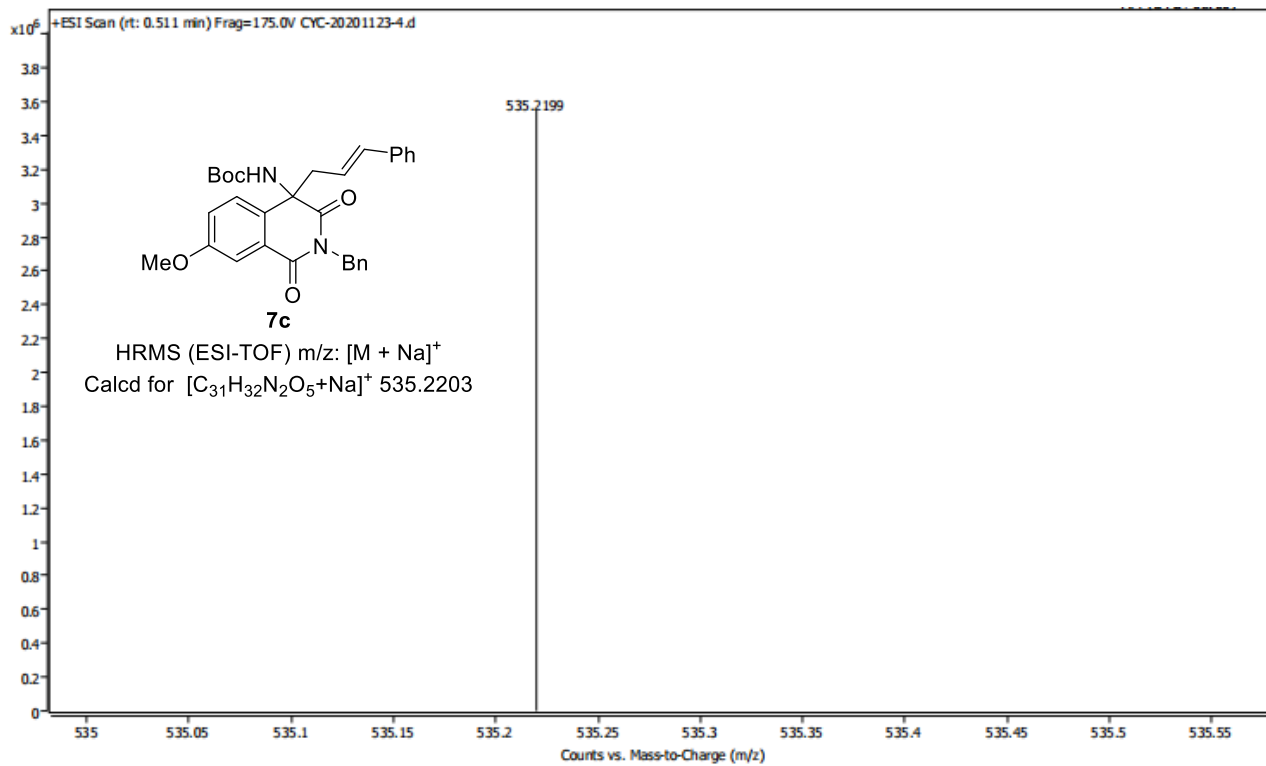

8.269  
8.267  
8.249  
8.247  
7.727  
7.724  
7.709  
7.706  
7.689  
7.669  
7.538  
7.535  
7.518  
7.501  
7.498  
7.444  
7.437  
7.423  
7.420  
7.414  
7.406  
7.402  
7.397  
7.385  
7.310  
7.305  
7.301  
7.294  
7.289  
7.284  
7.270  
7.260  
7.256  
7.252  
7.239  
7.235  
7.230  
7.224  
7.220  
7.215  
7.211  
7.101  
7.086  
6.459  
6.420  
5.767  
5.760  
5.744  
5.727  
5.721  
5.705  
5.687  
5.664  
2.935  
2.912  
2.902  
2.880  
2.850  
2.834  
2.818  
1.618  
1.607  
1.299  
1.256  
-0.000

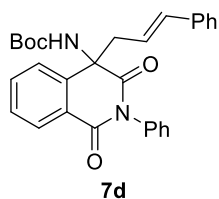

$^1\text{H NMR}$  (400 MHz,  $\text{CDCl}_3$ )

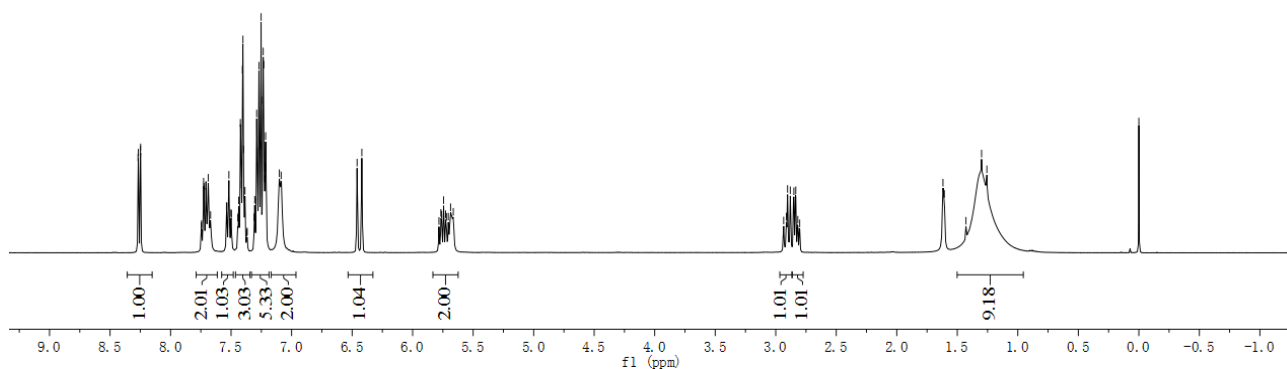

173.437  
163.879  
136.763  
135.247  
134.305  
129.222  
129.114  
128.754  
128.611  
128.451  
128.219  
128.196  
126.449  
125.362  
124.711  
119.843  
81.131  
77.370  
77.053  
76.735  
62.055  
47.101  
28.127

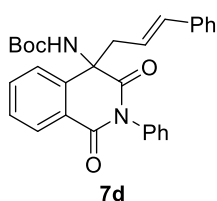

$^{13}\text{C NMR}$  (100 MHz,  $\text{CDCl}_3$ )

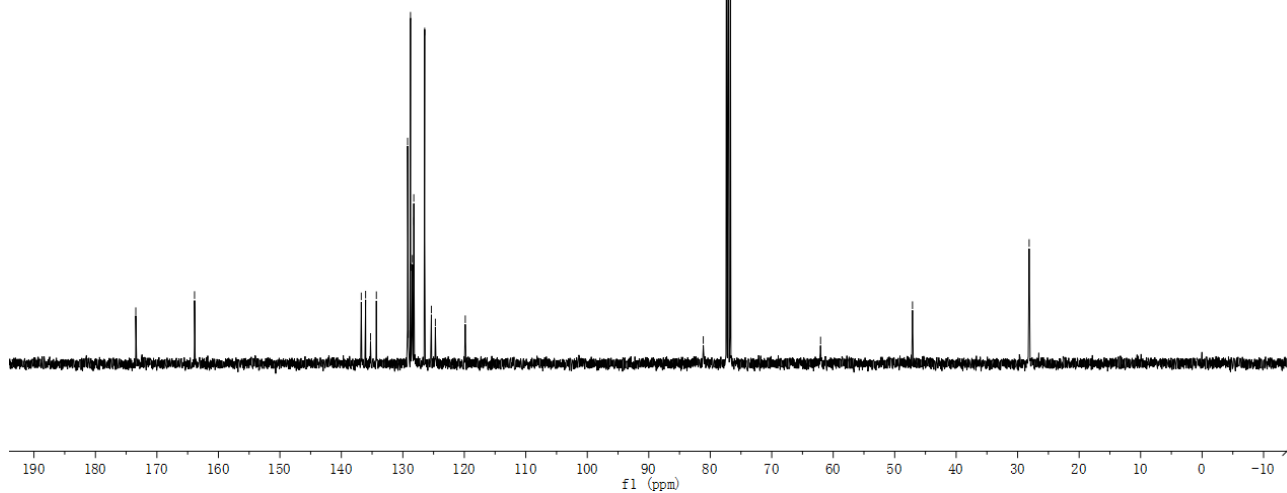



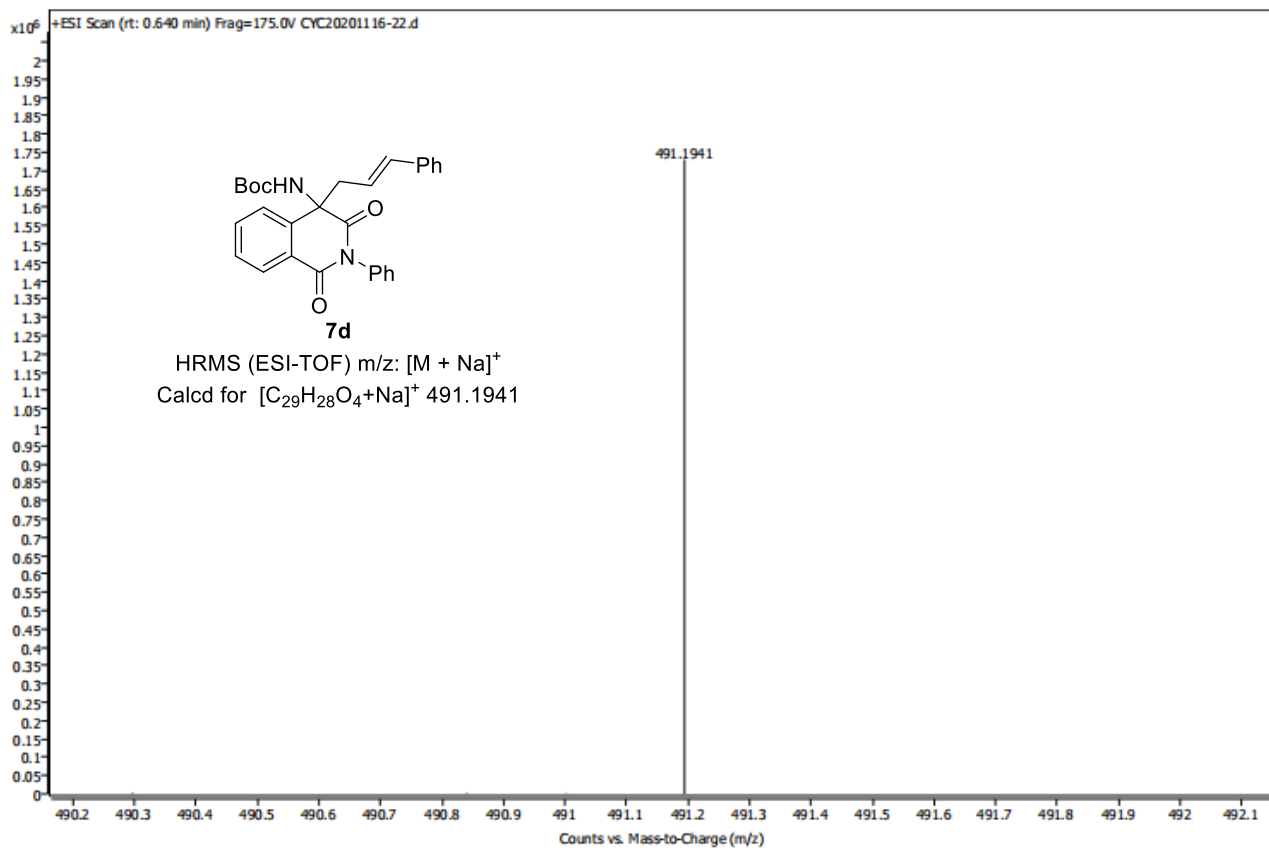

8.229  
8.209  
7.673  
7.654  
7.637  
7.634  
7.607  
7.587  
7.476  
7.457  
7.439  
7.252  
7.207  
7.198  
7.194  
7.185  
7.172  
7.167  
7.158  
7.154  
7.143  
7.139  
7.123  
7.107  
7.103  
7.088  
7.067  
7.049  
6.994  
6.977  
6.973  
6.955  
6.316  
5.617  
5.424  
5.405  
5.386  
5.366  
5.347  
5.247  
5.212  
5.152  
5.118  
2.772  
2.745  
2.681  
2.662  
2.648  
2.630  
2.111  
1.628  
1.341  
1.0899  
0.000

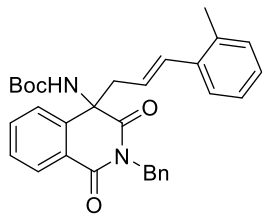

**7e**

$^1\text{H NMR}$  (400 MHz,  $\text{CDCl}_3$ )

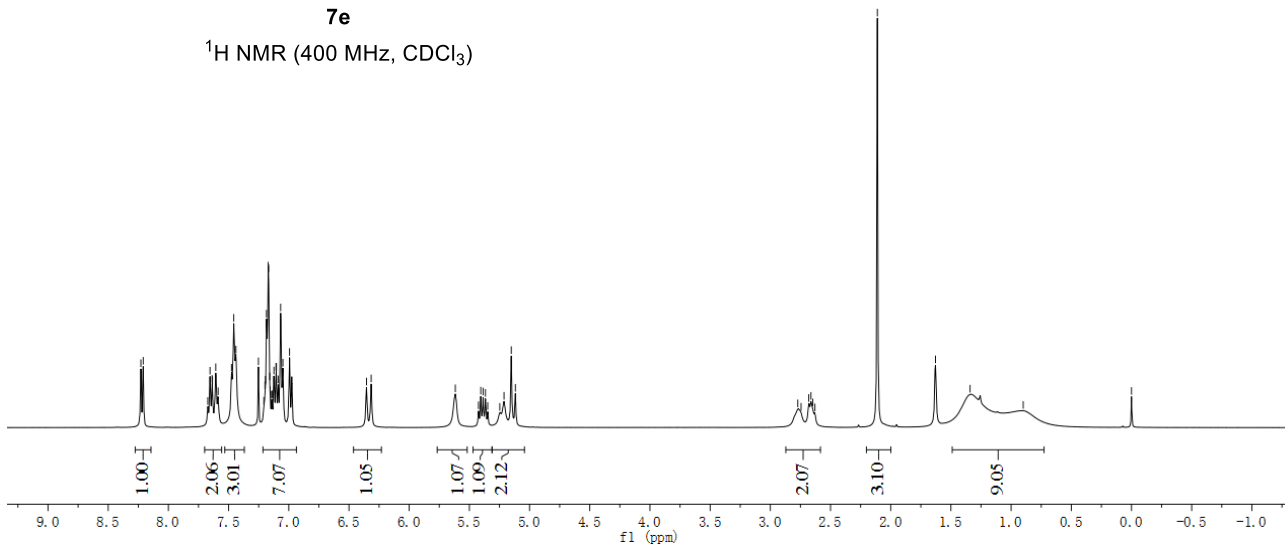

173.684  
163.736  
136.820  
135.274  
135.251  
134.618  
133.990  
130.166  
128.925  
128.341  
128.033  
127.902  
127.442  
126.164  
125.849  
125.223  
124.550  
120.962  
81.081  
77.378  
77.061  
76.744  
61.723  
47.284  
44.000  
27.941  
19.628

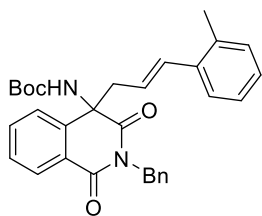

**7e**

$^{13}\text{C NMR}$  (100 MHz,  $\text{CDCl}_3$ )

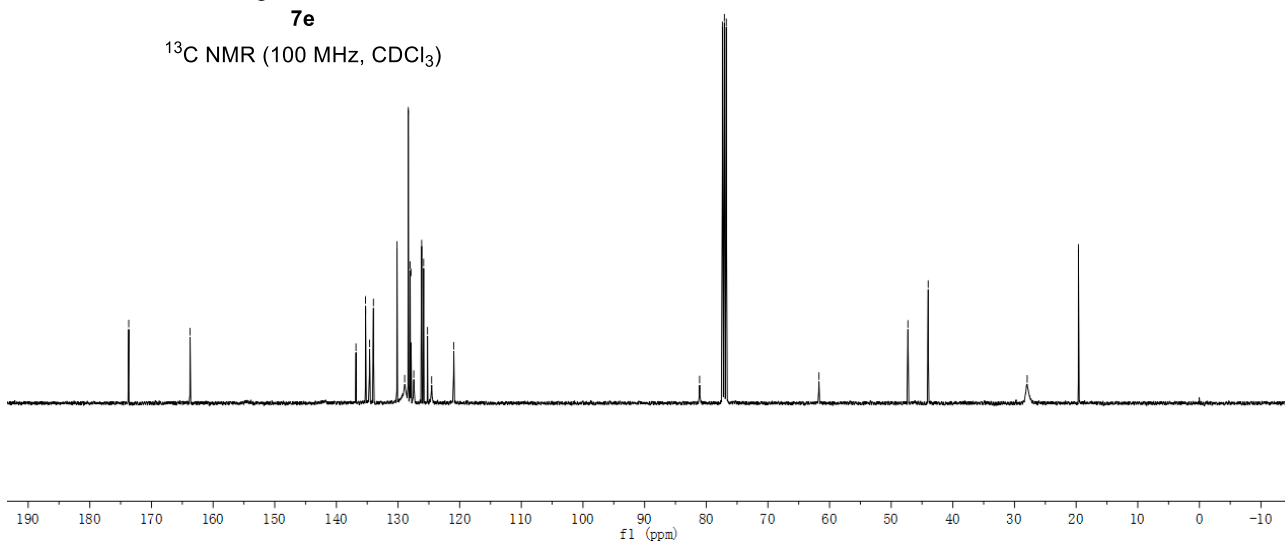

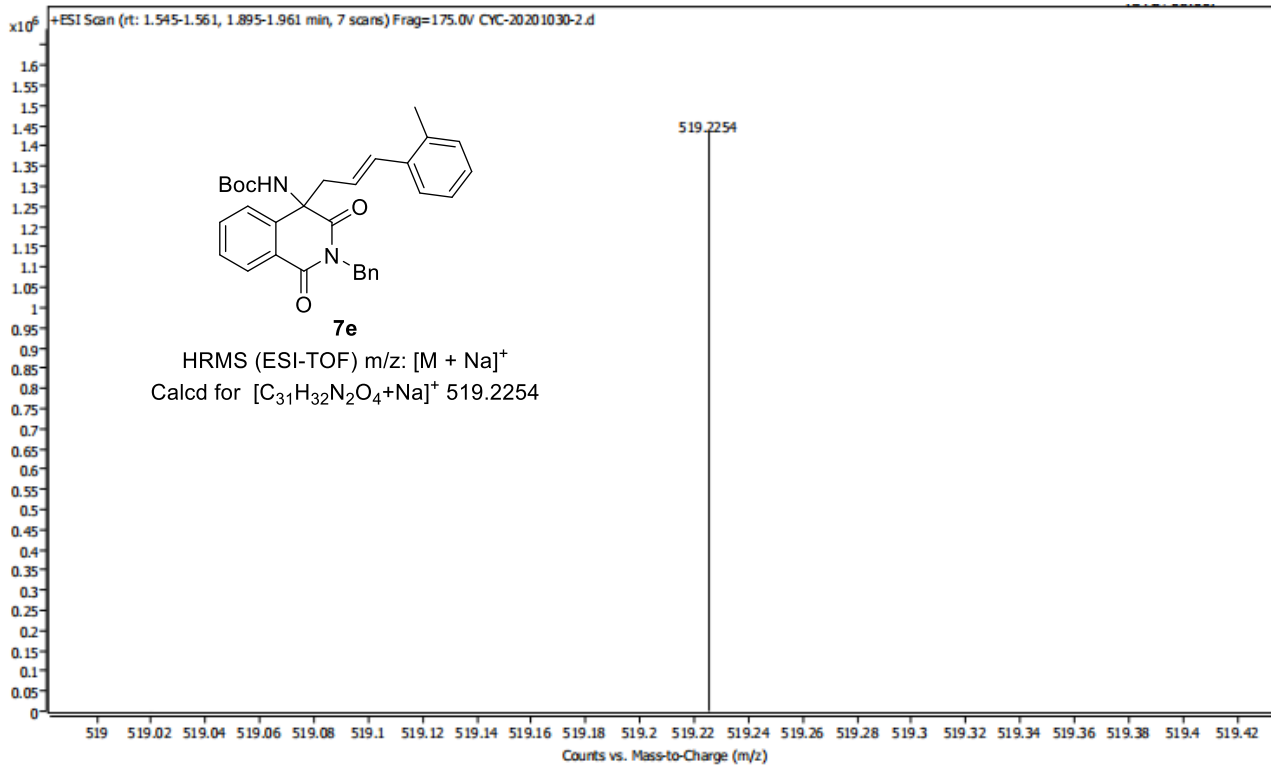

8.223  
8.221  
8.204  
8.201  
7.672  
7.669  
7.653  
7.649  
7.635  
7.631  
7.593  
7.573  
7.479  
7.478  
7.462  
7.459  
7.444  
7.441  
7.254  
7.244  
7.240  
7.237  
7.233  
7.230  
7.222  
7.218  
7.214  
7.208  
7.203  
7.198  
7.195  
7.188  
7.186  
7.151  
7.132  
7.113  
7.041  
7.023  
6.894  
6.889  
6.884  
6.874  
6.869  
6.858  
6.854  
6.850  
6.183  
6.143  
5.557  
5.536  
5.517  
5.214  
5.497  
5.160  
5.126  
2.709  
2.648  
2.630  
2.302  
1.613  
1.335  
1.255  
0.895  
0.000

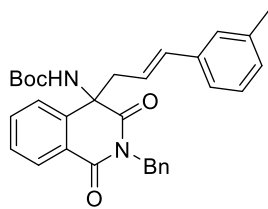

**7f**

<sup>1</sup>H NMR (400 MHz, CDCl<sub>3</sub>)

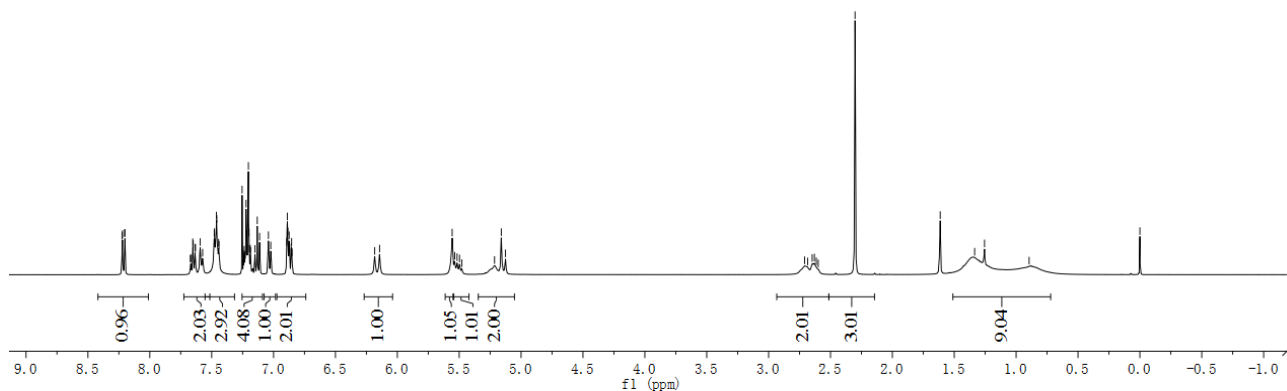

173.586  
163.691  
138.074  
136.897  
136.631  
135.951  
133.941  
128.819  
128.432  
128.361  
127.996  
127.426  
127.194  
125.077  
124.489  
123.533  
119.410  
81.039  
77.345  
77.028  
76.710  
61.698  
47.046  
43.995  
27.912  
21.335  
0.000

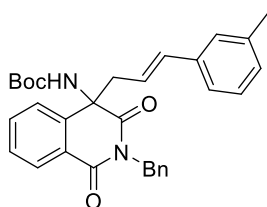

**7f**

<sup>13</sup>C NMR (100 MHz, CDCl<sub>3</sub>)

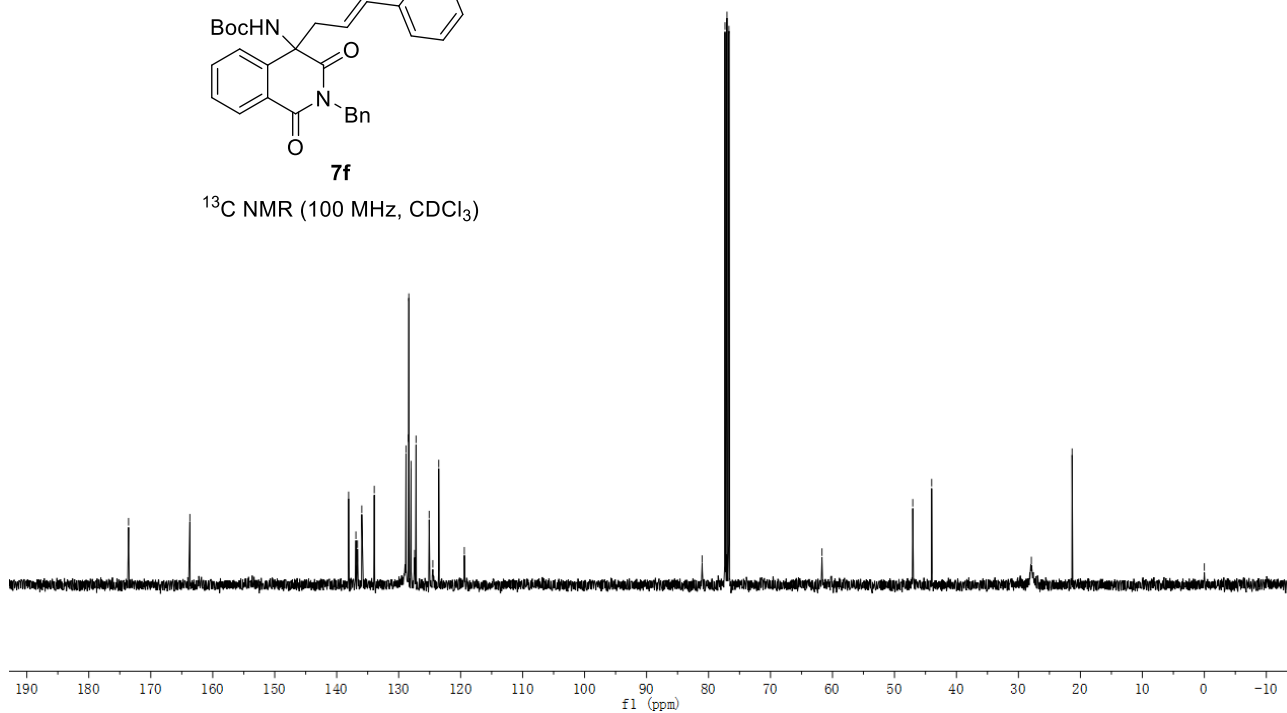

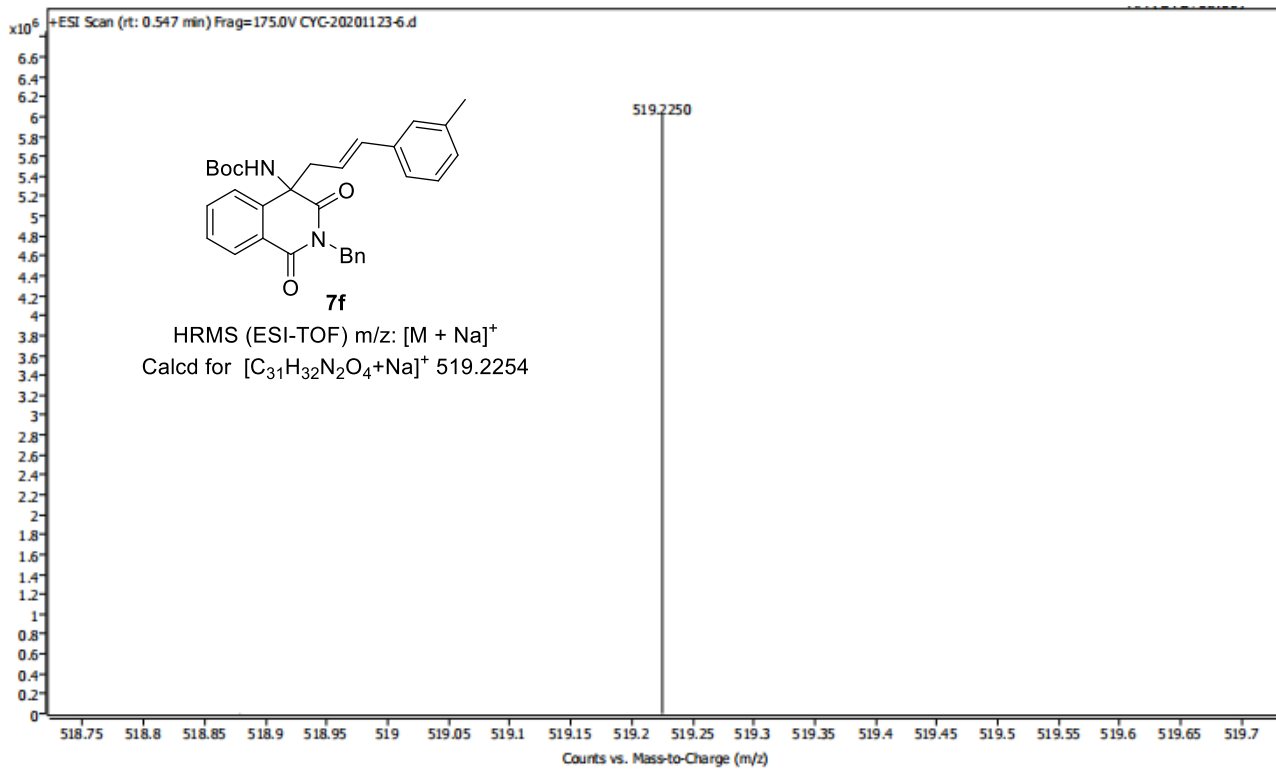

8.209  
8.191  
7.663  
7.645  
7.627  
7.585  
7.566  
7.472  
7.471  
7.453  
7.435  
7.432  
7.255  
7.244  
7.229  
7.215  
7.210  
7.204  
7.194  
7.054  
7.035  
6.954  
6.934  
6.160  
6.121  
5.540  
5.507  
5.488  
5.468  
5.449  
5.430  
5.202  
5.238  
5.157  
5.123  
2.707  
2.685  
2.636  
2.618  
2.602  
2.585  
2.311  
1.604  
1.344  
-0.895  
-0.000

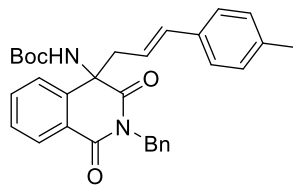

**7g**

$^1\text{H NMR}$  (400 MHz,  $\text{CDCl}_3$ )

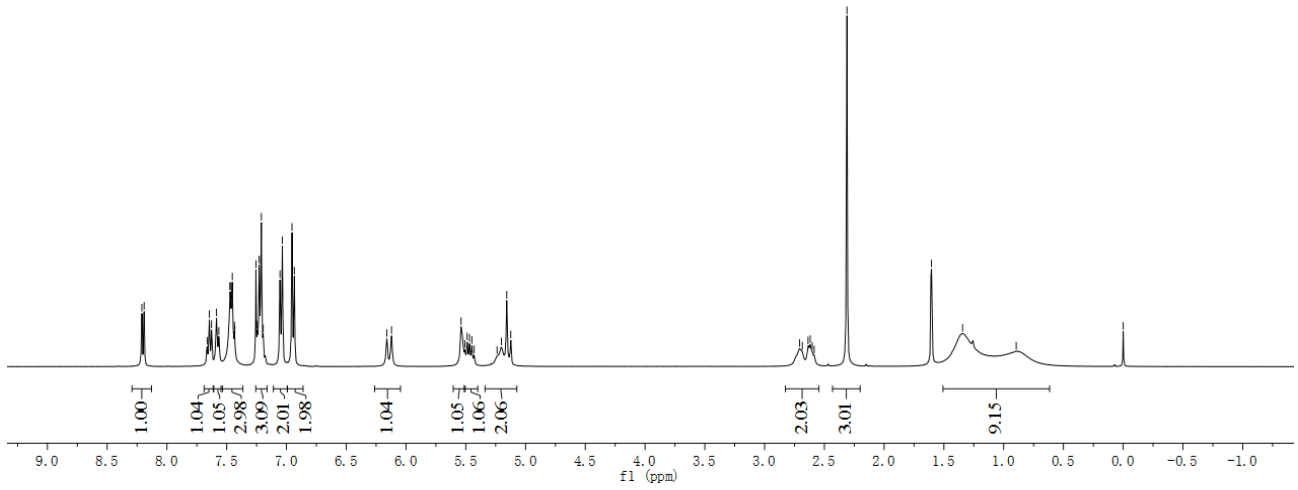

173.640  
163.704  
137.942  
136.923  
136.379  
133.948  
133.256  
129.236  
128.965  
128.809  
128.387  
127.996  
127.461  
126.344  
125.126  
124.467  
118.537  
81.047  
77.365  
77.046  
76.729  
61.763  
47.079  
43.985  
27.907  
21.225

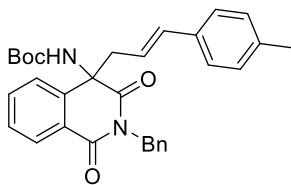

**7g**

$^{13}\text{C NMR}$  (100 MHz,  $\text{CDCl}_3$ )

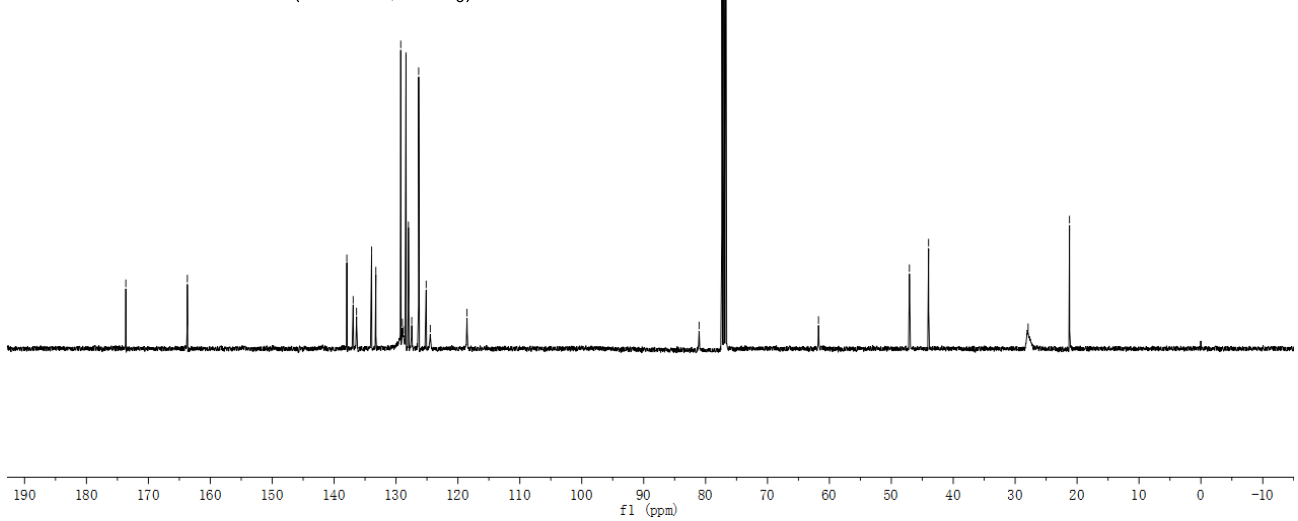

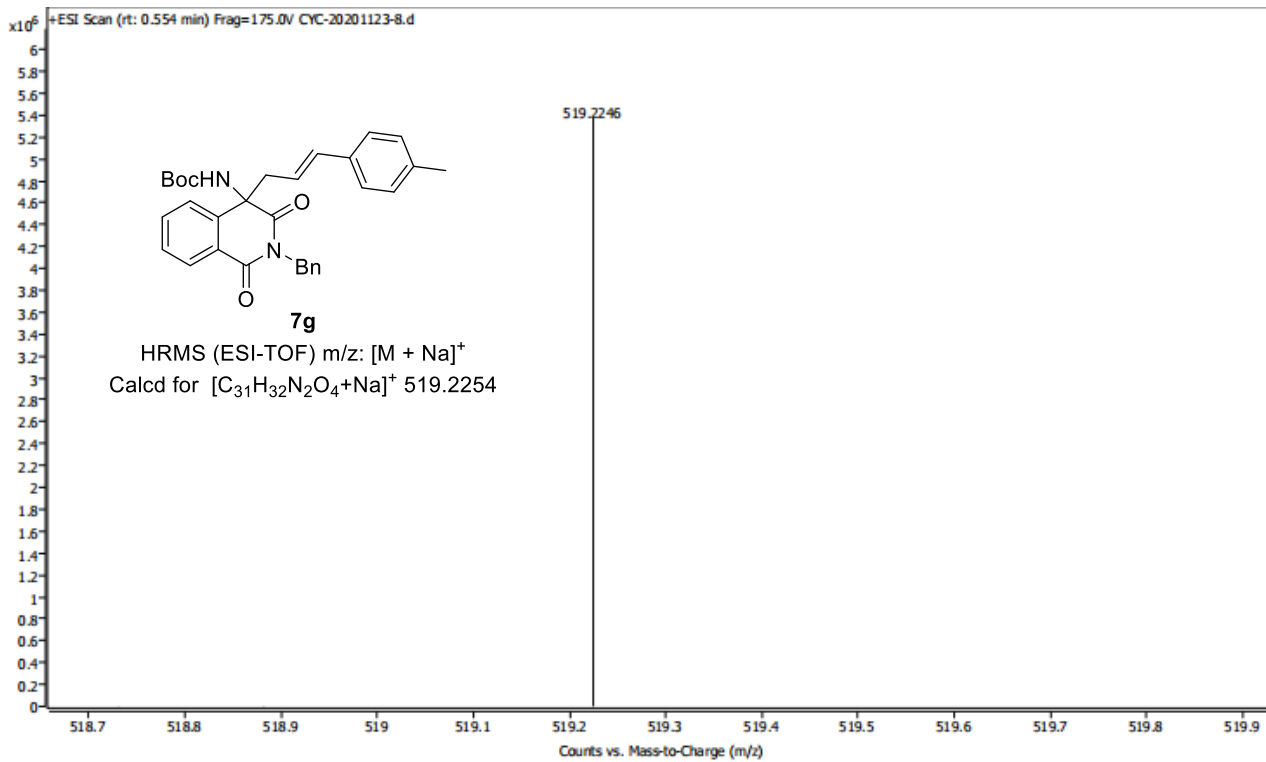

8.227  
8.223  
8.207  
8.203  
7.664  
7.645  
7.627  
7.598  
7.578  
7.473  
7.470  
7.453  
7.451  
7.436  
7.432  
7.255  
7.218  
7.213  
7.207  
7.200  
7.196  
7.191  
7.186  
7.179  
7.173  
7.164  
7.153  
7.151  
7.038  
7.034  
7.019  
7.014  
6.860  
6.841  
6.822  
6.810  
6.790  
6.557  
6.517  
5.593  
5.573  
5.555  
5.535  
5.516  
5.197  
5.162  
5.128  
3.753  
2.731  
2.676  
2.658  
2.643  
2.627  
2.626  
1.627  
1.359  
1.255  
0.862  
0.000

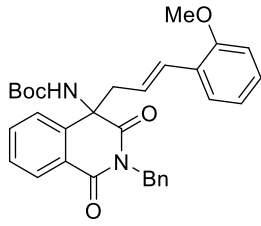

**7h**

<sup>1</sup>H NMR (400 MHz, CDCl<sub>3</sub>)

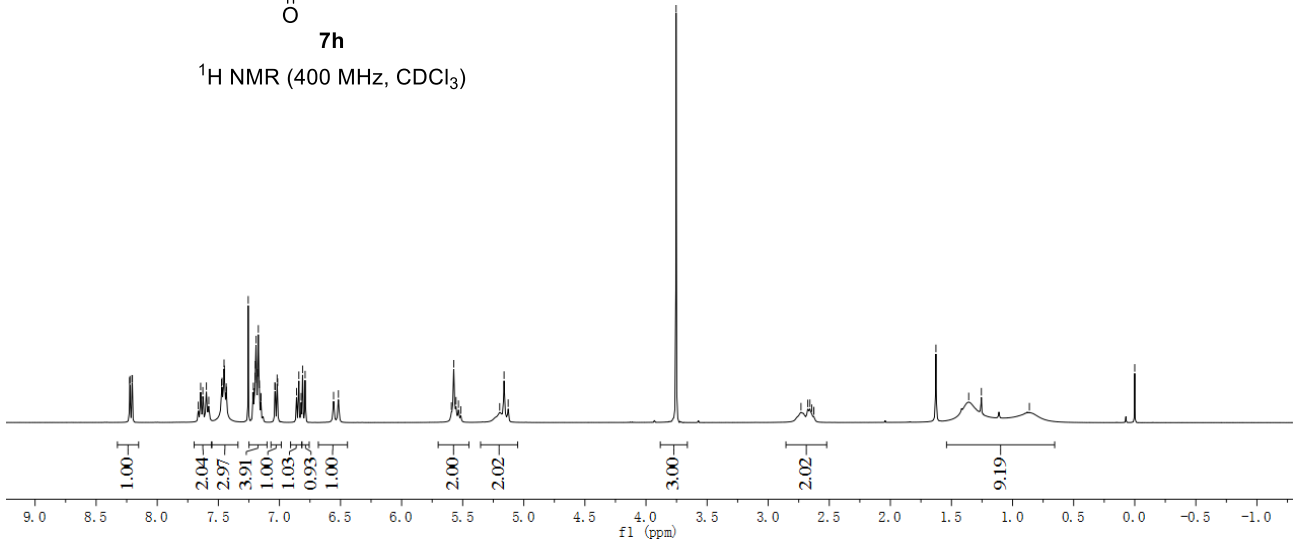

173.698  
163.762  
156.593  
136.911  
133.913  
131.516  
129.035  
128.301  
127.931  
127.361  
127.176  
125.218  
125.145  
124.538  
120.636  
120.514  
110.739  
80.969  
77.364  
77.046  
76.729  
61.766  
55.317  
47.473  
44.024  
28.168

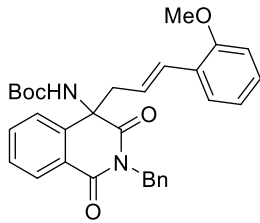

**7h**

<sup>13</sup>C NMR (100 MHz, CDCl<sub>3</sub>)

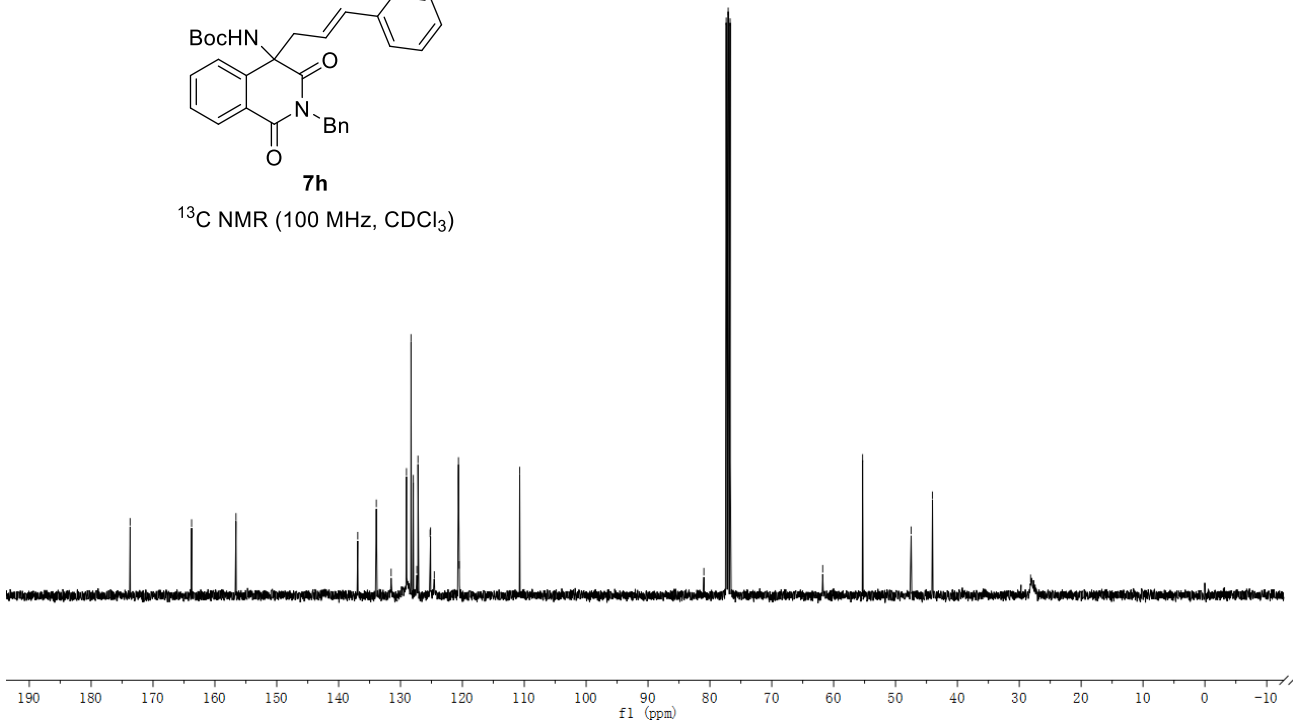



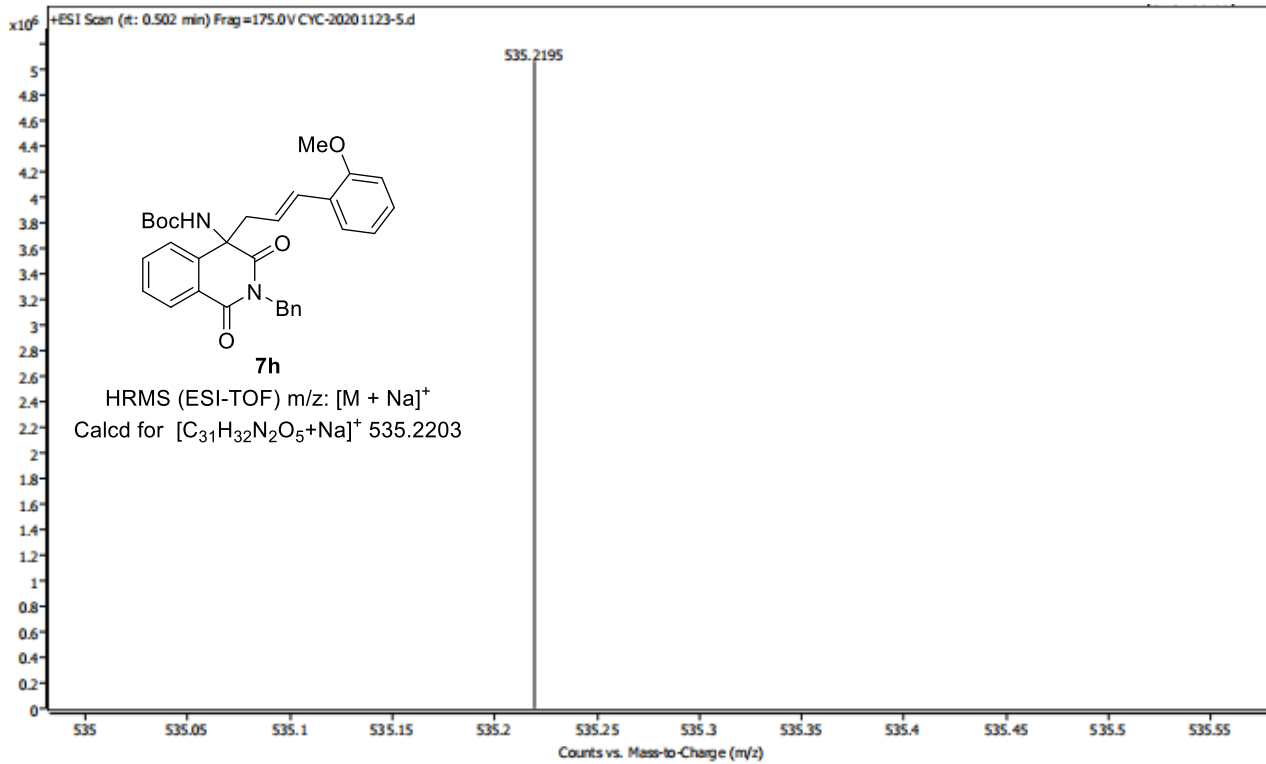



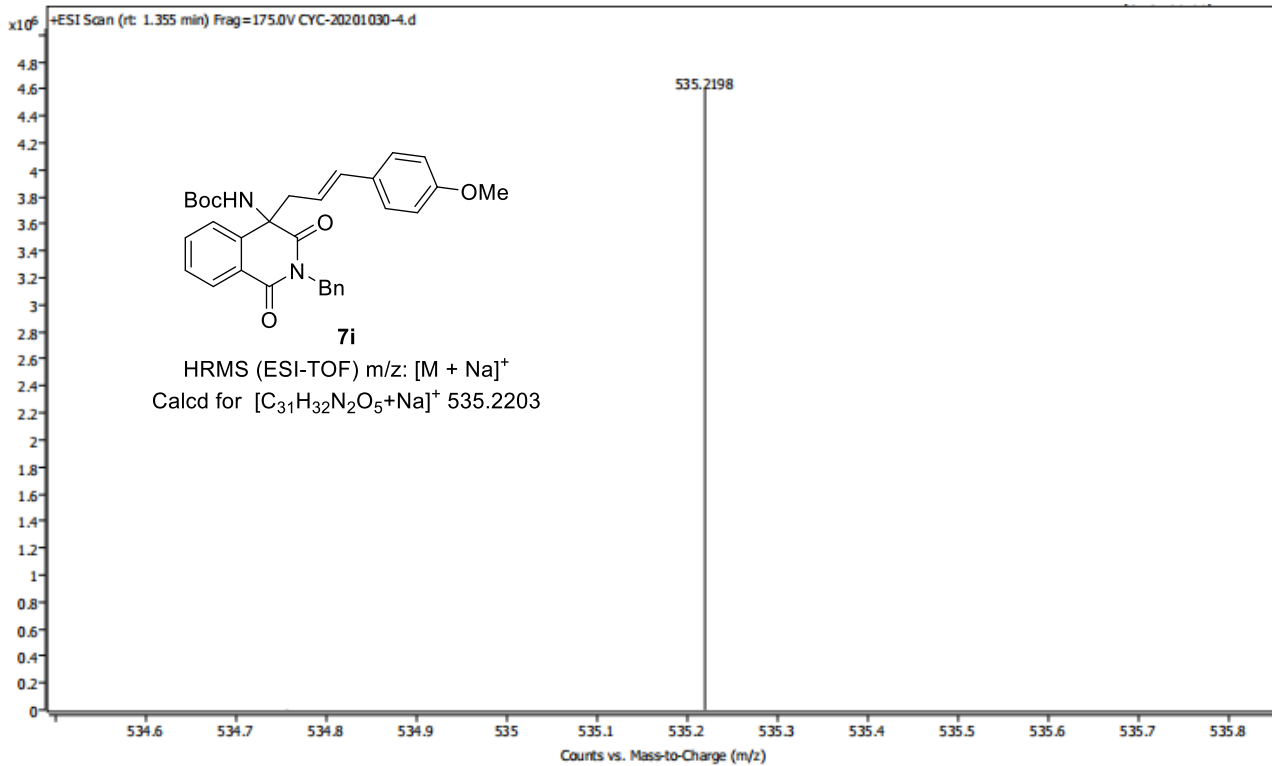

8.218  
8.216  
8.198  
8.196  
7.679  
7.675  
7.659  
7.655  
7.641  
7.638  
7.607  
7.587  
7.483  
7.480  
7.463  
7.445  
7.442  
7.260  
7.235  
7.231  
7.226  
7.221  
7.213  
7.210  
7.203  
7.197  
7.194  
7.185  
7.180  
7.180  
6.964  
6.958  
6.949  
6.941  
6.927  
6.919  
6.913  
6.903  
6.898  
6.892  
6.881  
6.876  
6.089  
6.051  
5.428  
5.409  
5.390  
5.370  
5.350  
5.228  
5.192  
5.164  
5.130  
5.130  
2.760  
2.646  
2.625  
2.594  
1.733  
1.352  
1.256  
0.879

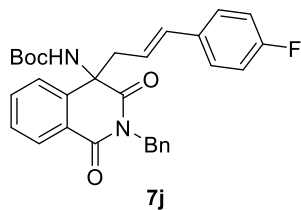

<sup>1</sup>H NMR (400 MHz, CDCl<sub>3</sub>)

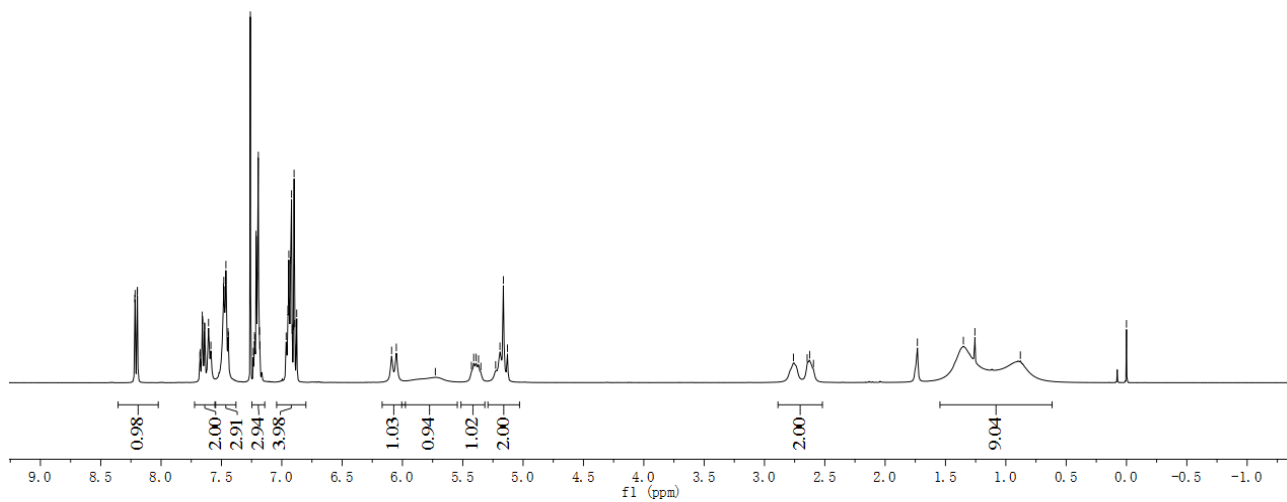

173.629  
163.706  
161.249  
136.887  
135.171  
134.037  
132.241  
132.208  
128.868  
128.365  
128.049  
127.988  
127.908  
127.497  
125.193  
124.478  
119.423  
119.401  
115.539  
115.324  
81.092  
77.388  
77.070  
76.752  
61.763  
46.918  
43.952  
27.927

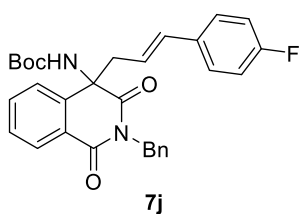

<sup>13</sup>C NMR (100 MHz, CDCl<sub>3</sub>)

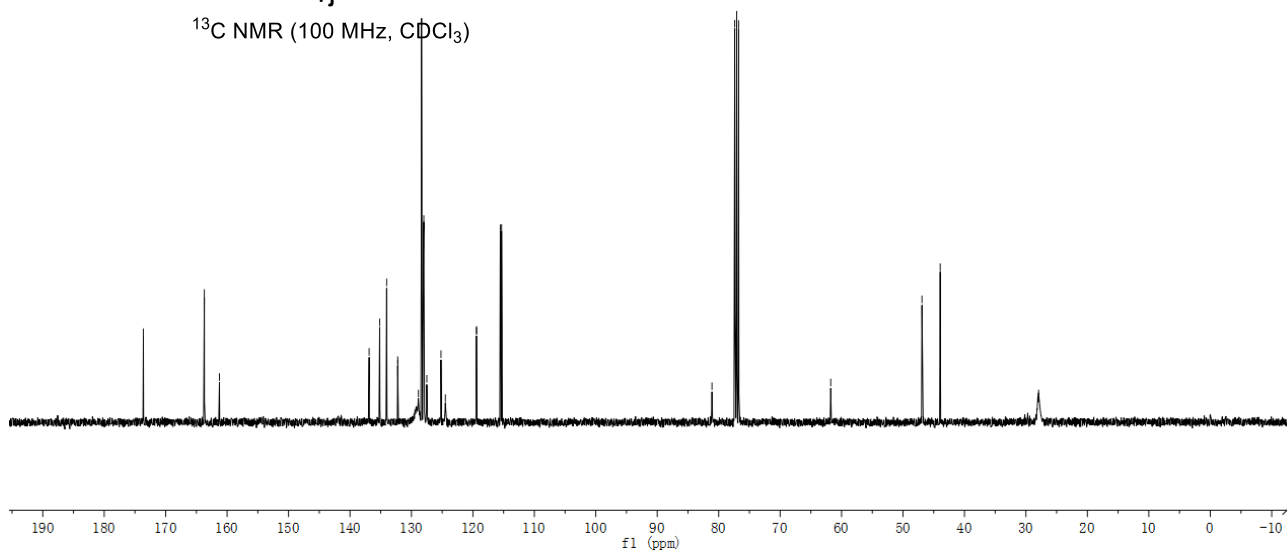

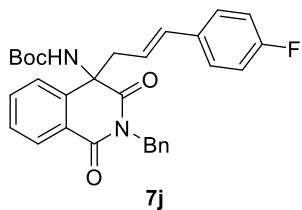

$^{19}\text{F}$  NMR (376 MHz,  $\text{CDCl}_3$ )

---113.709

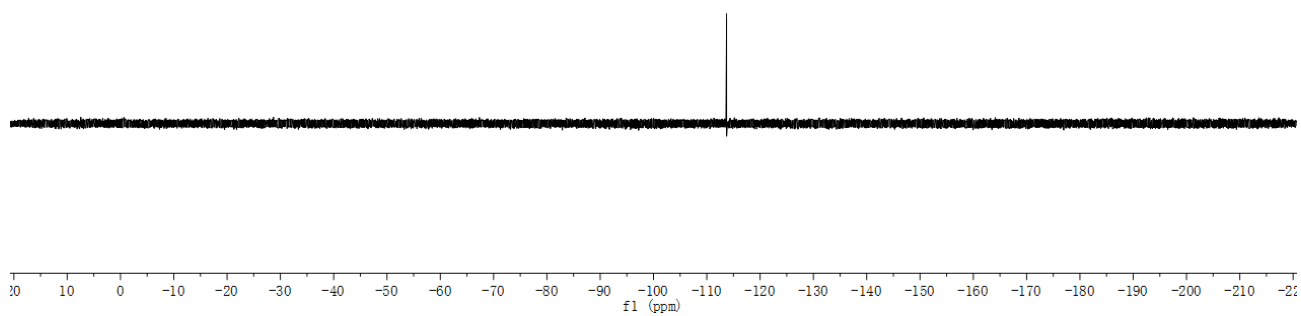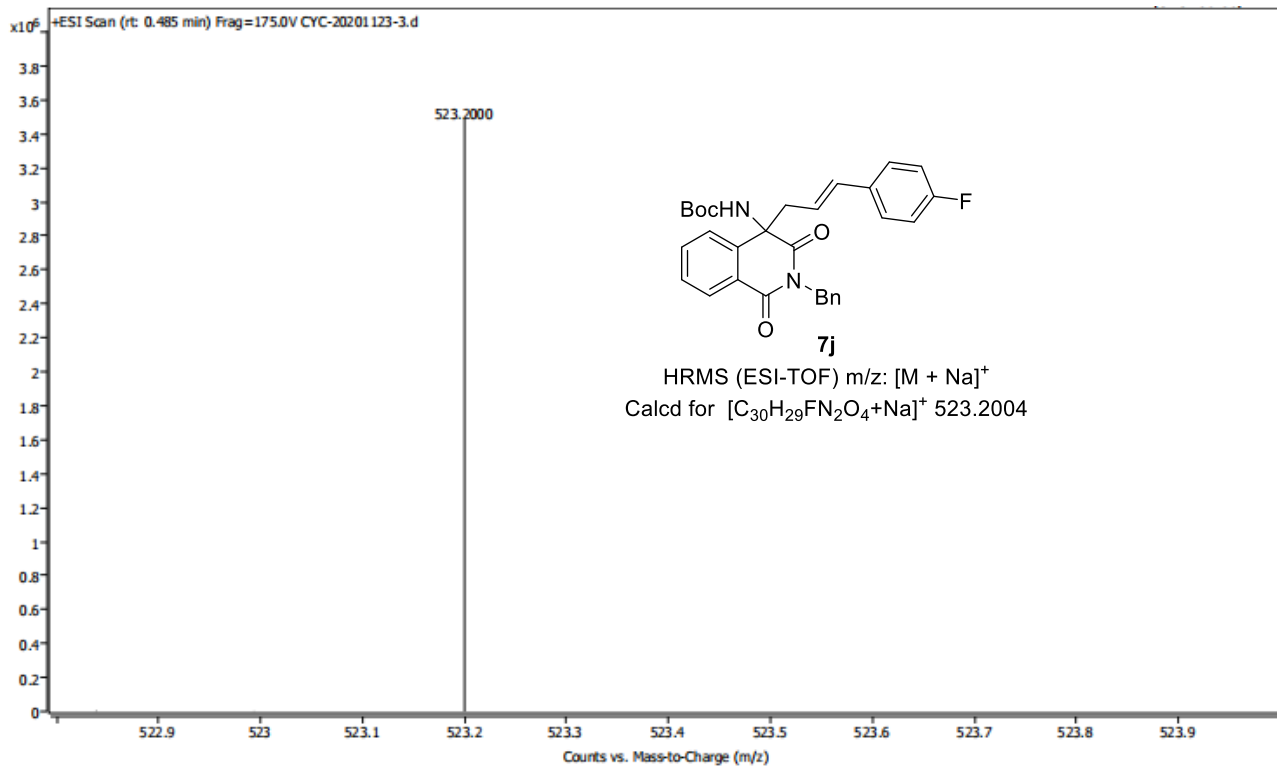

8.258  
8.239  
7.696  
7.678  
7.659  
7.613  
7.594  
7.512  
7.492  
7.473  
7.262  
7.172  
7.154  
7.135  
7.114  
7.096  
7.077  
6.004  
5.963  
5.795  
5.778  
5.774  
5.756  
5.737  
5.733  
5.717  
5.228  
5.194  
5.145  
5.111

2.821  
2.796  
2.725  
2.708  
2.692  
2.675

1.617  
1.336  
1.255

0.924

0.000

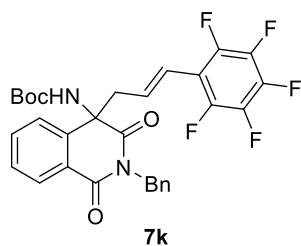

$^1\text{H NMR}$  (400 MHz,  $\text{CDCl}_3$ )

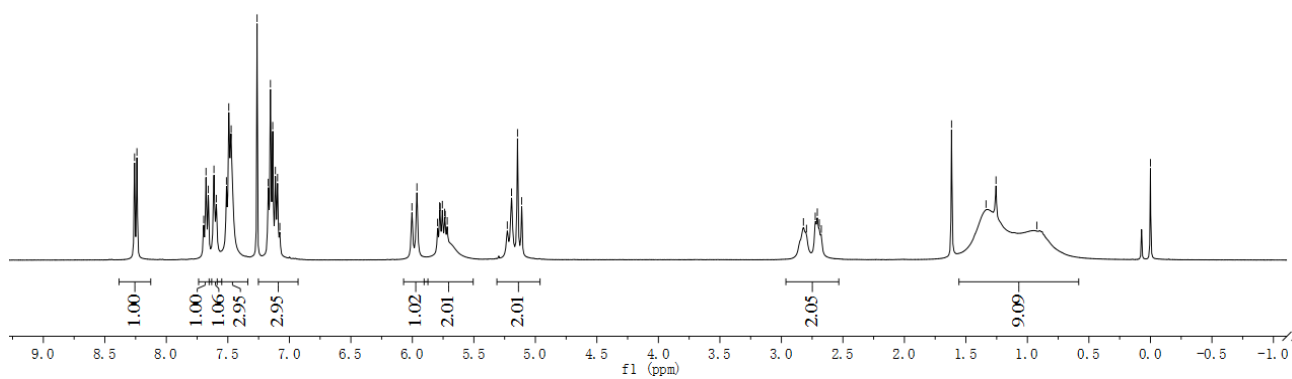

173.504  
163.478  
145.667  
143.202  
141.324  
138.914  
136.711  
136.454  
136.410  
136.346  
136.280  
136.253  
134.171  
129.785  
129.700  
129.631  
128.949  
128.290  
128.093  
127.314  
125.232  
124.534  
120.158  
110.866  
110.823  
110.682  
81.265  
77.362  
77.044  
76.726  
61.305  
47.703  
43.857  
27.862

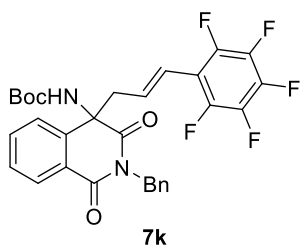

$^{13}\text{C NMR}$  (100 MHz,  $\text{CDCl}_3$ )

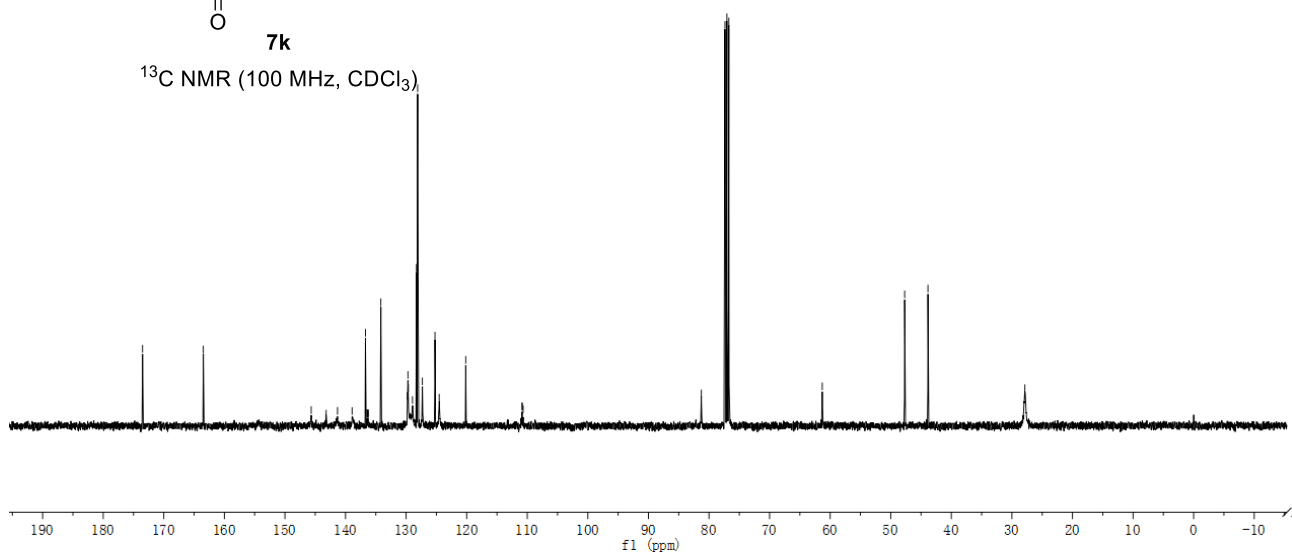

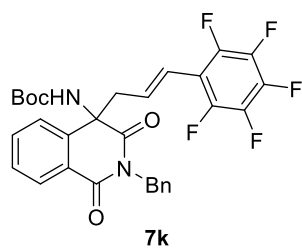

$^{19}\text{F}$  NMR (376 MHz,  $\text{CDCl}_3$ )

— -142.730  
 — -155.635  
 — -162.742

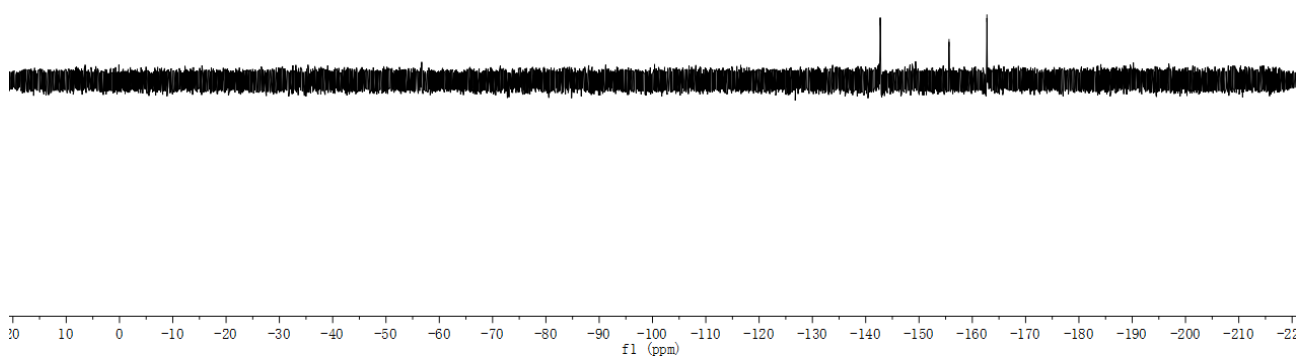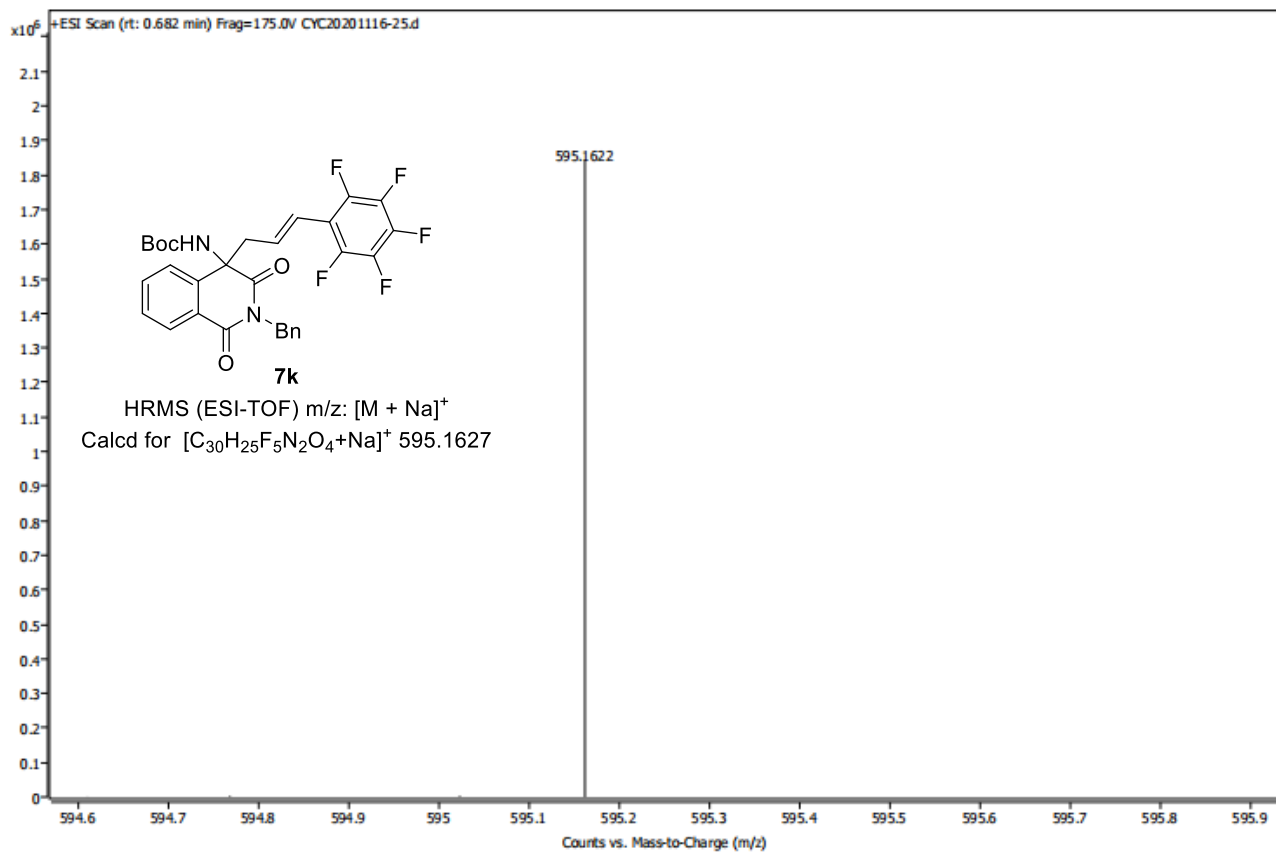

8.241  
8.221  
7.813  
7.794  
7.747  
7.726  
7.715  
7.696  
7.679  
7.660  
7.651  
7.631  
7.494  
7.474  
7.455  
7.441  
7.432  
7.425  
7.410  
7.363  
7.344  
7.324  
7.250  
7.136  
7.120  
7.103  
7.086  
7.069  
7.050  
7.050  
6.867  
6.829  
5.683  
5.558  
5.540  
5.520  
5.501  
5.482  
5.253  
5.218  
5.151  
5.116  
2.897  
2.873  
2.779  
2.761  
2.747  
2.728  
1.605  
1.339  
0.905  
0.000

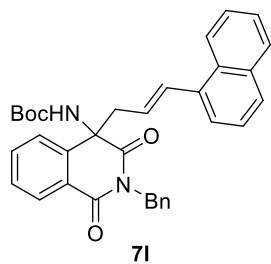

<sup>1</sup>H NMR (400 MHz, CDCl<sub>3</sub>)

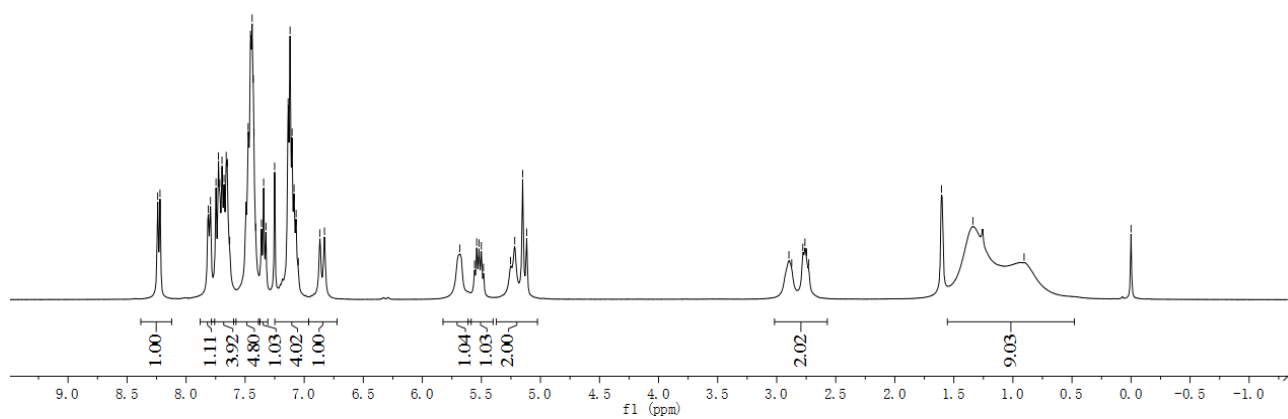

173.720  
163.694  
136.732  
134.060  
134.037  
133.728  
133.398  
130.796  
128.941  
128.477  
128.285  
128.052  
127.391  
126.025  
125.785  
125.578  
125.283  
124.559  
124.050  
123.482  
122.749  
81.108  
77.341  
77.023  
76.706  
61.801  
47.321  
44.000  
27.901  
0.000

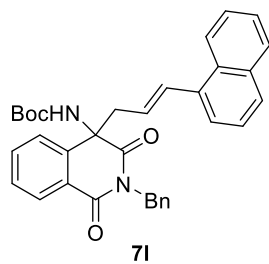

<sup>13</sup>C NMR (100 MHz, CDCl<sub>3</sub>)

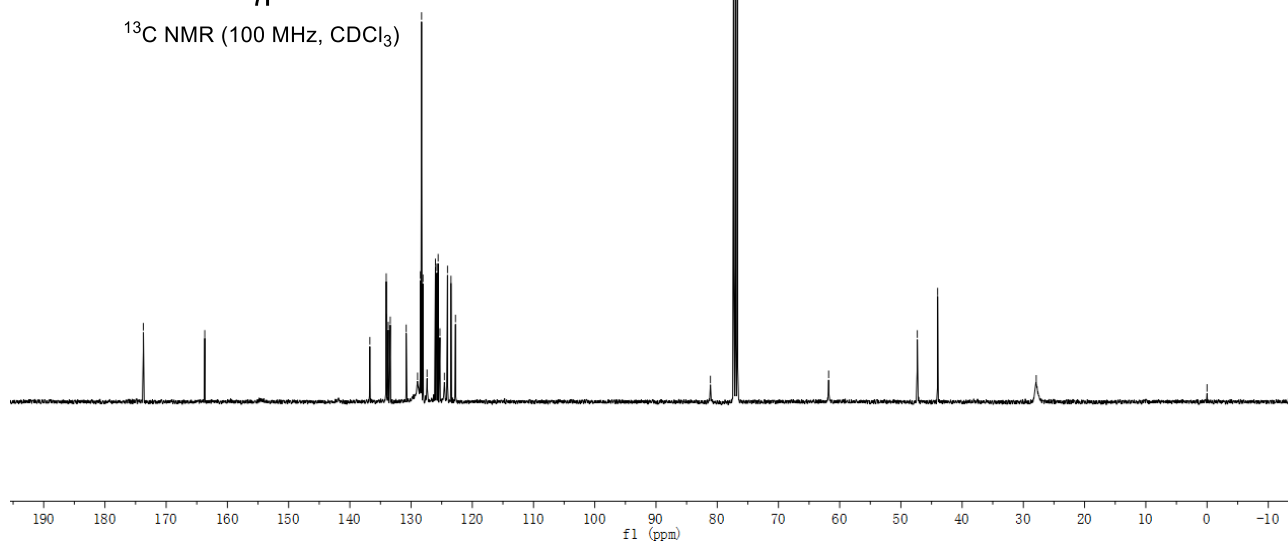



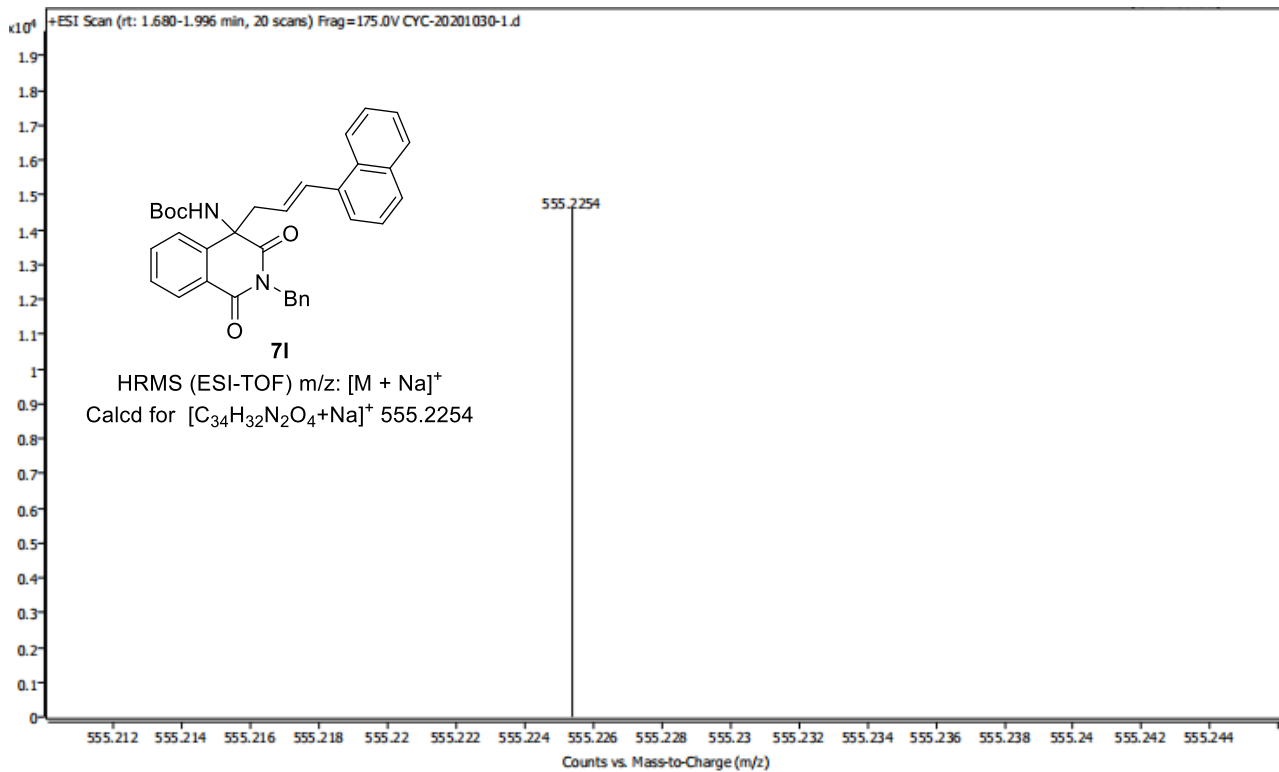

8.227  
8.208  
7.671  
7.652  
7.633  
7.582  
7.562  
7.484  
7.465  
7.446  
7.257  
7.242  
7.226  
7.206  
7.187  
7.169  
7.122  
7.110  
6.909  
6.899  
6.887  
6.749  
6.740  
6.319  
6.281  
5.618  
5.418  
5.399  
5.380  
5.360  
5.341  
5.242  
5.206  
5.149  
5.116

1.357

0.861

0.000

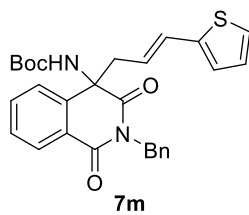

$^1\text{H NMR}$  (400 MHz,  $\text{CDCl}_3$ )

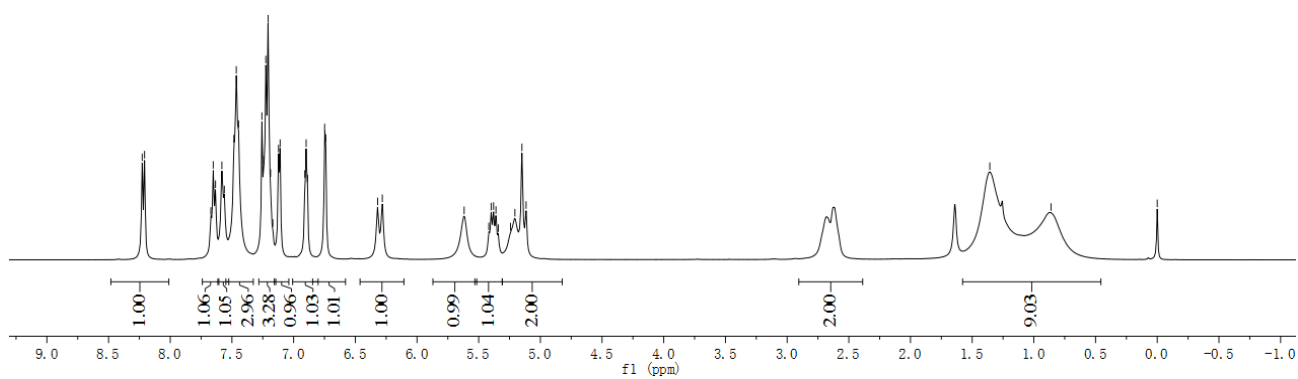

173.585  
163.624  
140.905  
136.814  
133.962  
129.281  
128.956  
128.360  
128.054  
127.419  
127.313  
126.116  
125.068  
124.843  
124.505  
119.168

81.081  
77.349  
77.031  
76.714

61.701

46.704  
44.026

27.855

0.000

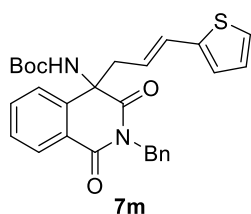

$^{13}\text{C NMR}$  (100 MHz,  $\text{CDCl}_3$ )

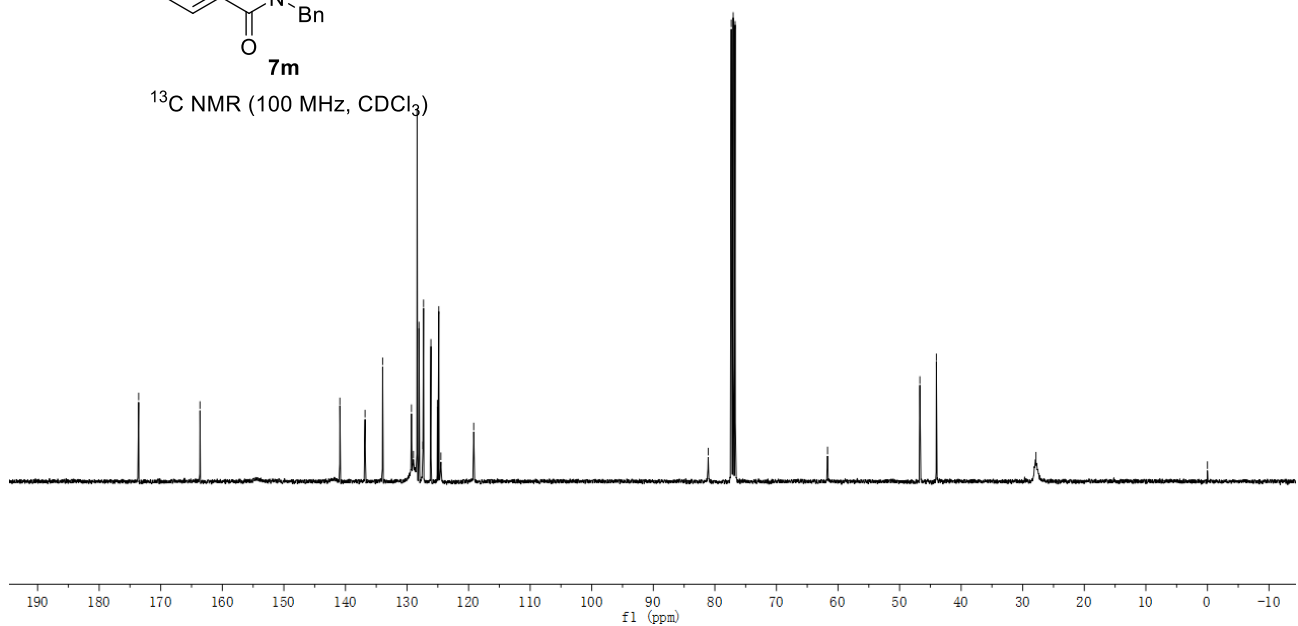

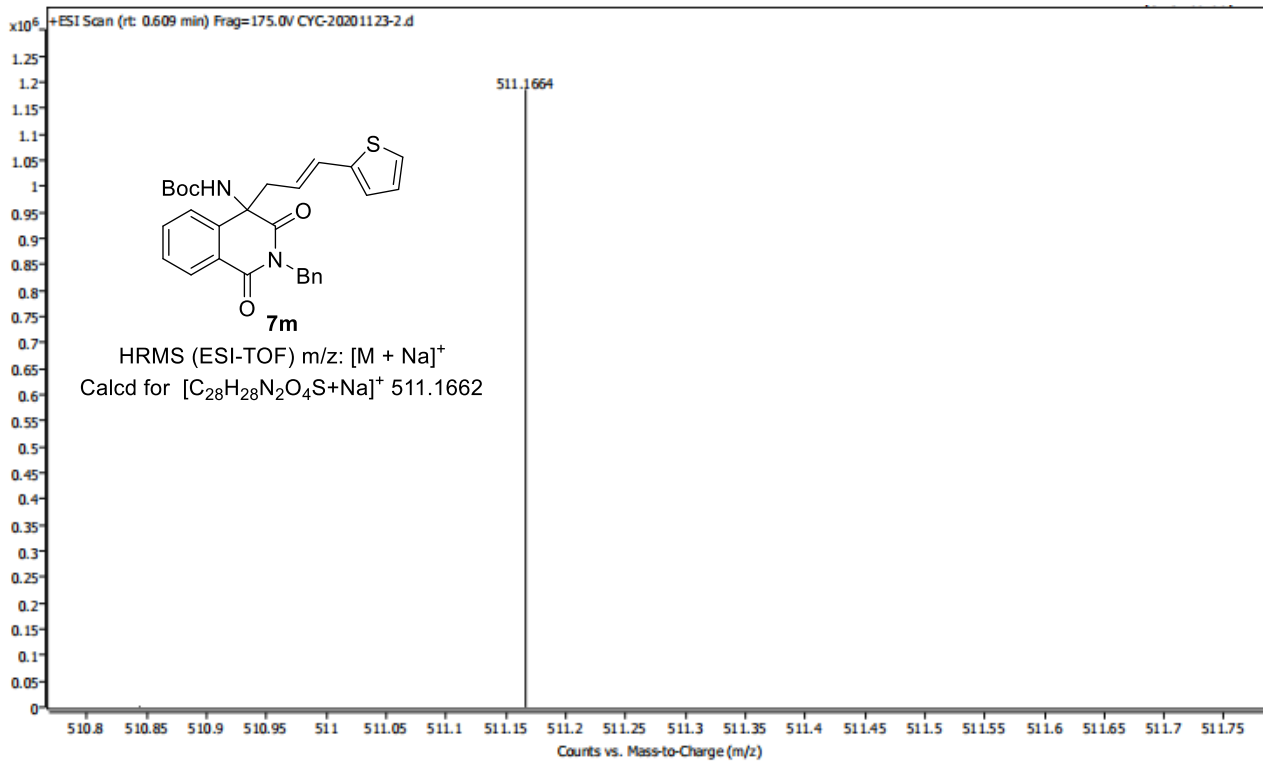

8.211  
8.192  
7.668  
7.650  
7.632  
7.582  
7.562  
7.478  
7.477  
7.458  
7.440  
7.437  
7.259  
7.242  
7.224  
7.220  
7.216  
7.204  
6.678  
6.658  
6.526  
6.493  
6.473  
6.054  
6.015  
5.934  
5.546  
5.525  
5.334  
5.316  
5.296  
5.277  
5.256  
5.208  
5.150  
5.115  
2.695  
2.670  
2.607  
2.606  
2.584  
2.554  
1.617  
1.335  
0.881  
0.000

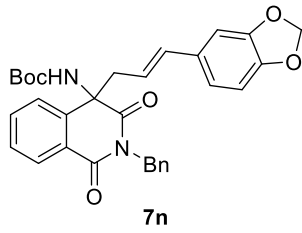

<sup>1</sup>H NMR (400 MHz, CDCl<sub>3</sub>)

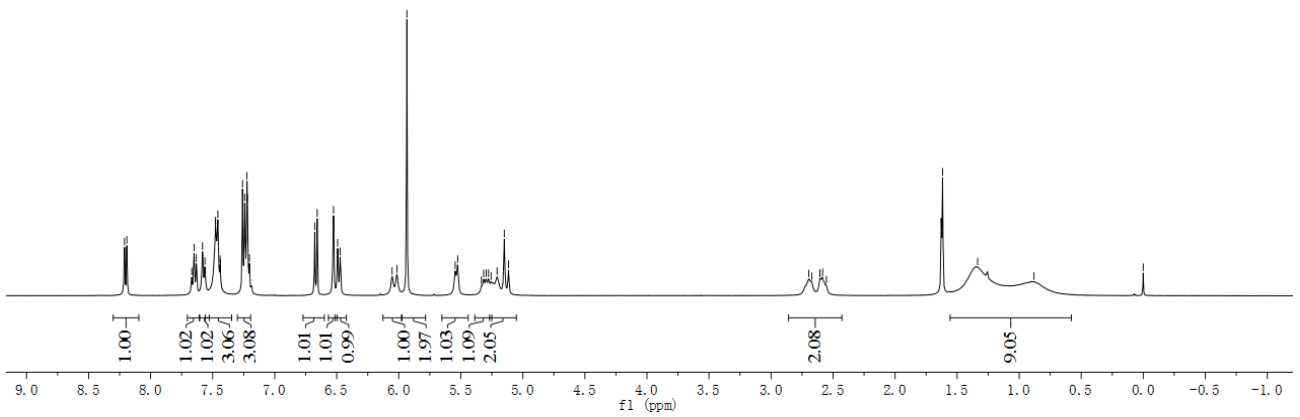

173.602  
163.708  
147.953  
147.565  
136.900  
136.021  
133.976  
130.458  
128.928  
128.425  
128.013  
127.530  
125.153  
124.422  
121.275  
117.632  
108.183  
105.637  
101.139  
81.071  
77.365  
77.048  
76.731  
61.783  
47.006  
43.960  
27.948

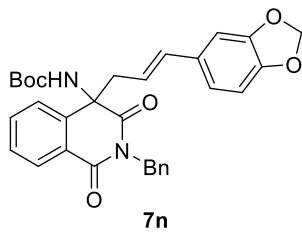

<sup>13</sup>C NMR (100 MHz, CDCl<sub>3</sub>)

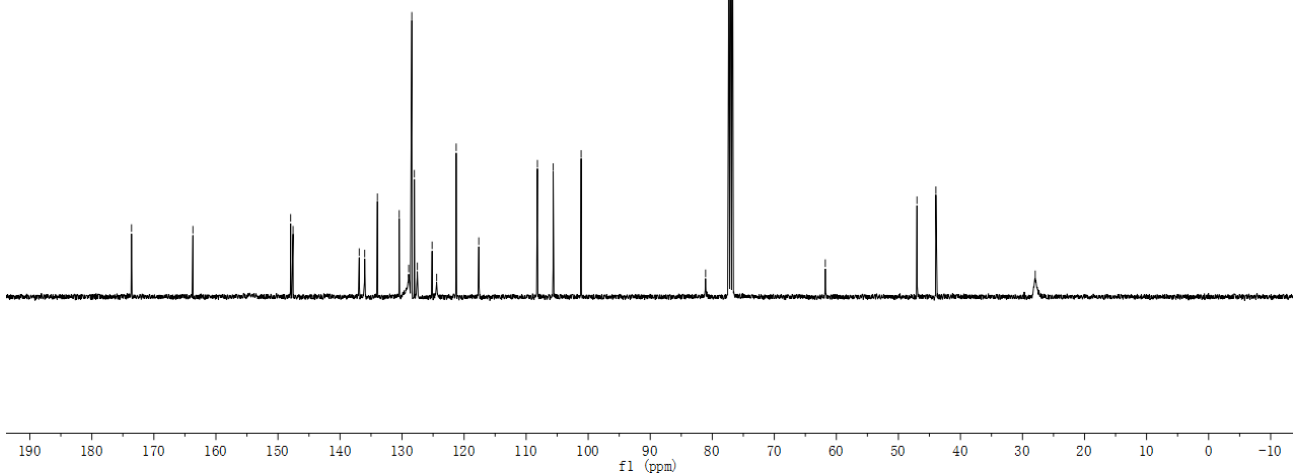

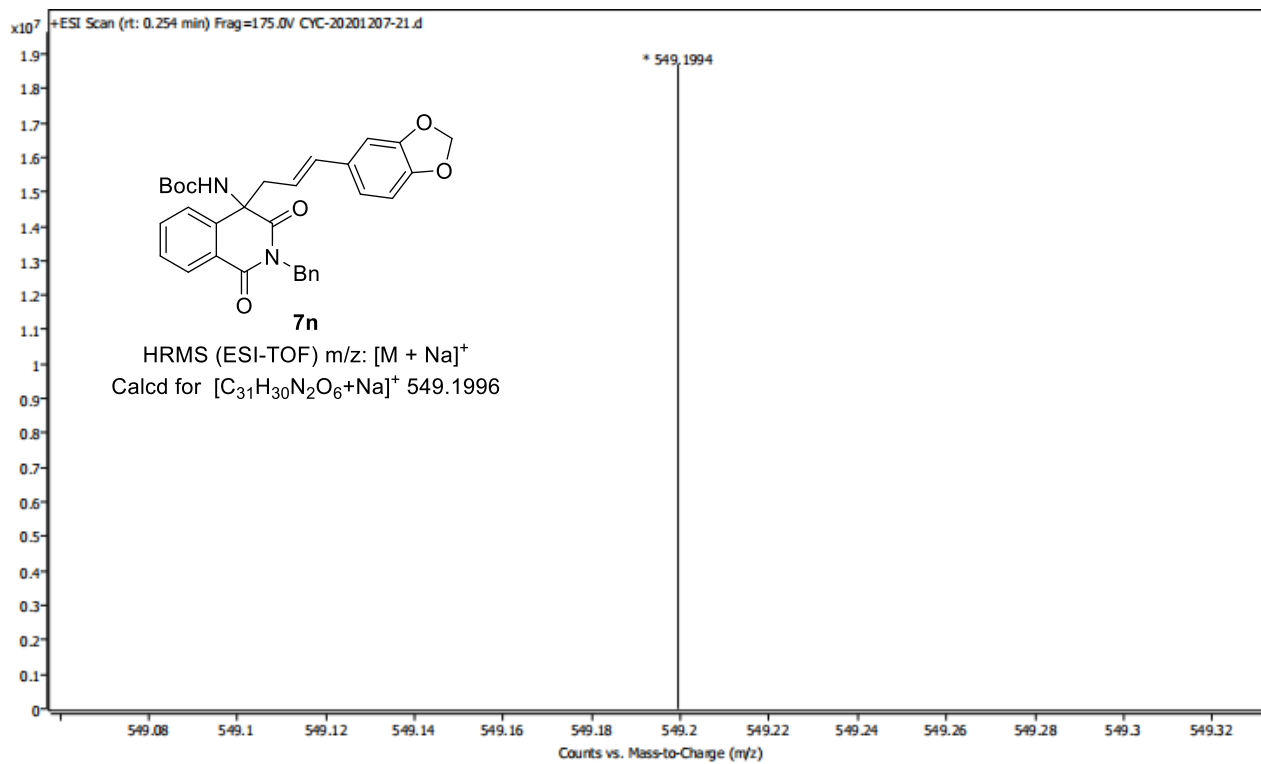

9.988

8.227  
8.207  
7.730  
7.728  
7.712  
7.709  
7.688  
7.669  
7.651  
7.631  
7.612  
7.486  
7.467  
7.449  
7.445  
7.431  
7.426  
7.418  
7.414  
7.399  
7.395  
7.379  
7.262  
7.193  
7.187  
7.171  
7.152  
7.132  
7.031  
7.011  
7.001  
6.964  
5.734  
5.419  
5.257  
5.222  
5.161  
5.127  
2.803  
2.696  
2.679  
2.665  
1.670  
1.660  
1.651  
1.350  
1.257  
0.925  
0 nms

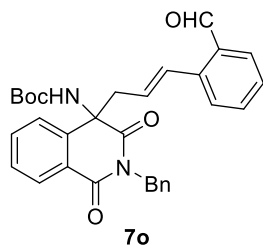

<sup>1</sup>H NMR (400 MHz, CDCl<sub>3</sub>)

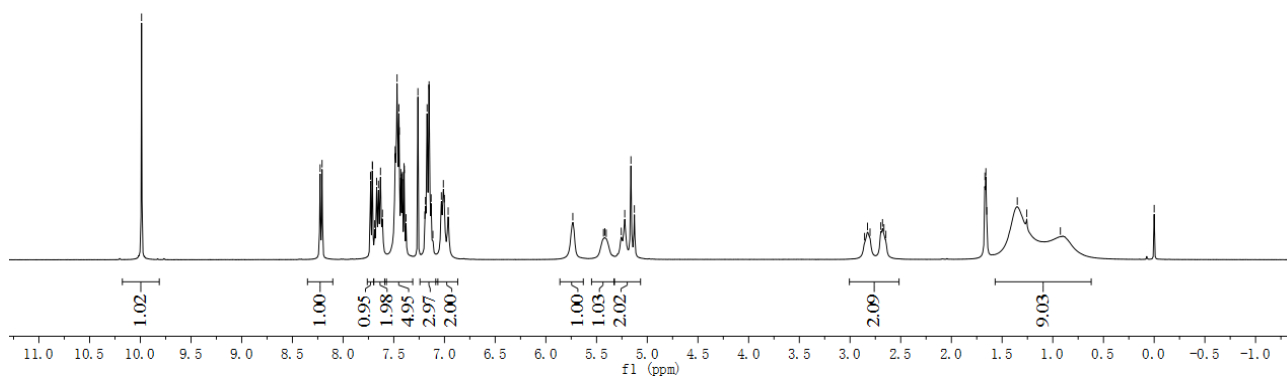

192.357  
173.436  
163.727  
138.416  
136.832  
134.168  
133.839  
133.387  
132.551  
132.291  
128.934  
128.292  
128.112  
128.052  
127.623  
127.496  
125.069  
124.770  
124.425  
81.064  
77.352  
77.034  
76.716  
61.642  
46.954  
43.933  
27.928  
0.000

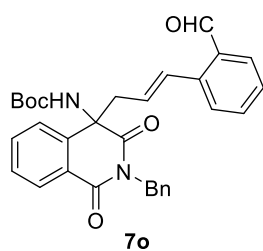

<sup>13</sup>C NMR (100 MHz, CDCl<sub>3</sub>)

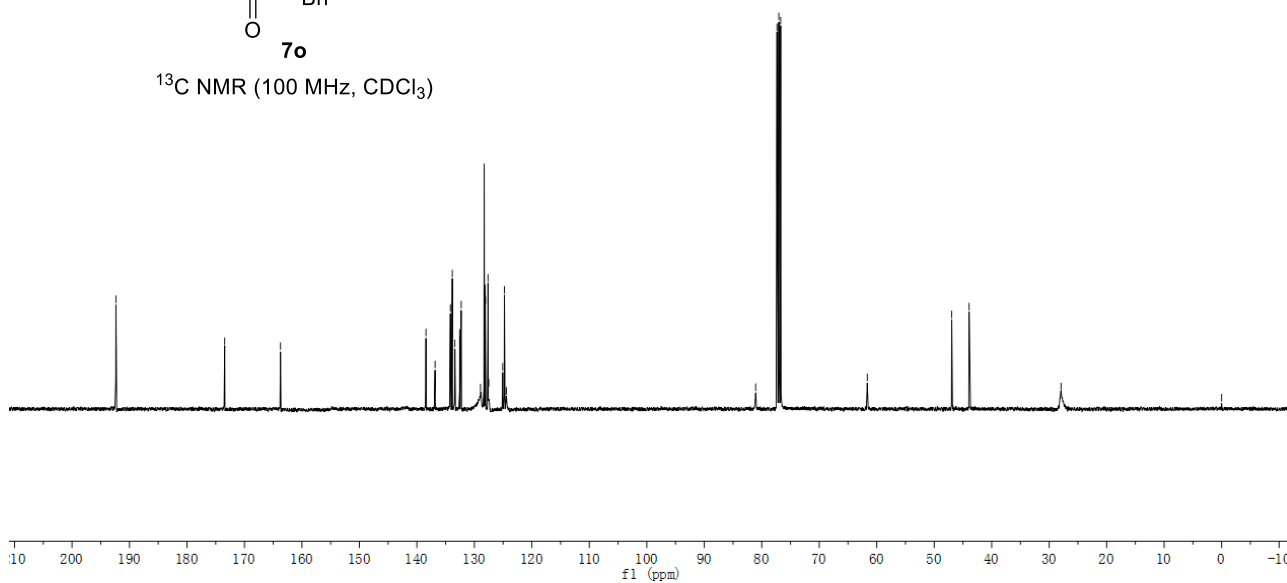

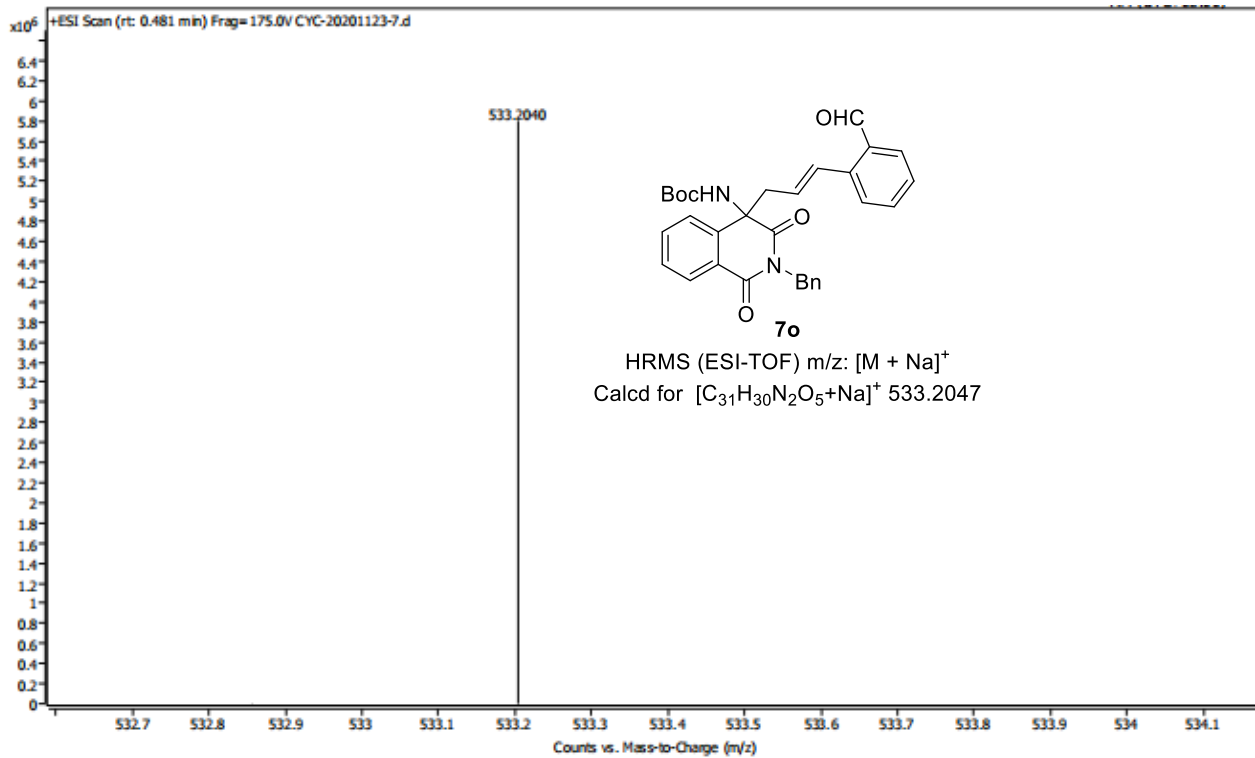

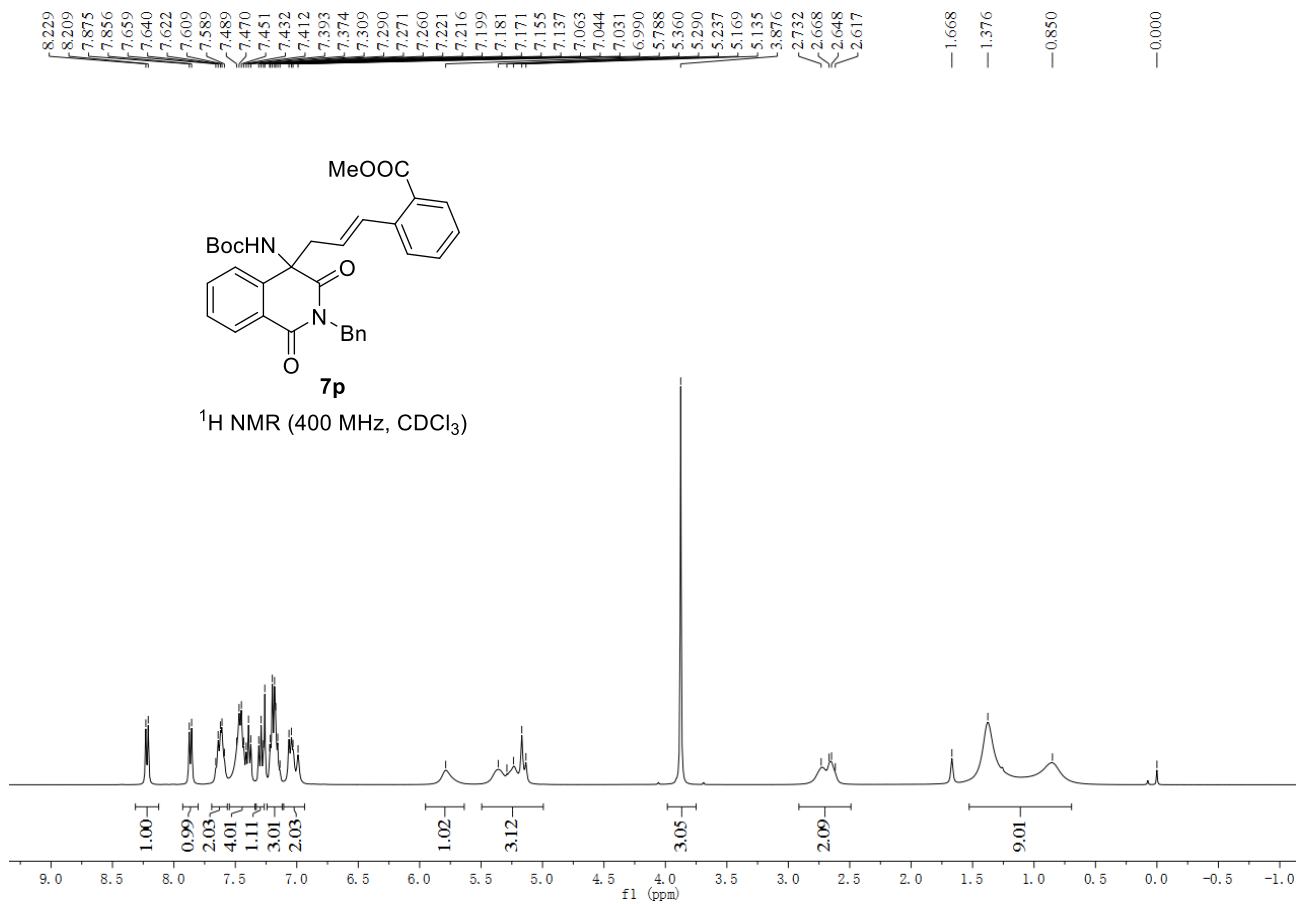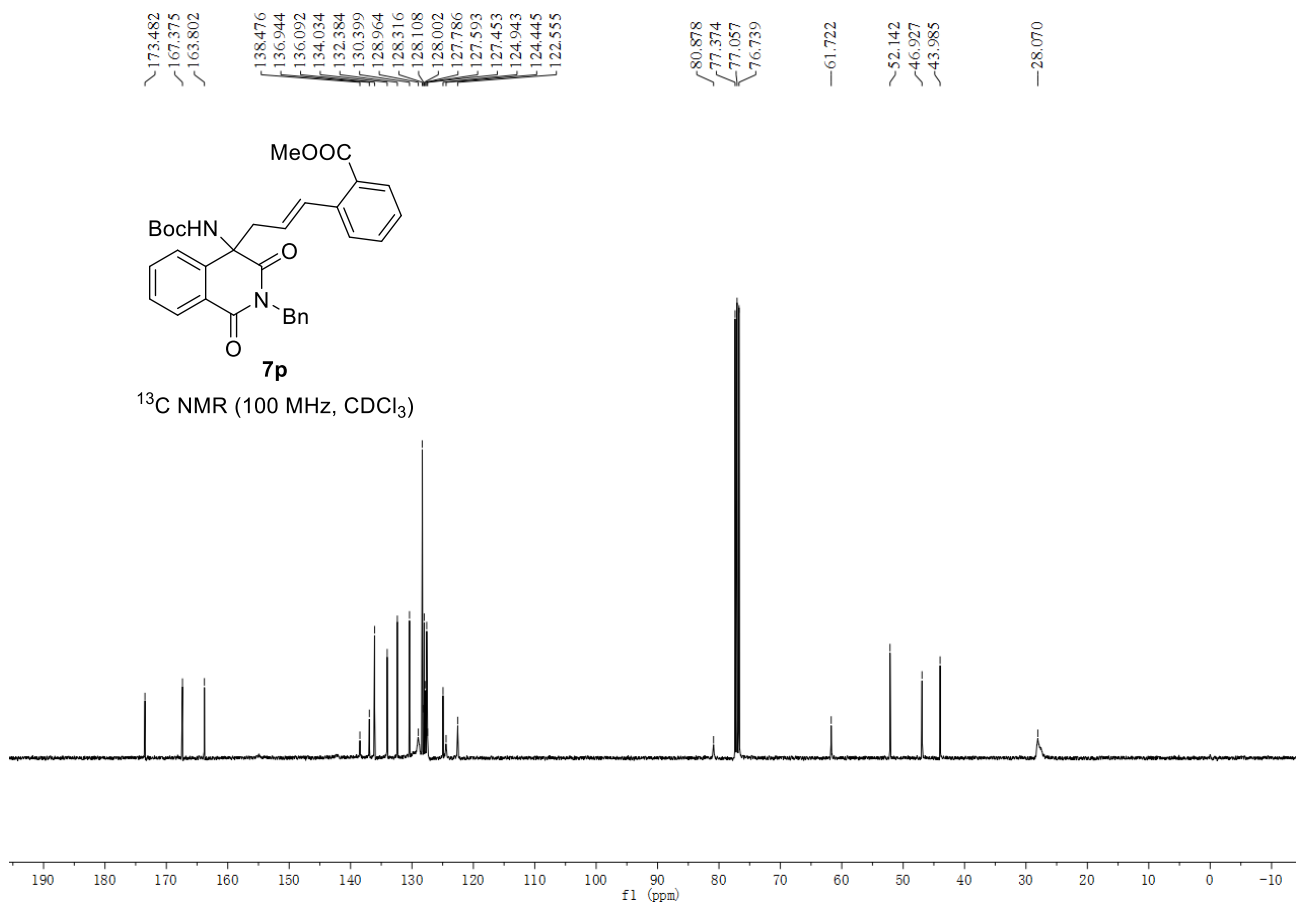



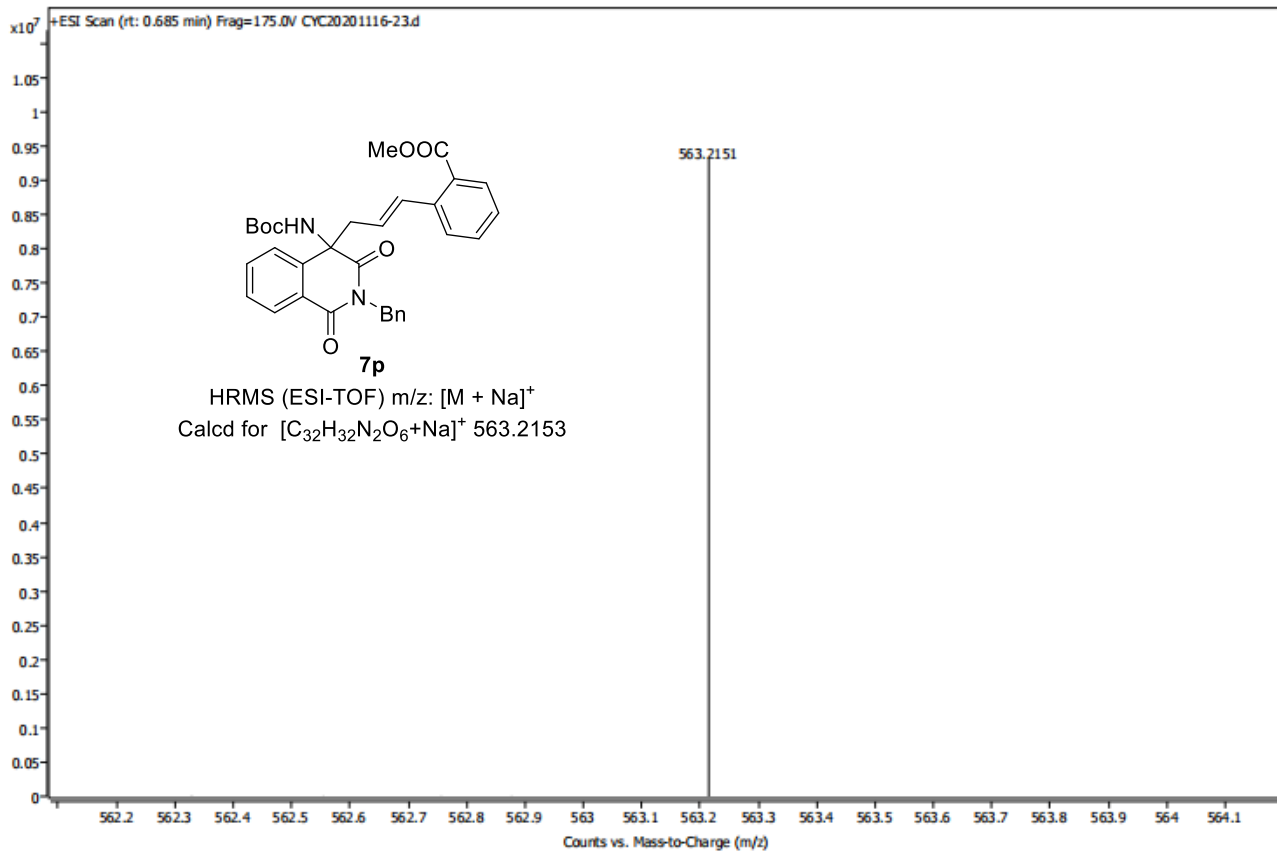

8.217  
8.198  
7.673  
7.654  
7.635  
7.594  
7.574  
7.480  
7.462  
7.443  
7.286  
7.266  
7.256  
7.247  
7.239  
7.225  
7.207  
7.191  
7.004  
6.984  
6.704  
6.677  
6.660  
6.633  
6.158  
6.118  
5.749  
5.705  
5.561  
5.550  
5.522  
5.504  
5.484  
5.465  
5.251  
5.224  
5.206  
5.157  
5.123  
2.729  
2.702  
2.649  
2.631  
2.617  
2.599  
1.601  
1.352  
1.255  
0.880  
0.000

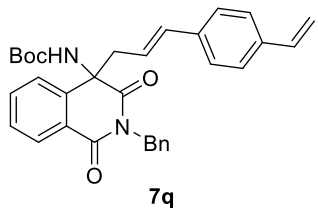

<sup>1</sup>H NMR (400 MHz, CDCl<sub>3</sub>)

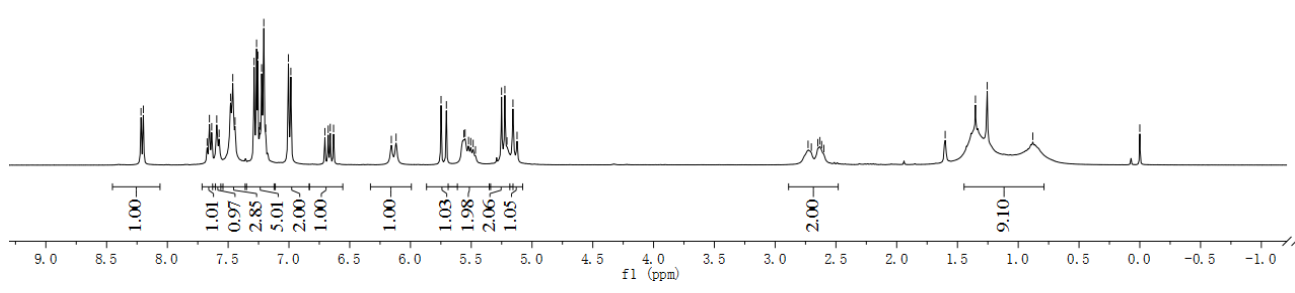

173.586  
163.677  
137.301  
136.893  
136.328  
136.071  
135.503  
133.988  
128.943  
128.387  
128.041  
127.481  
126.606  
126.380  
125.145  
124.451  
119.574  
114.048  
81.090  
61.752  
47.067  
43.984  
27.934

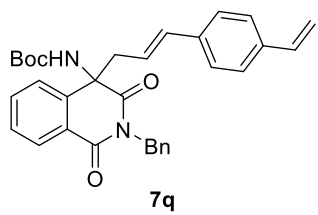

<sup>13</sup>C NMR (100 MHz, CDCl<sub>3</sub>)

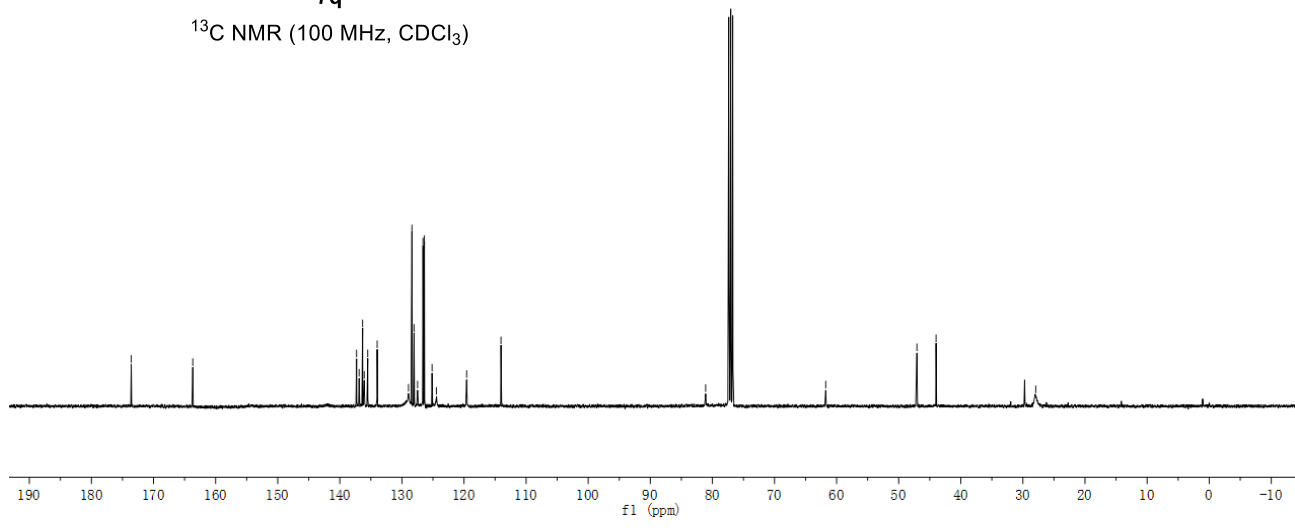

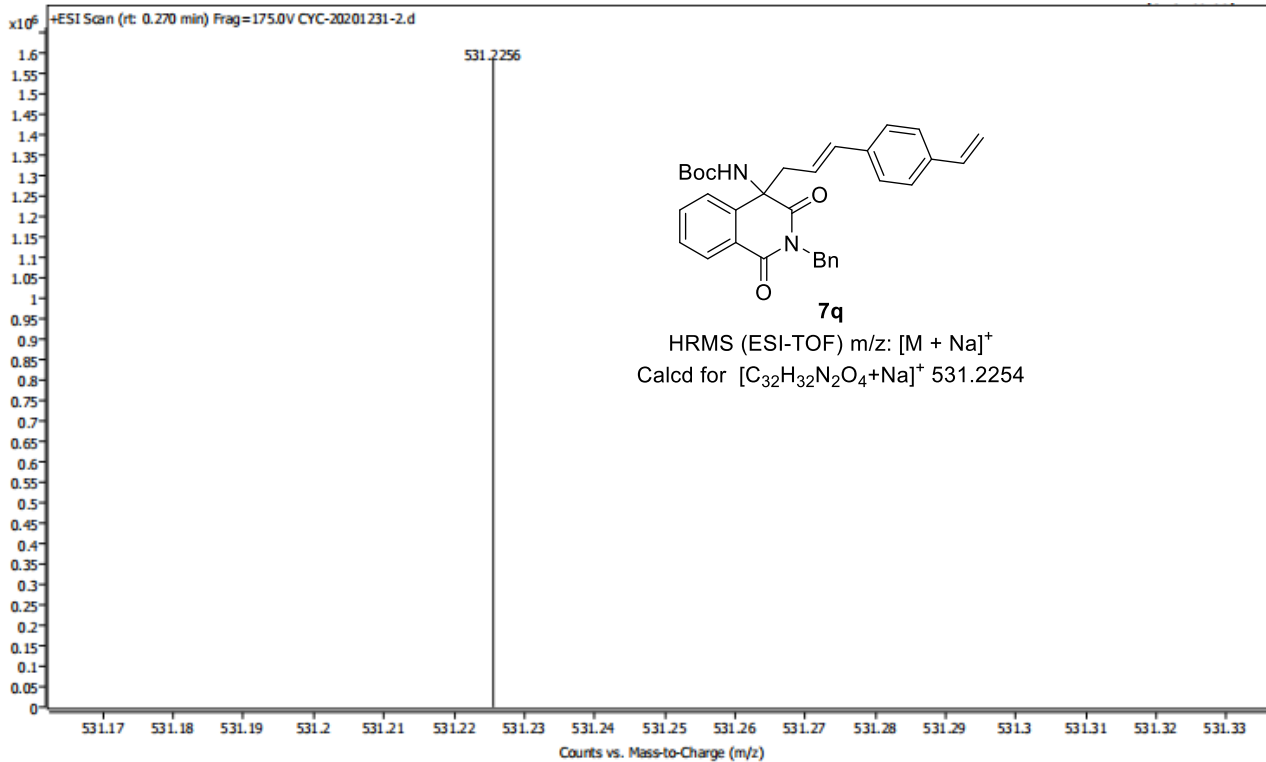

8.227  
8.208  
7.667  
7.648  
7.630  
7.580  
7.561  
7.497  
7.480  
7.461  
7.442  
7.340  
7.333  
7.317  
7.301  
7.281  
7.263  
7.252  
7.244  
7.231  
7.223  
7.216  
7.206  
7.199  
7.180  
6.496  
6.471  
6.457  
6.431  
6.360  
6.321  
6.010  
5.985  
5.973  
5.947  
5.579  
5.250  
5.214  
5.167  
5.141  
5.133  
5.121  
5.103  
5.084  
5.064  
2.696  
2.663  
2.639  
2.588  
2.551  
1.634  
1.350  
1.256  
0.880

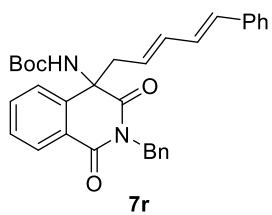

<sup>1</sup>H NMR (400 MHz, CDCl<sub>3</sub>)

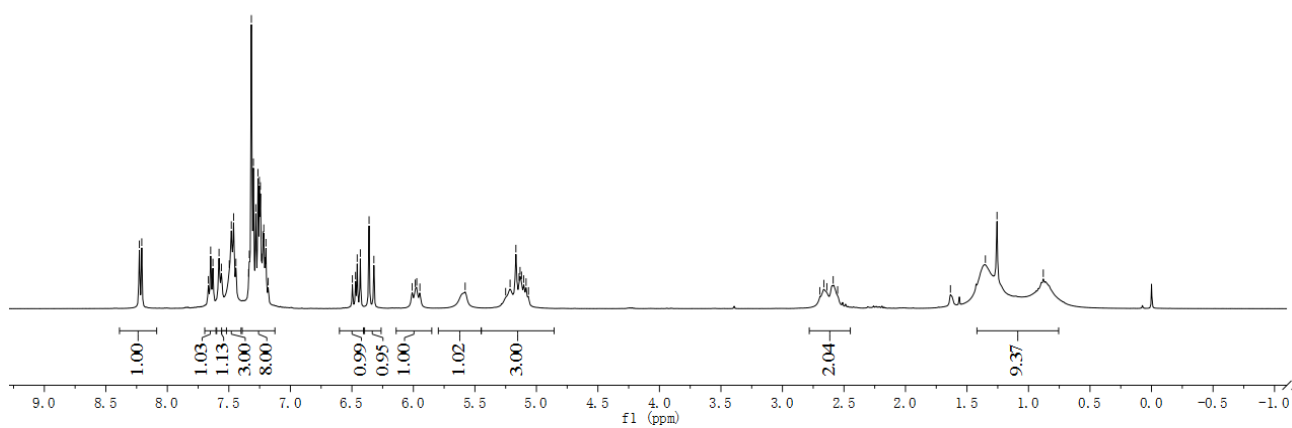

173.606  
163.747  
136.909  
136.838  
136.784  
134.010  
133.408  
128.927  
128.646  
128.412  
128.010  
127.857  
127.530  
126.473  
125.113  
124.481  
123.341  
81.056  
77.382  
77.064  
76.747  
61.657  
46.948  
44.013  
27.783

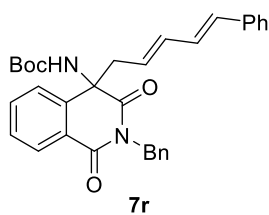

<sup>13</sup>C NMR (100 MHz, CDCl<sub>3</sub>)

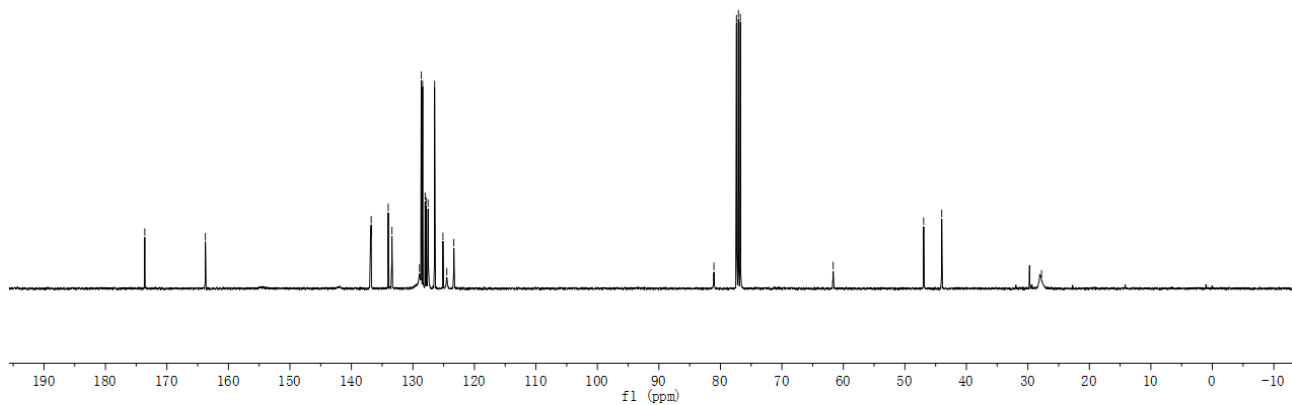

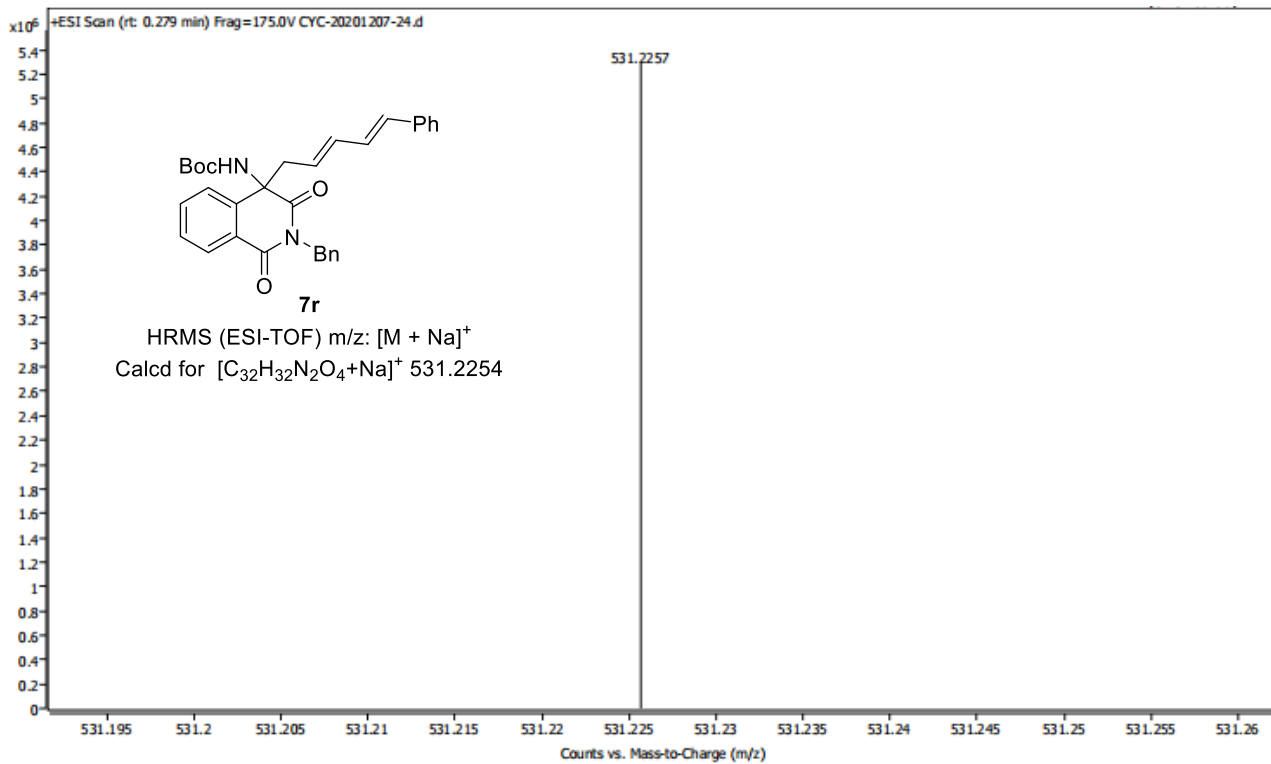

7.303  
7.287  
7.282  
7.269  
7.255  
7.250  
7.239  
7.231  
7.174  
7.161  
7.112  
7.093  
7.072  
7.052  
6.673  
6.654  
6.529  
6.490  
6.013  
5.994  
5.987  
5.968  
5.949  
5.231  
5.191  
— 4.639  
2.841  
2.823  
2.808  
2.790  
2.728  
2.708  
2.694  
2.674  
— 1.607  
— 1.255  
— 0.000

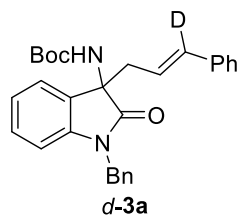

<sup>1</sup>H NMR (400 MHz, CDCl<sub>3</sub>)

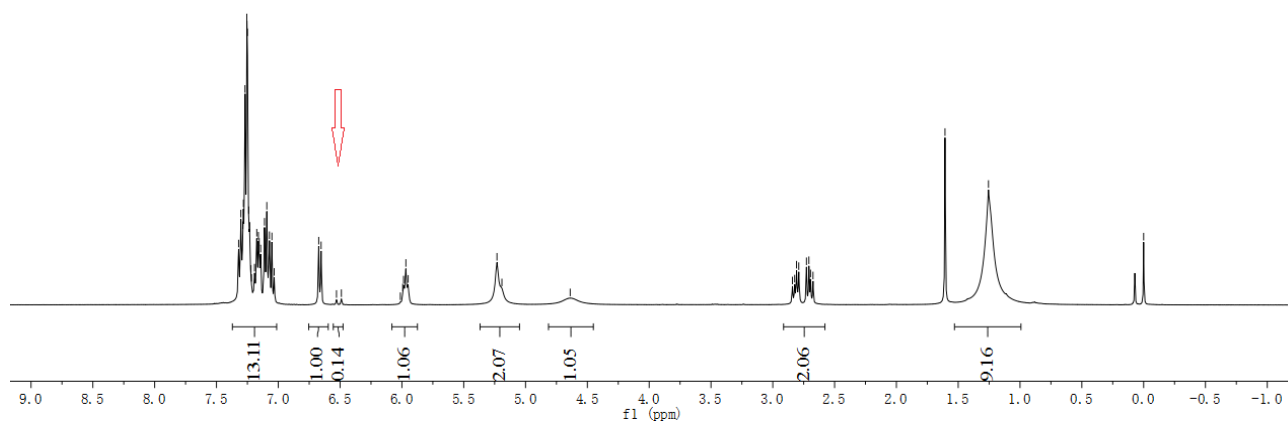

— 176.733  
— 153.744  
— 142.484  
136.414  
135.722  
128.764  
128.686  
128.619  
127.837  
127.407  
127.200  
126.489  
126.467  
122.725  
122.651  
120.889  
109.293  
80.507  
77.363  
77.046  
76.728  
— 61.483  
— 44.173  
— 41.559  
— 28.072

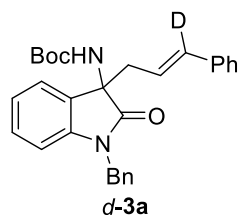

<sup>13</sup>C NMR (100 MHz, CDCl<sub>3</sub>)

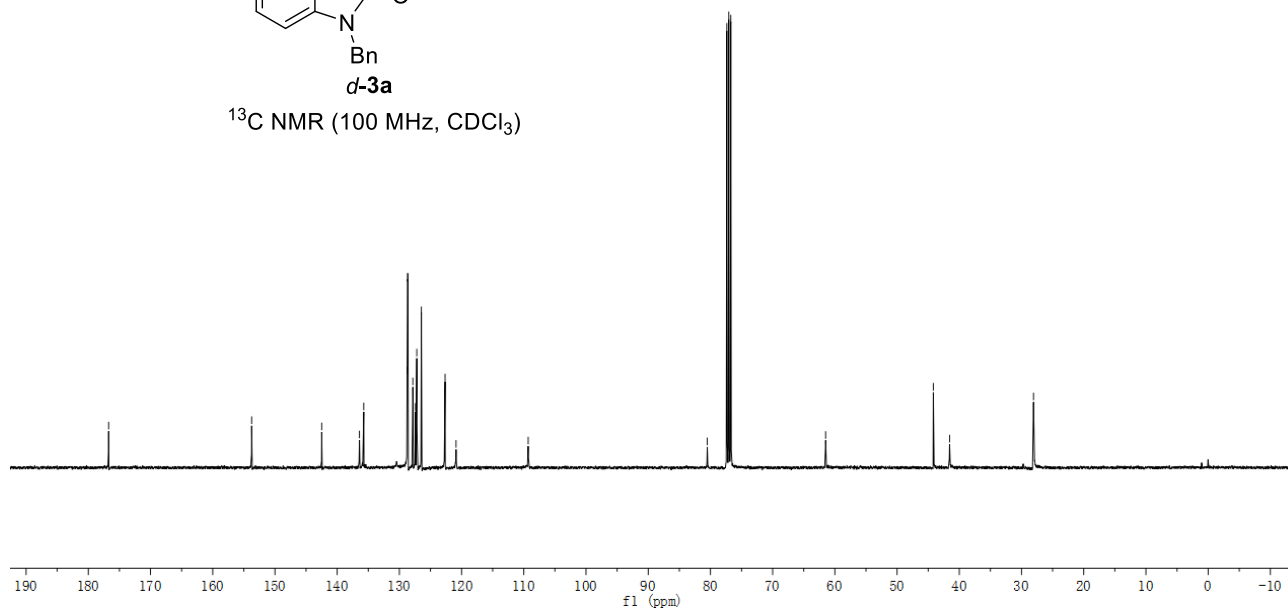

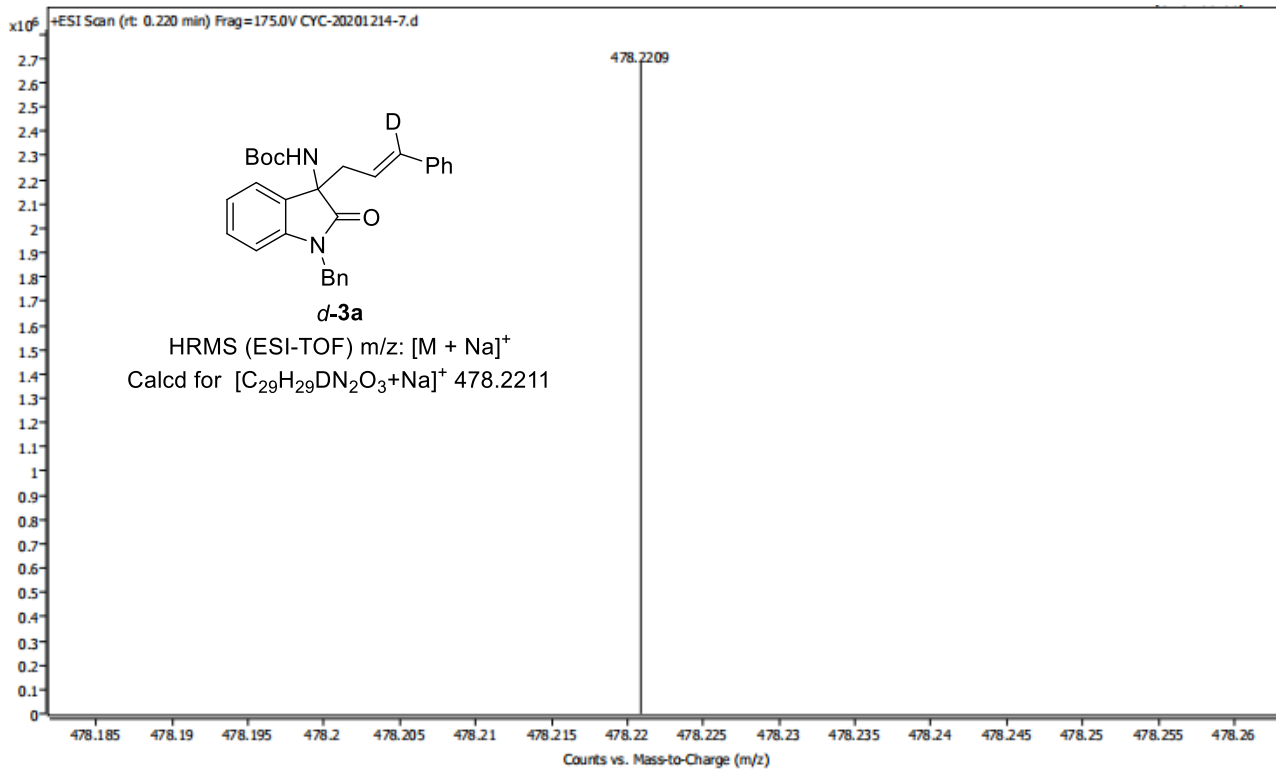

7.414  
7.396  
7.339  
7.321  
7.302  
7.268  
7.264  
7.261  
7.251  
7.246  
7.240  
7.228  
6.725  
6.685  
6.613  
6.436  
6.421  
6.407  
6.396  
6.381  
6.367

4.620  
4.608  
4.270

2.228

1.574

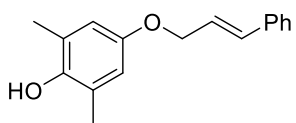

**9a**

$^1\text{H}$  NMR (400 MHz,  $\text{CDCl}_3$ )

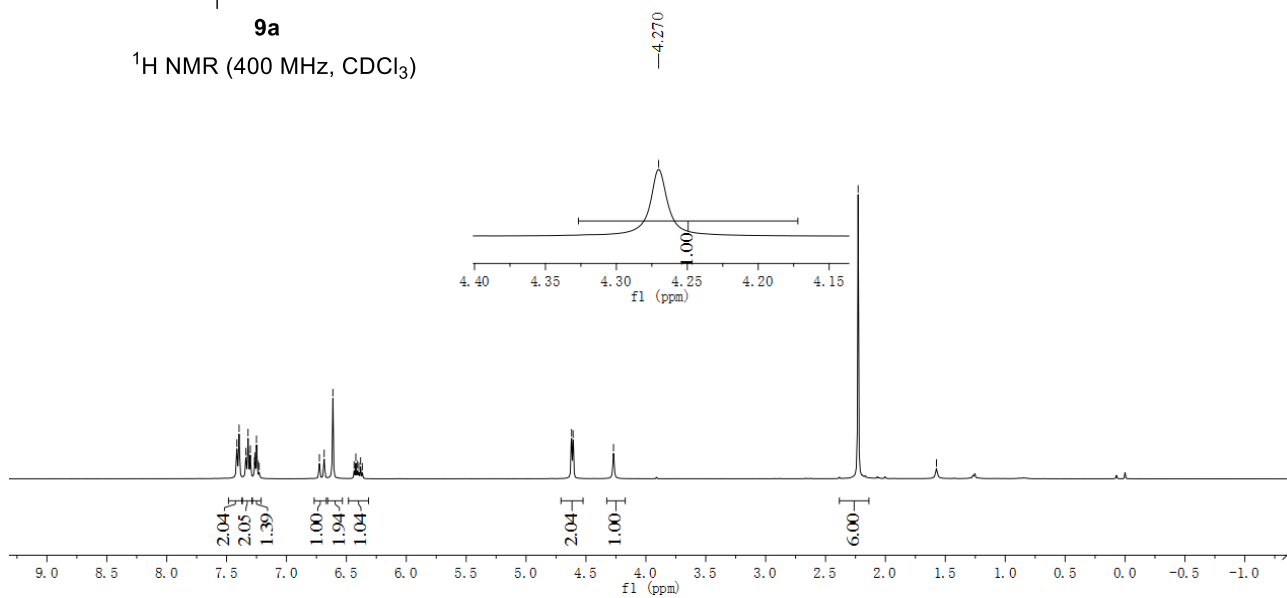

6.609

4.259

2.225

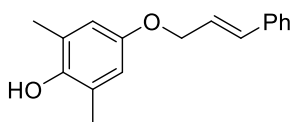

**9a**

$^1\text{H}$ - $^1\text{H}$  NOESY (600 MHz,  $\text{CDCl}_3$ )

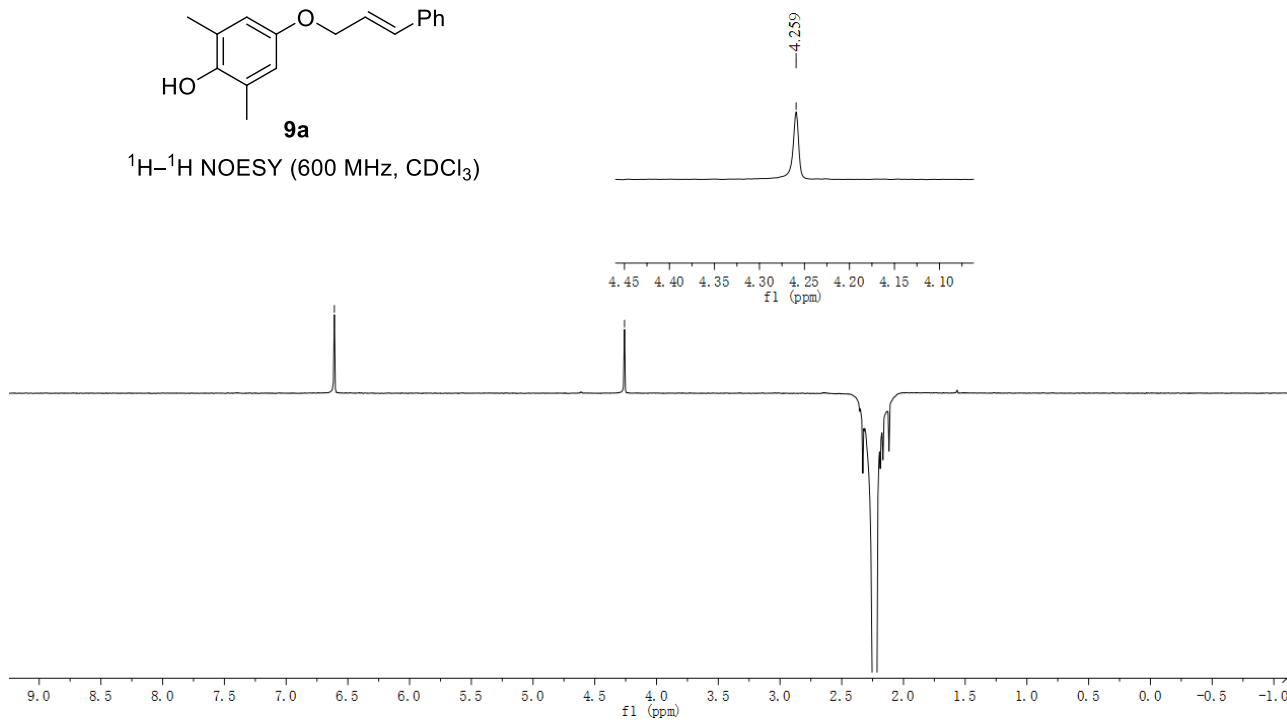



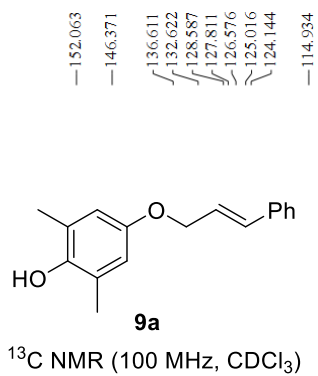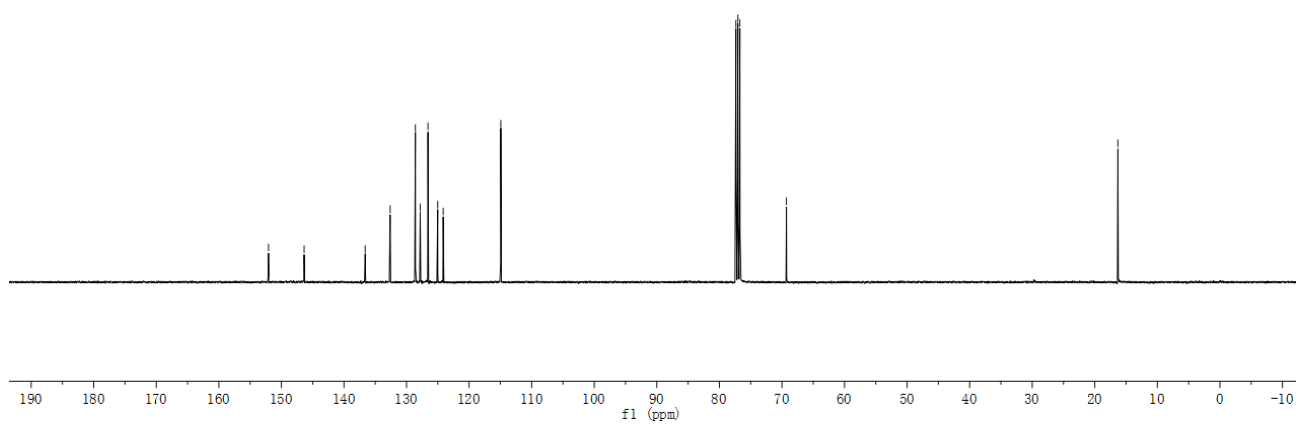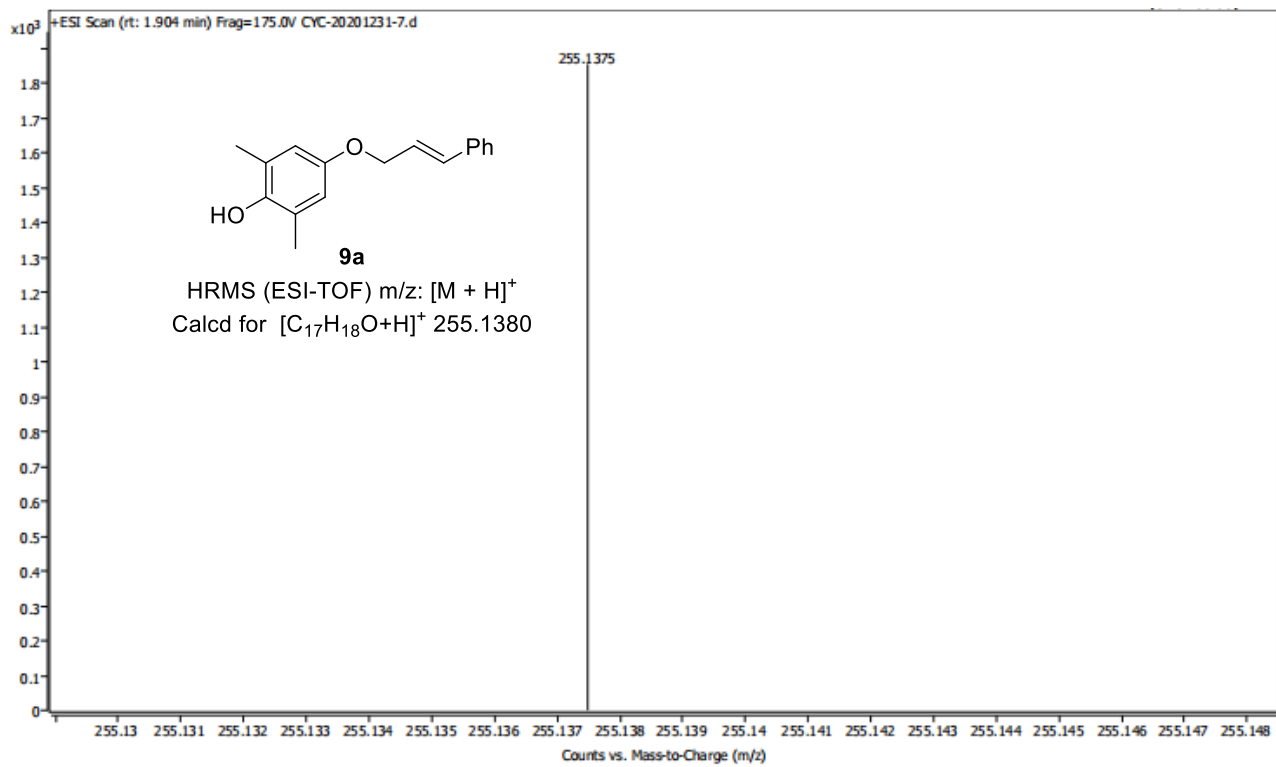

7.431  
7.412  
7.351  
7.333  
7.314  
7.277  
7.274  
7.270  
7.260  
7.253  
7.237  
6.738  
6.698  
6.490  
6.476  
6.461  
6.451  
6.436  
6.421

4.573  
4.426  
4.412

2.262

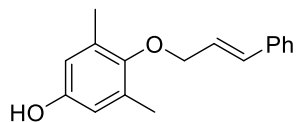

**9b**

$^1\text{H}$  NMR (400 MHz,  $\text{CDCl}_3$ )

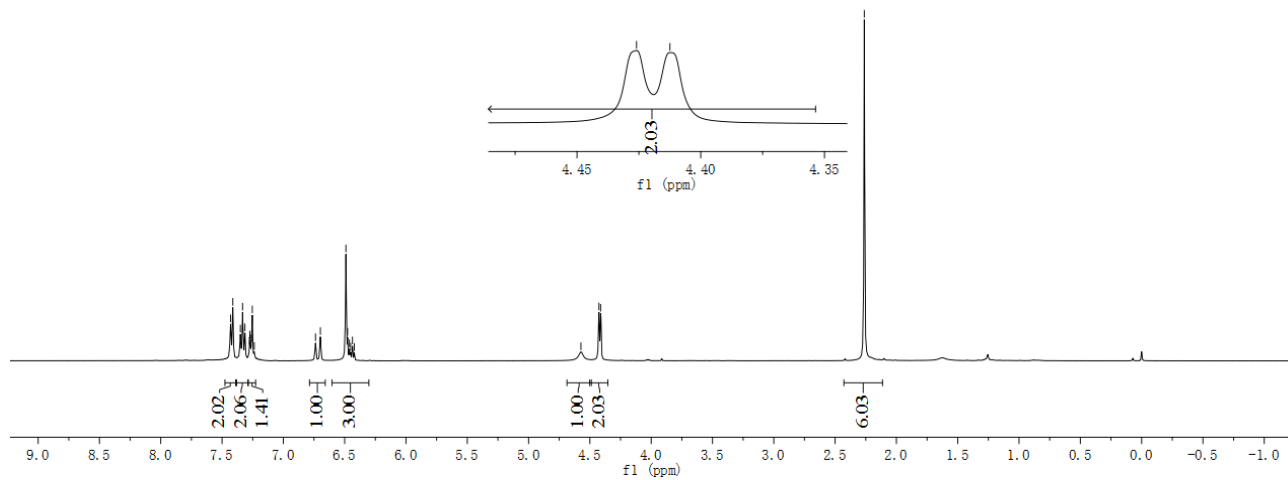

6.484

4.420  
4.410

2.257

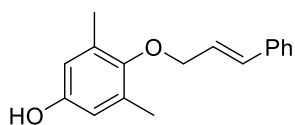

**9b**

$^1\text{H}$ - $^1\text{H}$  NOESY (600 MHz,  $\text{CDCl}_3$ )

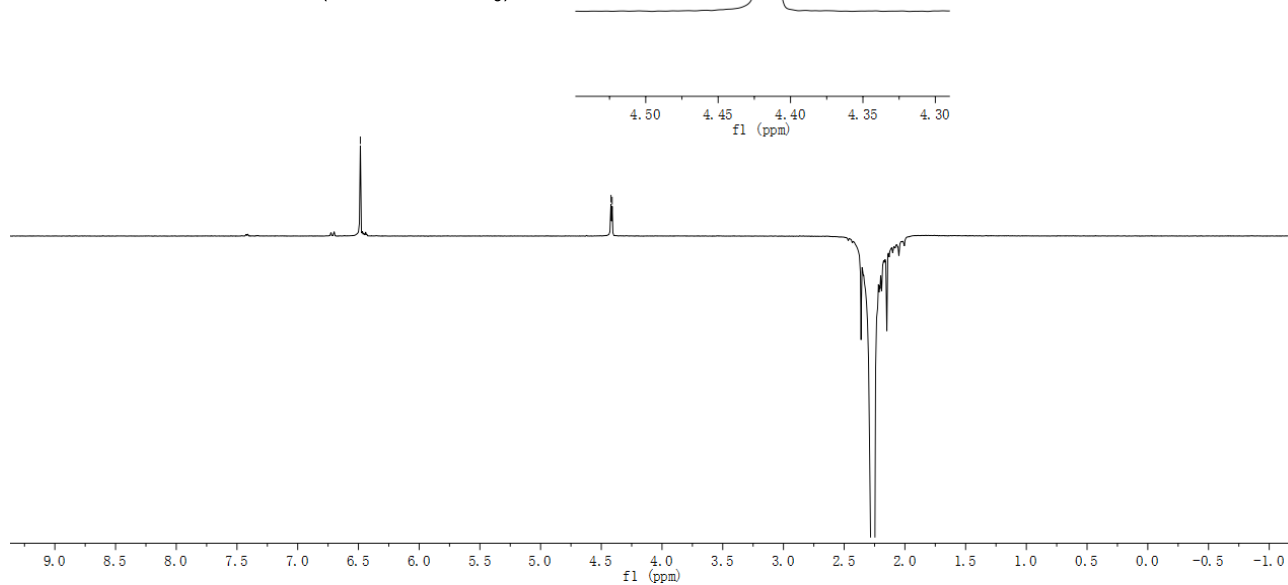

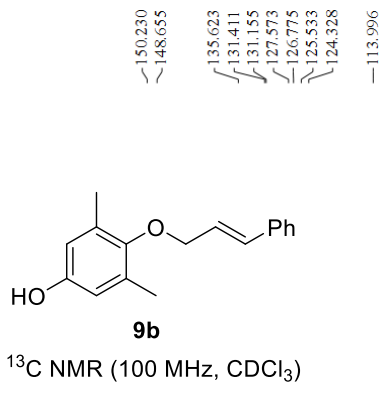

150.230  
 148.655  
 135.623  
 131.411  
 131.155  
 127.573  
 126.775  
 125.533  
 124.328  
 113.996

76.311  
 75.994  
 75.677  
 72.139

15.526

-0.000

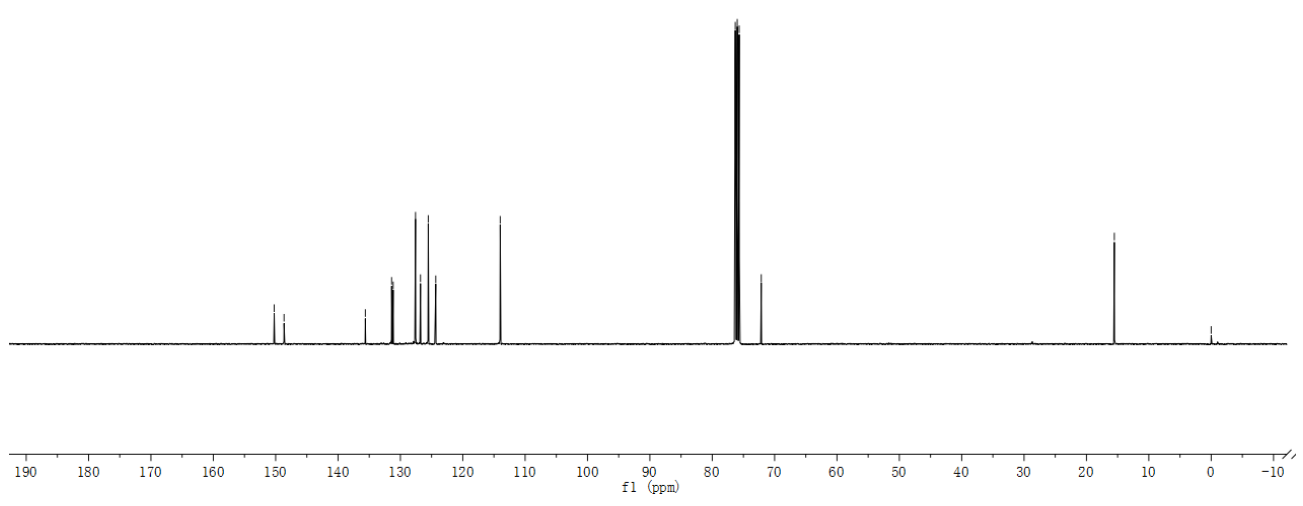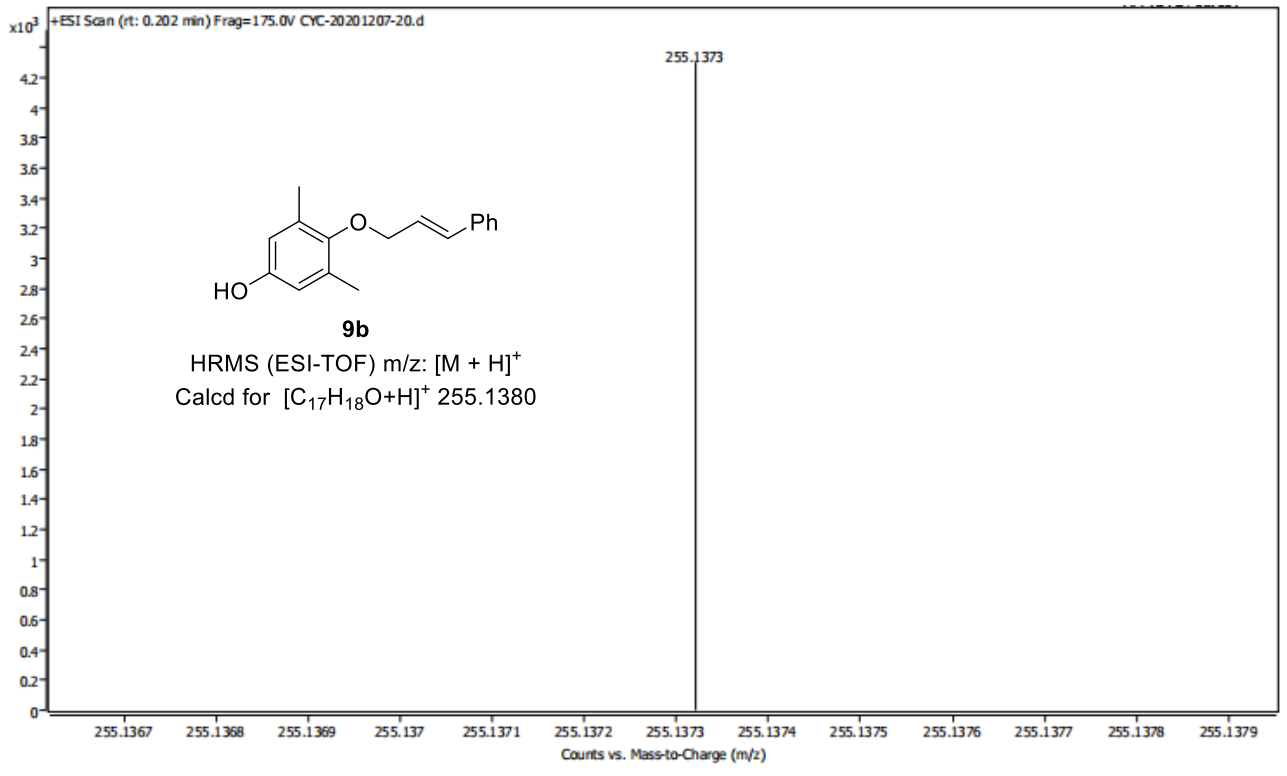

Supplement: d1qo00505g1.pdf [file d1qo00505g1.pdf]
